# Supplementary material for: Machine Learning Model for Multiomics Biomarkers Identification for Menopause Status in Breast Cancer
Source: MDPI journal article supplement (doi:10.3390/a17010013), 2023-12-28
Supplement: s1 [file s1]

Archive with 2 entries (2 files):
- Menupause_data_ALL.csv
- Supplemantry_materials.pdf
