# Supplementary material for: Machine Learning Model for Multiomics Biomarkers Identification for Menopause Status in Breast Cancer
Source: MDPI journal article supplement (doi:10.3390/a17010013), 2023-12-28
Supplement: s1 [file s1 › Menupause_data_ALL.csv]

GE_CBFB	GE_CDH1	GE_CDKN1B	GE_ERBB2	GE_FOXA1	GE_MAP2K4	GE_MAP3K1	GE_NCOR1	GE_PIK3CA	GE_PTEN	GE_RUNX1	GE_SF3B1	GE_GATA3	GE_FAM86B1	CAN_CBFB	CAN_CDH1	CAN_CDKN1B	CAN_ERBB2	CAN_FOXA1	CAN_MAP2K4	CAN_MAP3K1	CAN_NCOR1	CAN_PIK3CA	CAN_PTEN	CAN_RUNX1	CAN_SF3B1	CAN_GATA3	CAN_FAM86B1	DM_CBFB	DM_CDH1	DM_CDKN1B	DM_ERBB2	DM_FOXA1	DM_MAP2K4	DM_MAP3K1	DM_NCOR1	DM_PIK3CA	DM_PTEN	DM_RUNX1	DM_SF3B1	DM_GATA3	DM_FAM86B1	class
0.089660887	0.007616405	0.017021303	0.027251536	0.675474227	0.120441371	0.104393878	0.138547667	0.030971041	0.193678049	0.075810735	0.211225799	0.18681256	0.152638296	0.333333333	0.25	0.5	0	0.333333333	0.25	0.666666667	0.25	0.333333333	0.5	0.5	0.333333333	0.333333333	0.666666667	0.30667184	0.183434449	0.786329145	0.378228804	0.087609651	0.364404161	0.830686599	0.312659139	0.1627005	0.585045801	0.403159897	0.230297564	0.362313358	0.171793572	1
0.142717802	0.025127521	0.534844939	0.060432518	0.405584267	0.164410193	0.167497798	0.347175207	0.112862782	0.242908716	0.317482975	0.16981996	0.280684015	0.372594942	0.333333333	0.25	0.5	0.333333333	0.333333333	0.5	0.666666667	0.5	0.333333333	0.5	0.5	0.333333333	0.333333333	0.666666667	0.113505764	0.221366705	0.247022502	0.439100514	0.121795783	0.44526416	0.947506651	0.287206132	0.187978171	0.126311643	0.343619419	0.311737498	0.515644034	0.097278888	0
0.092380923	0.226401732	0.370822436	0.03597445	0.620960525	0.117204527	0.161614094	0.407367975	0.134331596	0.474049659	0.384662439	0.183186226	0.257800642	0.217875158	0.333333333	0.25	0.5	0.333333333	0.666666667	0.25	0.666666667	0.5	0.333333333	0.5	0.75	0.333333333	0.333333333	0.666666667	0.278163605	0.263833854	0.168432326	0.636083813	0.080526301	0.678416644	0.934960428	0.384500997	0.278635363	0.135527738	0.231004771	0.308057163	0.299055193	0.146775105	0
0.171568296	0.627462973	0.225167999	0.020773469	0.396712226	0.101516657	0.077670235	0.455305137	0.137946846	0.284994235	0.292599577	0.258338835	0.428767489	0.159386454	0.666666667	0.5	0.5	0	0.333333333	0.25	0.666666667	0.75	0.333333333	0.5	0.5	0.333333333	0.333333333	0.333333333	0.085736967	0.097600914	0.186985142	0.573476675	0.03767954	0.504810464	0.954005376	0.074464112	0.126439373	0.097150666	0.191492101	0.300275791	0.193515374	0.219412659	0
0.197119964	0.268059107	0.406444655	0.028434806	0.498294815	0.12906659	0.0682414	0.29081116	0.109801186	0.21635038	0.159145741	0.088828727	0.280695493	0.119734894	0.333333333	0.25	0.75	0.333333333	0.666666667	0.5	1	0.5	0.333333333	0.5	0.25	0	0.333333333	0.333333333	0.070930984	0.174489437	0.134403101	0.413102775	0.204876642	0.386971213	0.893247117	0	0.236314819	0.228263341	0.380990688	0.444344871	0.635338124	0.2160688	1
0.106720708	0.103697617	0.096777103	0.019772986	0.331592347	0.190680371	0.198741012	0.401924518	0.125628268	0.194374104	0.07837563	0.140091436	0.307207973	0.099135511	0.333333333	0.25	0.5	0.666666667	0.333333333	0.75	1	0.75	0.333333333	0.25	0.5	0	0	0.333333333	0.266620789	0.28448756	0.848225216	0.474507974	0.047896323	0.271505899	0.800146106	0.180481362	0.090791201	0.246934513	0.786017363	0.162037392	0.255276826	0.144840799	1
0.269058221	0.285671856	0.644887784	0.011099459	0.82412926	0.204937774	0.063797076	0.576109854	0.314912351	0.311841514	0.037381287	0.243351838	0.573856638	0.109053243	1	0.75	0.75	0	0.666666667	0.25	1	0.25	0.666666667	0.75	0.25	0	0	0.333333333	0.129669663	0.056820867	0.075883803	0.82991086	0.01186815	0.197444071	0.957878457	0.301075631	0.119807771	0.057014386	0.828155983	0.308566864	0.127139473	0.095352143	1
0.08487356	0.0135814	0.260268203	0.022064456	0.639631873	0.176248768	0.464106383	0.337387794	0.234024901	0.307004964	0.135754374	0.44435544	0.565752118	0.43194609	0.333333333	0.25	0.5	0.333333333	0.333333333	0.25	0.666666667	0.25	0.333333333	0.5	0.25	0.666666667	0.333333333	0.666666667	0.307278496	0.171223099	0.653332532	0.427999186	0.028331676	0.208676523	0.988443018	0.347836042	0.093825171	0.071120709	0.451601443	0.099121396	0.122288143	0.104529458	1
0.170894958	0.138403895	0.632595667	0.033881485	0.475873585	0.072229883	0.098215955	0.249993478	0.116676071	0.297135804	0.155843893	0.165068729	0.479646404	0.040842937	0.333333333	0.25	0.5	0.333333333	0.333333333	0.25	0.666666667	0.25	0.333333333	0.5	0.5	0.333333333	0.333333333	0.333333333	0.163782169	0.169969692	0.02026661	0.189823964	0.045624901	0.509416792	0.908388517	0.532285809	0.092949397	0.180764216	0.092072428	0.084668959	0.201603632	0.226437955	1
0.248063745	0.298620631	0.153303243	0.034898486	0.684816011	0.423032659	0.414109016	0.410611501	0.168822117	0.27008817	0.333627321	0.252173538	0.306901929	0.247323708	0.666666667	0.5	0.5	0.333333333	0.333333333	0.5	0.666666667	0.5	0.666666667	0.5	0.5	0.333333333	0.333333333	0.666666667	0.127141003	0.339983568	0.306686597	0.502104472	0.182994685	0.606859451	0.632054879	0.215613289	0.128819944	0.061807048	0.289892152	0.396005248	0.506034234	0.096212871	1
0.43243901	0.36374019	0.178971356	0.724501359	0.00380385	0.180036759	0.083650294	0.353596581	0.229479819	0.288329765	0.235862219	0.213840752	0.017532712	0.224926578	0.666666667	0.5	0.75	0.666666667	0	0.25	0.333333333	0.25	0.666666667	0.25	0.75	0	0.666666667	1	0.126912693	0.373771629	0.365485716	0.134133365	0.574178935	0.622034104	0.871959117	0.242753061	0.095952605	0.330877515	0.243949225	0.166063933	0.891113728	0.0583563	1
0.132563251	0.158102565	0.387701056	0.077297269	0.375382087	0.049971965	0.846141691	0.310028689	0.175676303	0.248127841	0.952755401	0.272945101	0.261713864	0.220847219	0.333333333	0.25	0.5	0.666666667	0.333333333	0.25	1	0.25	0.333333333	0.5	0.5	0.333333333	0.333333333	1	0.080449864	0.264359509	0.20560038	0.35063951	0.108514505	0.717940619	0.384530966	0.391969746	0.113798131	0.038245989	0.262405082	0.134183603	0.599518112	0.081232449	0
0.185199256	0.019607009	0.360513305	0.024476234	0.530855045	0.087782705	0.234957771	0.177762115	0.14919773	0.176512145	0.287156335	0.121491189	0.312164069	0.423910489	0.333333333	0.25	0.5	0	0.333333333	0.25	0.666666667	0.25	0.333333333	0.25	0.5	0.333333333	0.333333333	0.666666667	0.147221963	0.321113458	0.158643405	0.611305772	0.091886145	0.568493519	0.812588631	0.234665851	0.138743969	0.358346912	0.129766804	0.18606789	0.397287336	0.085549039	1
0.239365167	0.263635612	0.372347324	0.022233684	0.349525061	0.206603856	0.162598954	0.304596376	0.122394286	0.392210579	0.406353087	0.208894405	0.125871462	0.216976899	0.666666667	0.5	0.5	0.333333333	0.333333333	0.5	0.666666667	0.5	0.333333333	0.5	0.5	0.333333333	0.333333333	0.666666667	0.1098027	0.164704684	0.450911328	0.620927641	0.143631257	0.43355357	0.726611039	0.144654727	0.0920856	0.217173525	0.087050758	0.102581569	0.557132804	0.058238329	0
0.305951859	0.14099347	0.719857703	0.014115326	0.614190855	0.128418268	1	0.600041202	0.127315148	0.469808241	0.292468289	0.271431545	0.37469981	0.19938078	0.666666667	0.5	0.5	0.333333333	0.333333333	0.25	0.666666667	0.5	0.333333333	0.5	0.5	0.333333333	0.333333333	0.333333333	0.145048912	0.11941922	0.050649842	0.595776322	0.027030289	0.438529165	0.746256995	0.137029131	0.103650372	0.189523903	0.182634683	0.269302784	0.158730567	0.173612246	1
0.169486111	0.39105468	0.260612431	0.020537147	0.223517925	0.01451797	0.220949355	0.242485246	0.109213194	0.286783118	0.34990866	0.172839332	0.146123232	0.002557055	1	0.75	0.25	0.666666667	0	0.25	1	0.75	0.666666667	0.25	0.25	0.666666667	0.666666667	0.333333333	0.103816224	0.172926984	0.130878331	0.607989526	0.085730682	0.654221111	0.504387943	0.044165647	0.189419355	0.312909921	0.186860764	0.349468609	0.366960654	0.368466548	1
0.377789771	0.486051679	0.179983111	0.026595708	0.443736404	0.187483772	0.094736517	0.302140202	0.134771578	0.188585943	0.105618761	0.136909048	0.282492275	0.292358056	1	0.75	0.5	0.333333333	0.333333333	0.5	0.666666667	0.5	0.333333333	0.25	0.5	0	0.333333333	0.666666667	0.05610771	0.177664342	0.189168455	0.2657625	0.078209761	0.369726859	0.372409689	0.205364341	0.196178536	0.236466423	0.087814716	0.12311849	0.328384688	0.168853891	1
0.196326404	0.287887324	0.159223969	0.019568937	0.22537243	0.194683993	0.252031639	0.243521348	0.421200931	0.206864507	0.453964164	0.166845453	0.221756501	0.017668208	0.333333333	0.25	0.75	0.333333333	0.333333333	0.5	0.666666667	0.5	1	0.5	0.75	0.333333333	0.666666667	0.666666667	0.171414959	0.305205225	0.161114521	0.55157042	0.072147545	0.48553702	0.483690938	0.087355443	0.070911422	0.188198308	0.231972434	0.672645346	0.500335548	0.119044001	1
0.23861284	0.298902863	0.064379196	0.025271047	0.572424651	0.282177638	0.093111147	0.182172484	0.051697087	0.292873706	0.168804483	0.14539658	0.21292122	0.277635472	0.666666667	0.5	0.5	0.333333333	0.333333333	0.5	0.666666667	0.5	0.333333333	0.25	0.5	0.333333333	0.333333333	1	0.020464822	0.221178973	0.854838625	0.341738985	0.059119068	0.336826004	0.693656572	0.080555906	0.225549865	0.230382713	0.144768359	0.275568136	0.626846029	0.163288995	1
0.282226692	0.696285485	0.232748652	0.046992475	0.699804482	0.113291314	0.100272696	0.248062154	0.133031765	0.312249556	0.210823877	0.118092968	0.263990486	0.074670112	1	0.75	0.5	0.666666667	0.333333333	0.25	0.666666667	0.25	0.333333333	0.5	0.5	0	0.666666667	0.666666667	0.234095299	0.075857853	0.236383135	0.082658048	0.031662725	0.187283631	0.862006619	0.276777686	0.104898255	0.189784908	0.100418457	0.244029269	0.602604645	0.135883022	1
0.289520863	0.187144551	0.186068575	0.018047716	0.487111639	0.132262818	0.0628244	0.165784019	0.119875448	0.077501949	0.171115337	0.22107573	0.030149737	0.171371533	0.333333333	0.25	0.25	0.333333333	0	0.25	0.666666667	0.25	1	0.5	0.75	0.666666667	0.333333333	1	0.201515483	0.503169496	0.080180316	0.610822188	0.164887014	0.857418659	0.963017541	0.204730163	0.13967439	0.104207765	0.218443252	0.164771684	0.830242902	0.138070987	1
0.223735474	0.439772358	0.205046727	0.013698178	0.331017426	0.178400671	0.071914716	0.352643685	0.121813221	0.25127159	0.170770735	0.12038111	0.621492871	0.088811534	0.666666667	0.5	0.5	0	0.666666667	0.5	0.666666667	0.5	0.333333333	0.5	0.5	0.333333333	0.333333333	0.333333333	0.062206161	0.190898281	0.060108159	0.453903622	0.055146827	0.23966219	0.966212869	0.119850273	0.097148689	0.231117587	0.22226681	0.059760438	0.229074027	0.166206351	0
0.374617628	0.224076252	0.322278041	0.755239722	0.435037602	0.170402955	0.198855929	0.380575024	0.1196659	0.253828551	0.144117522	0.182765366	0.129800124	0.066489413	0.666666667	0.5	0.5	1	0.333333333	0.5	0.666666667	0.5	0.333333333	0.5	0.75	0.333333333	0.333333333	0.666666667	0.1580773	0.328439897	0.017620838	0.216712981	0.135955519	0.884708627	0.974684637	0.164586985	0.090551199	0.175004535	0.412340168	0.101890438	0.841869239	0.134139974	1
0.363588555	0.943079092	0.057333647	0.373639484	0.698539717	0.153233101	0.257154372	0.370993278	0.186495917	0.203372991	0.114963138	0.325121315	0.182401909	0.025677986	1	0.75	0.25	1	0.333333333	0.5	0.666666667	0.5	0.666666667	0.25	0.5	0.666666667	0.333333333	0.333333333	0.013180225	0.18150027	0.770261274	0.47174254	0.112704583	0.513651139	0.993605479	0.45263532	0.829970817	0.287768083	0.217638679	1	0.668690937	0.636530168	1
0.168774302	0.01117941	0.19573864	0.032991316	0.57315066	0.179947741	0.334559963	0.355630738	0.051675136	0.283135217	0.140559063	0.331145072	0.244834024	0.108152064	0.333333333	0.25	0.25	0.333333333	0.333333333	0.5	0.666666667	0.5	0.333333333	0.75	0.5	0.666666667	0.666666667	0.666666667	0.223299671	0.151518917	0.049803068	0.194594238	0.014830036	0.147991069	0.911831203	0.093521981	0.147821256	0.075946715	0.062927036	0.078746172	0.401639921	0.148239379	1
0.159128132	0.021100848	0.256567016	0.026717637	0.182328963	0.179694477	0.101056638	0.255008061	0.099334255	0.252023694	0.439937713	0.076276846	0.197350006	0.156347685	0.333333333	0.25	0.5	0.666666667	0.333333333	0.75	1	0.75	0.333333333	0.5	0.75	0.333333333	0.333333333	1	0.261805092	0.36452623	0.260843478	0.522015533	0.133640152	0.523282275	0.940675792	0.297689109	0.362081173	0.145626383	0.212348351	0.329626988	0.538378959	0.155319979	1
0.220542937	0.200409277	0.171312345	0.05484381	0.253722235	0.089345699	0.068283135	0.195725092	1	0.320315706	0.187278487	0.137559036	0.021749422	0.066097001	0.333333333	0.25	0.5	1	0	0.25	0.333333333	0.25	0.333333333	0.25	0.5	0.333333333	0.666666667	0.333333333	0.191581108	0.600392373	0.146296976	0.429155377	0.220675608	0.902352411	0.965855736	0.120590182	0.123768082	0.139772443	0.28439681	0.145765179	0.919660006	0.082917576	1
0.28945709	0.420511494	0.242312574	0.161008596	0.527463976	0.125926309	0.162664917	0.087591447	0.116792859	0.140579992	0.160292414	0.289005341	0.176606271	0.256716534	0.666666667	0.5	0.5	1	0	0.25	0.666666667	0.25	0.333333333	0.25	0.25	0.333333333	0.666666667	0.666666667	0.145620645	0.453352231	0.285516394	0.116047796	0.197253907	0.676771001	0.914994672	0.256878001	0.159574012	0.131861383	0.468897682	0.36791647	0.63941475	0.141772073	1
0.247497188	0.158314921	0.093442299	0.268901472	0.35012615	0.095090482	0.104502792	0.198559168	0.114844191	0.265278168	0.260746926	0.185290614	0.08698034	0.068010642	0.333333333	0.25	0.25	1	0.333333333	0.25	0.333333333	0.25	0.666666667	0.5	0.75	0.333333333	0.333333333	0.333333333	0.308023856	0.651083067	0.666168401	0.274228503	0.214454329	0.902378595	0.962281185	0.189112352	0.171232242	0.093665406	0.421261695	0.281795402	0.887354315	0.158503616	1
0.223536265	0.141403462	0.421764422	0.079277236	0.366406384	0.158202133	0.067789982	0.161404929	0.171200218	0.189318256	0.174097146	0.102547331	0.338502854	0.152064665	0.333333333	0.25	0.5	1	0.333333333	0.25	0.333333333	0.25	0.666666667	0.25	0.25	0	0.333333333	0.333333333	0.1661891	0.34048349	0.067045778	0.266492419	0.136578391	0.629739994	0.915187325	0.140336538	0.137484315	0.311649007	0.376791323	0.235097472	0.341043733	0.132740984	1
0.407758163	0.070555437	0.128621395	0.00300293	0.051659074	0.101165737	0.08558744	0.242789687	0.29171755	0.311061919	0.409903314	0.351718724	0.020827183	0.034630444	0.666666667	0.5	0.5	0	0	0.25	0.333333333	0.25	0.666666667	0.25	0.25	0.333333333	1	0.333333333	0.158959423	0.425822985	0.084840162	0.931787497	0.223749001	0.93004941	0.977451858	0.139366544	0.126226407	0.164416349	0.353918276	0.14560546	0.888280003	0.067492412	0
0.291323912	0.144969491	0.16971867	0.020905158	0.001852973	0.155515064	0.097497241	0.256596871	0.214544768	0.479046572	0.184053243	0.20779109	0.065206289	0.205110943	0.333333333	0.25	0.25	0	0	0.25	0.333333333	0.25	0.333333333	0.75	0.75	0.333333333	0.666666667	1	0.195055979	0.235344079	0.113369102	0.879467631	0.572497081	0.930770297	0.977003463	0.117596326	0.122054438	0.175990067	0.076540692	0.17714403	0.525224129	0.119577271	1
0.239641935	0.203770715	0.310185837	0.04605382	0.477968874	0.121536268	0.255828601	0.228952367	0.189327826	0.377728312	0.39384865	0.380404189	0.206168803	0.049269412	0.666666667	0.5	0.5	0.666666667	0.333333333	0	0.666666667	0	0.666666667	0.5	0.75	0.333333333	0.333333333	1	0.121037145	0.302507421	0.144362365	0.210434358	0.128763147	0.605394053	0.874882939	0.250662461	0.215358737	0.092924621	0.165566219	0.289469892	0.445713644	0.137213527	1
0.162047477	0.097215769	0.224575438	0.032899432	0.667920397	0.413299345	0.806567898	0.434729599	0.200471486	0.423930528	0.349157032	0.405049095	0.240214745	0.089339975	0.333333333	0.25	0.5	0	0.333333333	0.25	0.666666667	0.25	0.333333333	0.25	0.5	0.333333333	0	0.666666667	0.355412618	0.342623815	0.567989561	0.329364987	0.064783394	0.27395054	0.556039526	0.449803313	0.145072923	0.245090724	0.072535368	0.223211054	0.328441645	0.241941073	1
0.175812814	0.152214387	0.520221905	0.034781489	0.472414907	0.26715913	0.221163028	1	0.219484678	0.286114007	0.299826643	0.283576165	0.232454524	0.026209809	0.333333333	0.25	0.75	0.666666667	0.333333333	0.75	1	0.75	0.333333333	0.5	0.5	0.333333333	0.333333333	0.333333333	0.466395205	0.564445392	0.147125492	0.483896517	0.160907195	0.517894275	0.91987189	0.525641126	0.109844089	0.38506632	0.164324626	0.197395599	0.503534747	0.281316477	0
0.07153641	0.005492296	0.391320606	0.058050676	0.445124678	0.197108752	0.13280825	0.030008975	0.017944353	0.168324173	0.338421621	0.053224045	0.46769487	0.063498907	0.333333333	0.25	0.5	0.333333333	0.333333333	0.25	0.666666667	0.25	0.333333333	0.5	0.5	0.333333333	0.333333333	0.333333333	0.317998685	0.201979357	0.057442903	0.260150717	0.045886852	0.292918526	0.840240668	0.311261934	0.151076378	0.122924701	0.099771813	0.132076537	0.1874774	0.301453825	1
0.379514893	0.07957871	0.120911178	0.021761016	0.001238359	0.065650789	0.034986185	0.177503162	0.153736445	0.159620261	0.302697685	0.377389587	0.009123856	0.125258015	0.333333333	0.25	0.25	0.666666667	0	0.25	0.333333333	0.25	0.666666667	0	0.5	0.666666667	1	0.333333333	0.051535859	0.219632445	0.386797461	0.86156905	0.797683664	0.897532996	0.860744913	0.331871639	0.180706556	0.169221544	0.139981183	0.105106594	0.982559077	0.075841071	1
0.323152518	0.086045823	0.134994659	0.034801105	0.0000317	0.079380218	0	0.098511676	0.082667756	0.123348274	0.061140604	0.049141128	0.015664198	0.079261313	1	0.75	0.75	0.333333333	0	0.5	0.333333333	0.5	0.666666667	0.5	0.5	0.333333333	0.666666667	0.333333333	0.161204445	0.108505027	0.054375548	0.902904625	0.639363638	0.934903072	0.869463534	0.265017344	0.152825429	0.295926459	0.26761472	0.532571149	0.947508971	0.117210936	1
0.114465308	0.160487394	0.028368932	0.001763479	0.743235298	0.148644446	0.022505403	0.215586281	0.03931516	0.168778021	0.072794198	0.051078203	0.763726682	0.210908429	0.666666667	0.5	0.5	0.333333333	0.333333333	0.5	0.666666667	0.5	0.333333333	0.5	0.5	0.333333333	0.333333333	0.666666667	0.354232641	0.119858887	0.490842951	0.335031129	0.032434953	0.031658058	0.970670556	0.205815566	0.11336438	0.25078997	0.445833217	0.055533479	0.178958845	0.183290887	1
0.261559046	0.391833531	0.352786493	0.01448996	0.453846234	0.115141866	0.187189041	0.261627278	0.128884653	0.361254127	0.147379302	0.187397819	0.391097967	0.11580217	0.666666667	0.5	0.75	0	0.666666667	0.25	0.333333333	0.25	0.333333333	0.75	0.5	0.333333333	0.333333333	0.333333333	0.240789066	0.077551576	0.102560918	0.345214042	0.035819837	0.193796417	0.409784989	0.281212667	0.20740267	0.023313917	0.129804415	0.390280408	0.149569668	0.208052578	1
0.178444417	0.196203222	0.377486259	0.017145298	0.752562535	0.380043095	0.054716484	0.272305486	0.101563759	0.341541875	0.242067023	0.18546536	0.483842754	0.363878884	0.666666667	0.5	0.5	0.333333333	0.333333333	0.5	0.666666667	0.5	0.333333333	0.5	0.5	0.333333333	0.333333333	0.666666667	0.105060037	0.048401365	0.062649468	0.213325785	0.033358366	0.033621235	0.963968249	0.090768845	0.173410917	0.060215971	0.102989303	0.219662844	0.068891218	0.12740071	1
0.191989729	0.335240028	0.206580032	0.023229874	0.493205204	0.438271841	0.278565822	0.491315123	0.126214581	0.265167206	0.27133936	0.288740054	0.22551723	0.087200233	0.333333333	0.25	0.5	0.333333333	0.333333333	0.5	0.666666667	0.5	0.333333333	0.25	0.5	0.333333333	0	0.333333333	0.068082777	0.270530094	0.145644001	0.283861907	0.080219108	0.192851098	0.620339156	0.133872187	0.169434194	0.181909879	0.223791174	0.364909459	0.462810089	0.115519946	1
0.25511989	0.253614972	0	0.011846229	0.702070978	0.200039315	0.103566739	0.33680242	0.045804648	0.405969519	0.066667504	0.176427322	0.233156697	0.005550327	0.666666667	0.5	0.5	0.333333333	0.333333333	0.5	0.666666667	0.5	0.333333333	0.5	0.5	0.333333333	0.333333333	0.333333333	0.046436108	0.027305655	0.533403153	0.285220018	0.005605485	0.003747237	0.617996249	0.12392577	0.220557248	0.058219133	0.18708656	0.184476875	0.504527171	0.38571468	1
0.220079536	0.321969568	0.267941092	0.034433308	0.326079589	0.167471503	0.249133192	0.209498045	0.156717483	0.29197984	0.419804662	0.114629232	0.208700922	0.296114786	1	0.75	0.75	0.666666667	0.666666667	0.25	1	0.25	0.666666667	0.5	0.75	0.333333333	0.333333333	0.333333333	0.104129066	0.148578813	0.230617803	0.641053167	0.172292234	0.618410075	0.698913009	0.24386998	0.176025347	0.099178015	0.322890657	0.244984262	0.279848181	0.108112248	0
0.197480826	0.125445516	0.162676091	0.016197658	0.08316959	0.255287557	0.069072793	0.428965571	0.103040346	0.2161708	0.260189428	0.184177931	0.01797848	0.220491697	0.333333333	0.25	0.5	0.333333333	0	0.75	0.333333333	0.75	0.333333333	0.25	0.5	0.333333333	0.333333333	0.333333333	0.156349705	0.394145615	0.168596855	0.725298821	0.275590007	0.893778307	0.685374143	0.141690862	0.205863665	0.160321067	0.244598557	0.334226732	0.90604718	0.109390475	0
0.104323531	0.029528876	0.249934131	0.034598418	0.469388113	0.086262997	0.337212728	0.178139355	0.066704012	0.175642364	0.329981915	0.172744961	0.338817172	0.136439518	0.333333333	0.25	0.25	0	0.333333333	0.25	0.666666667	0.25	0.333333333	0.5	0.5	0.333333333	0.333333333	0.666666667	0.279698897	0.221724313	0.255707646	0.45916099	0.102245613	0.495439219	0.801459317	0.268690944	0.11692712	0.512682643	0.110373661	0.084338564	0.437414385	0.144959374	1
0.15027969	0.005222365	0.245878299	0.015640646	0.298946305	0.076272823	0.156304572	0.083181854	0.060309521	0.199802311	0.280107132	0.115520205	0.279843809	0.110659318	0.333333333	0.25	0.5	0	0.333333333	0.25	0.666666667	0.25	0.333333333	0.5	0.5	0.333333333	0.333333333	0.666666667	0.4529772	0.452868159	0.064699534	0.63902283	0.157870186	0.773738903	0.685416931	0.300701224	0.23899281	0.289116571	0.231222285	0.178981329	0.509688668	0.136766632	1
0.207148844	0.013062283	0.371032835	0.025941581	0.603176164	0.28438039	0.41267701	0.433615049	0.032043903	0.204965196	0.232900148	0.255621084	0.547711422	0.378558892	0.333333333	0.25	0.5	0.333333333	0.333333333	0.5	0.666666667	0.5	0.333333333	0.5	0.5	0.333333333	0.333333333	0.666666667	0.312126527	0.201050294	0.090141955	0.178232357	0.092314802	0.247080795	0.561910941	0.3443933	0.155262195	0.344313515	0.093578697	0.184209356	0.137637042	0.131528787	1
0.384700885	0.186709404	0.164980476	0.013004776	0.020872436	0.13856644	0.058847253	0.132727733	0.08750694	0.239237018	0.11391545	0.05980646	0.058418091	0.071877272	0.666666667	0.5	0.5	0.333333333	0	0.5	0.666666667	0.5	0.333333333	0.5	0.5	0.333333333	0.666666667	0.333333333	0.283839147	0.607806886	0.068578117	0.856531255	0.379102741	0.952207742	0.921921884	0.216194602	0.148171506	0.112117279	0.585527536	0.289263582	0.907646746	0.160747083	1
0.176560455	0.160375637	0.195317686	0.073662484	0.32788091	0.104281566	0.185114466	0.248772991	0.209341206	0.346427977	0.515799673	0.127695235	0.159716361	0.18811689	0.333333333	0.25	0.5	0.666666667	0.333333333	0.25	0.666666667	0.25	1	0.5	0.5	0.333333333	0.333333333	0.666666667	0.109034929	0.419623212	0.451637455	0.456409211	0.119764293	0.342874119	0.71456448	0.211055642	0.120467516	0.189047646	0.080415014	0.26243268	0.472374181	0.101947703	0
0.125383851	0.008811295	0.339750011	0.040499251	0.200143375	0.101064372	0.148517634	0.069135307	0.044124002	0.169174602	0.274103612	0.058116577	0.332418377	0.105911798	0.333333333	0.25	0.5	0.333333333	0.333333333	0.5	0.666666667	0.5	0.333333333	0.5	0.5	0.333333333	0.333333333	0.333333333	0.235754179	0.450962553	0.2592757	0.484005338	0.183943864	0.659659284	0.706128493	0.217779988	0.127631732	0.207288429	0.130815757	0.211179932	0.479878473	0.097949102	1
0.260220482	0.03672044	0.403080447	0.011013632	0.003390297	0.079792887	0.072402757	0.161226536	0.090122028	0.108804049	0.167092777	0.220204162	0.023037929	0.24755396	0.666666667	0.5	0.5	0.333333333	0.333333333	0.25	0.333333333	0.5	0.333333333	0.5	0.5	0.333333333	0.333333333	1	0.32962929	0.778437054	0.083736331	0.933603035	0.289424767	0.962769459	0.966190559	0.129898719	0.096245132	0.225760096	0.782810053	0.314758783	0.971695323	0.144025881	0
0.442233563	0.099308117	0.240210143	0.01721944	0.002440356	0.169794564	0.131331602	0.299909932	0.168943754	0.457895162	0.226648571	0.129392743	0.012982146	0.491318449	0.333333333	0.25	0.75	0	0	0.25	0.333333333	0.25	0	0.75	0.75	0	0.666666667	1	0.194042359	0.476988148	0.255348054	0.920532386	0.685787312	0.949443568	0.977129686	0.299804834	0.111651268	0.127275222	0.194321255	0.429695858	0.953868886	0.077528781	1
0.222419895	0.225532012	0.461958506	0.018749415	0.684515879	0.104144757	0.20204679	0.293706397	0.144115538	0.325547277	0.163728074	0.150175709	0.390565324	0.036702863	0.333333333	0.25	0.5	0	0.333333333	0.25	0.666666667	0.25	0.333333333	0.5	0.25	0	0.333333333	0	0.230902848	0.184214289	0.044781954	0.503774059	0.025227114	0.484834675	0.932370654	0.257548534	0.16432785	0.09151363	0.139136389	0.577350058	0.111987942	0.157651287	1
0.155058435	0.267362104	0.200900841	0.031957357	0.385238734	0.077310067	0.176479601	0.154945075	0.106595416	0.283048149	0.247093942	0.126199816	0.256456893	0.162746931	0.333333333	0.25	0.75	0.333333333	0.333333333	0.25	0.666666667	0.25	0.333333333	0.75	0.5	0.333333333	0.666666667	0.666666667	0.156613257	0.312676077	0.695782171	0.418222962	0.152185413	0.404332757	0.474378961	0.09426982	0.088527176	0.207204106	0.076968524	0.104072227	0.318369141	0.055698162	0
0.081592959	0.138725967	0.321359986	0.025349584	0.403194668	0.150913265	0.016986095	0.41578303	0.14614735	0.208989805	0.081881227	0.281412778	0.197975278	0.127046385	0	0	0.25	0.666666667	0.333333333	0.25	0	0.25	0	0.25	0.25	0.333333333	0.666666667	0.333333333	0.281753371	0.284155102	0.088733964	0.234991371	0.042513384	0.463543483	0.915413693	0.231242649	0.241464844	0.234911008	0.34637879	0.153966542	0.386686561	0.07119223	0
0.398869352	0.499611696	0.273293748	0.631984139	0.505910281	0.132644381	0.106520117	0.351444772	0.123298918	0.337157025	0.144331949	0.152313936	0.142201207	0.074035921	0.666666667	0.5	0.5	1	0.333333333	0.5	0.666666667	0.5	0.333333333	0.5	0.5	0.333333333	0.333333333	0.333333333	0.065708234	0.44961679	0.208852698	0.251863121	0.198195999	0.784645796	0.943302438	0.129480841	0.124682525	0.176445103	0.621497929	0.310560296	0.698360351	0.162875603	1
0.115002889	0.159961551	0.06082269	0.024011403	0.493425979	0.135223133	0.213693182	0.260858944	0.069313665	0.178676792	0.235028083	0.138488299	0.295355668	0.309944031	0.333333333	0.25	0.25	0.333333333	0	0.5	1	0.5	0.333333333	0.5	0.5	0	0.333333333	1	0.337743268	0.243050451	0.778113613	0.236778694	0.081196995	0.011414151	0.278411385	0.078086555	0.131409434	0.390859581	0.056255819	0.255389431	0.532060698	0.125402585	1
0.077090662	0.011594197	0.356736097	0.047034911	0.312809024	0.192304984	0.167698699	0.261906787	0.063466114	0.156831966	0.262026569	0.119933749	0.344998802	0.057406612	0.333333333	0.25	0.5	0.333333333	0.333333333	0.5	1	0.5	0.333333333	0.5	0.5	0.333333333	0.333333333	0.333333333	0.370525196	0.302312314	0.037379792	0.373299455	0.071654671	0.259490536	0.849367628	0.191484635	0.140343165	0.18438466	0.115912177	0.071739506	0.262097537	0.120508891	1
0.32009596	0.31280128	0.323302577	0.033306012	0.406639681	0.100366017	0.055520685	0.186637959	0.107997064	0.163589505	0.151512301	0.363074432	0.394564142	0.168176752	0.333333333	0.25	0.5	0.666666667	0.666666667	0.25	0.666666667	0.25	0.666666667	0.25	0.5	0.333333333	0.666666667	0.333333333	0.240752241	0.359565007	0.172884752	0.35252521	0.134046525	0.823021118	0.982121693	0.223867695	0.115982658	0.230713043	0.435071908	0.088066265	0.412164706	0.177948159	0
0.304765773	0.341856518	0.68456986	0.033445518	0.656742776	0.177401447	0.040126097	0.278134223	0.063166231	0.141707601	0.203425317	0.068085191	0.756480125	0.330705574	0.666666667	0.5	0.5	0.333333333	0.333333333	0.5	0.666666667	0.5	0.333333333	0.5	0.5	0	0.333333333	0.666666667	0.092498153	0.087250375	0.026112518	0.153345966	0.024958414	0.115549753	0.987530947	0.091508164	0.151137142	0.186182963	0.070163278	0.260180942	0.071520839	0.080853468	1
0.369182758	0.359747828	0.213224684	0.555353324	0.339609855	0.184412137	0.080299376	0.216145998	0.126205124	0.418783303	0.181237424	0.176099207	0.139412829	0.039443289	0.666666667	0.5	0.75	1	0.666666667	0.25	1	0.25	0.333333333	0.5	0.25	0	0.666666667	0.333333333	0.100469874	0.251561207	0.167697237	0.068447207	0.05312625	0.284205154	0.804115596	0.326383056	0.131138838	0.285349197	0.231579023	0.352016613	0.477888244	0.191968064	1
0.093107726	0.133333367	0.258171008	0.04415226	0.657420459	0.313572269	0.18773817	0.258917609	0.053492418	0.218952133	0.201209647	0.182870434	0.529557197	0.243762645	0.333333333	0.25	0.5	0.333333333	0.333333333	0.5	0.666666667	0.5	0.333333333	0.5	0.5	0.333333333	0.333333333	0.666666667	0.402328099	0.162488641	0.475208139	0.269106747	0.055301495	0.0743047	0.470545146	0.158944789	0.129389939	0.29738146	0.092205943	0.178022072	0.289917134	0.122689143	1
0.250602919	0.017771772	0.315339748	0.005375019	0.260146739	0.091971408	0.108123783	0.131806549	0.070306101	0.278903989	0.159103346	0.146658129	0.088824155	0.034197761	0.333333333	0.25	0.5	0	0.333333333	0.25	1	0.25	0.333333333	0.5	0.5	0.333333333	0.333333333	0.333333333	1	0.659327532	0.087764692	0.865959735	0.158052947	0.894707478	0.950410899	0.341896154	0.15711259	0.237399617	0.42700756	0.158849469	0.930566463	0.206264173	0
0.548250526	0.294906509	0.122647662	0.482977035	0.255139446	0.195749377	0.08035051	0.492535024	0.134599832	0.211844994	0.270126945	0.207661514	0.007245691	0.045148705	1	0.75	0.5	1	0	0.25	0.333333333	0.75	0.333333333	0.5	0.75	0.333333333	0.333333333	0	0.131360988	0.263307532	0.208326718	0.18561315	0.199466199	0.934598388	0.821781251	0.201960456	0.094481035	0.142032027	0.109442472	0.161684255	0.923453596	0.097503161	1
0.369479132	0.38342515	0.288445638	0.104202168	0.344117869	0.15820597	0.224738184	0.371834157	0.237086444	0.406920529	0.372903712	0.312200972	0.15987793	0.14106269	0.666666667	0.5	0.5	1	0.333333333	0.25	0.666666667	0.25	0.333333333	0.5	0.5	0.333333333	0.333333333	0.666666667	0.202233262	0.323125899	0.156558577	0.263199016	0.196879171	0.77082661	0.929882154	0.198557383	0.147949114	0.15522433	0.185493561	0.23091881	0.529466518	0.118327196	1
0.137311194	0.248594748	0.378426173	0.028198184	0.418286186	0.100167719	0.06253183	0.220008366	0.08968162	0.282512731	0.103960089	0.098846331	0.194535209	0.644238642	0.333333333	0.25	0.75	0.666666667	0.666666667	0.25	1	0.25	0.333333333	0.75	0.5	0.333333333	0.666666667	1	0.14859573	0.168577227	0.023085457	0.387384033	0.06535153	0.355993559	0.970340777	0.128026601	0.174298366	0.169061684	0.755912004	0.153429758	0.53135806	0.057812874	1
0.212800976	0.084320337	0.370503036	0.007136937	0.396645784	0.120771955	0.079553095	0.200531643	0.144973311	0.258972726	0.166601416	0.15729397	0.189491277	0.031879719	0.333333333	0.25	0.75	0	0.666666667	0.25	0.333333333	0.25	0.666666667	0	0.25	0	0.666666667	0.333333333	0.220687829	0.345384035	0.051848039	0.831778274	0.065681338	0.474030028	0.934477136	0.260309051	0.16977211	0.203607188	0.27622955	0.405732309	0.288495109	0.161684612	0
0.219678009	0.118899546	0.176639045	0.020801614	0.040914817	0.096301035	0.09550336	0.262105775	0.156731735	0.114600758	0.400862368	0.344528761	0.004547209	0.068070126	0.666666667	0.5	0.5	0.333333333	0.333333333	0.5	1	0.5	0.666666667	0.75	0.75	0.333333333	0.666666667	0.666666667	0.104669309	0.760884396	0.058274804	0.799042884	0.267257811	0.964116113	0.971331628	0.171066322	0.13003701	0.220814502	0.315856345	0.26966836	0.987127339	0.268232659	1
0.145585384	0.24146067	0.16085286	0.024844522	0.71445798	0.473000305	0.147525777	0.467473621	0.124581034	0.354084224	0.223453368	0.241121699	0.343749598	0.164354543	0.333333333	0.25	0.5	0.333333333	0.333333333	0.5	1	0.5	0.333333333	0.5	0.75	0.333333333	0.333333333	0.666666667	0.288537901	0.345600228	0.634217947	0.369135653	0.114061519	0.316321507	0.90068356	0.560739301	0.731369501	0.052473377	0.394206838	0.691896621	0.418880225	0.361800177	1
0.209513346	0.214311527	0.469108043	0.046483191	0.487223092	0.099518934	0.220292268	0.22011756	0.164765581	0.33607012	0.460600372	0.304428747	0.260243879	0.221814184	0.333333333	0.25	0.5	0.666666667	0.333333333	0.25	0.666666667	0.25	0.333333333	0.5	0.5	0	0.333333333	0.666666667	0.156989796	0.421697083	0.247098852	0.347206667	0.168157582	0.586555339	0.811402642	0.154852965	0.129340714	0.143361445	0.085695425	0.167214275	0.391866001	0.080875815	0
0.132627492	0.199420047	0.260267795	0.047645801	0.754364146	0.143574142	0.056590746	0.328533193	0.109000822	0.151009038	0.098134196	0.110301339	0.222108555	0.081582121	0.333333333	0.25	0.5	0.666666667	0.666666667	0.25	0.666666667	0.25	0	0.5	0.75	0	0.333333333	0.333333333	0.400930775	0.138040633	0.054221379	0.375473634	0.040399905	0.322234527	0.967486451	0.367969961	0.360881545	0.252171015	0.863728517	0.500178238	0.672957179	0.133774196	1
0.191534516	0.150395114	0.151965094	0.045050174	0.354732388	0.071082635	0.093922403	0.087889884	0.07834405	0.169919155	0.211786854	0.162198454	0.529872869	0.070514975	0.666666667	0.5	0.5	0.666666667	0.666666667	0	0.666666667	0.25	0	0.25	0.5	0.333333333	0.333333333	0	0.151125882	0.487879256	0.383905814	0.529268861	0.200615014	0.708737827	0.93722152	0.840477192	0.862137109	0.226689218	0.759827835	0.548621798	0.478337149	0.379488969	1
0.285130082	0.310466527	0.127776561	0.014003855	0.102623009	0.004516451	0.217136013	0.476439654	0.359923296	0.298289686	0.280782524	0.25189678	0.00373234	0.029132069	0.666666667	0.5	0.25	0.666666667	0	0	0.333333333	0.75	0.666666667	0.25	0.75	0.333333333	0.666666667	0	0.025682417	0.262128287	0.226409107	0.73040197	0.142971603	0.78873435	0.93530132	0.250664739	0.255454714	0.232163658	0.122286693	0.205072894	0.911808777	0.125003059	1
0.106197283	0.136292158	0.493482498	0.033935431	0.598017407	0.461176189	0.177554675	0.166057104	0.123373589	0.366474524	0.237431045	0.138191234	0.413668497	0.187537418	0.333333333	0.25	0.5	0.333333333	0.333333333	0.25	0.666666667	0.25	0.333333333	0.5	0.25	0.333333333	0.333333333	0.666666667	0.119363204	0.390483843	0.530058925	0.485203954	0.141216543	0.786908546	0.918080848	0.093291428	0.180403806	0.321915212	0.373867885	0.202474208	0.423100512	0.112256995	1
0.175896956	0.17228703	0.449882009	0.028914662	0.232310956	0.16047162	0.109503814	0.236808926	0.157179123	0.260627955	0.121380705	0.18254981	0.226435731	0.102898236	0.333333333	0.25	0.5	0.666666667	0	0.25	0.666666667	0.25	0.333333333	0.5	0.5	0.333333333	0.333333333	0.666666667	0.243598031	0.583370023	0.145461223	0.518172393	0.23665118	0.880099164	0.973855989	0.134400289	0.186743692	0.162185792	0.777014383	0.212069808	0.645330501	0.122649172	1
0.082423584	0.221507436	0.080120438	0.058660665	0.484304436	0.129527161	0.06124639	0.323896029	0.092051729	0.149035283	0.070134598	0.116910879	0.399425496	0.091954977	0.333333333	0.25	0.75	0.666666667	0	0.25	1	0.25	0.333333333	0.5	0.5	0	0.333333333	1	0.211093821	0.148402136	0.854465524	0.329385667	0.074331521	0.266526618	0.978349256	0.157782833	0.158204681	0.065533998	0.487025307	0.204547148	0.345075933	0.092445326	1
0.153927195	0.20638901	0.395303906	0.031816269	0.643104035	0.133383982	0.031494612	0.19732722	0.20202919	0.217846969	0.118483896	0.277261545	0.298989007	0.030646843	0.333333333	0.25	0.5	0.666666667	0.333333333	0.25	0.333333333	0.25	0.333333333	0.25	0.75	0.333333333	0.333333333	0.333333333	0.207791128	0.246554153	0.050594477	0.157310808	0.071128756	0.616400835	0.955441888	0.362977314	0.093405091	0.369600055	0.355488381	0.168211171	0.208770608	0.105079655	1
0.112036343	0.007588226	0.818067148	0.041186423	0.847264901	0.361120105	0.200750596	0.565520335	0.131322374	0.171597048	0.122259918	0.227796679	1	0.065193363	0.333333333	0.25	0.5	0.333333333	0.333333333	0.5	0.666666667	0.5	0.333333333	0.5	0.5	0.333333333	0.333333333	0.333333333	0.405841441	0.087113708	0.038400623	0.232027591	0.020665149	0.013683261	0.977468937	0.287536783	0.206854348	0.135938716	0.269558779	0.407863037	0.072903277	0.329215618	1
0.219850906	0.114626362	0.441118162	0.015513513	0.680013112	0.324838379	0.450388471	0.400821977	0.168658842	0.326627686	0.376621625	0.327076556	0.249609564	0.053120672	0.333333333	0.25	0.5	0.333333333	0.333333333	0.5	0.666666667	0.5	0.333333333	0.5	0.5	0.333333333	0.333333333	0.666666667	0.204108245	0.474059002	0.055518974	0.381539924	0.131361871	0.450229938	0.528289846	0.22781532	0.159191385	0.197695975	0.109141211	0.164678332	0.41427711	0.10596159	1
0.178690778	0.240446875	0.051612061	0.02478527	0.731725514	0.346673765	0.106910496	0.442116413	0.100948382	0.292045955	0.317067469	0.173067629	0.266970363	0.199421512	0.666666667	0.5	0.5	0.333333333	0.333333333	0.5	0.666666667	0.5	0.333333333	0.5	0.5	0.333333333	0.333333333	0.666666667	0.1579115	0.172130645	0.897444213	0.228692784	0.117349671	0.219972744	0.821137967	0.114720197	0.100799277	0.215602842	0.076730662	0.103657804	0.539515332	0.057673464	0
0.433553505	0.263385777	0.290836193	0.021336454	0.01304319	0.13152431	0.015191604	0.178045567	0.336769706	0.290416944	0.223402695	0.13637469	0.037670472	0.190324109	0.333333333	0.25	0.75	0	0.666666667	0.25	0.333333333	0.25	1	0.25	0.75	0.333333333	1	0.333333333	0.131126844	0.248759628	0.039338283	0.888596844	0.588252559	0.933217973	0.961036228	0.080670786	0.082978167	0.293014312	0.147049774	0.173021106	0.49989041	1	1
0.202944968	0.078511949	0.285786356	0.036595384	0.46423631	0.322504548	0.157175911	0.297029935	0.109452632	0.280656777	0.722095335	0.149765802	0.462398315	0.200609506	0.333333333	0.25	0.5	0.333333333	0.333333333	0.5	1	0.5	0.333333333	0.5	0.5	0	0.333333333	0.666666667	0.274792304	0.232055255	0.034852583	0.281829984	0.059665712	0.175464942	0.971512838	0.21048484	0.162233334	0.049856608	0.135495302	0.374824804	0.207954668	0.118820274	0
0.207402703	0.234471224	0.241699505	0.008934333	0.792503687	0.228066392	0.03557299	0.534215377	0.10246578	0.230328222	0.220918711	0.135978957	0.262902853	0.349496605	0.666666667	0.5	0.5	0.666666667	0.333333333	0.75	0.666666667	0.75	0.333333333	0.5	0.5	0.333333333	0.333333333	1	0.219489768	0.029552816	0.479445036	0.403012567	0.02331332	0.066135184	0.968438182	0.203299815	0.209674546	0.20700646	0.112273636	0.30485891	0.08056233	0.123692493	1
0.149315799	0.029714754	0.416112242	0.032276939	0.427452292	0.097102349	0.132700568	0.225385892	0.237238876	0.220532536	0.186546577	0.23962651	0.15631564	0.243931107	0.333333333	0.25	0.5	0.333333333	0.333333333	0.25	0.666666667	0.25	1	0.5	0.5	0.333333333	0.333333333	0.666666667	0.255544987	0.497030662	0.114235714	0.484085022	0.176915467	0.674690049	0.923896944	0.352123183	0.129895592	0.354717347	0.363421413	0.357210083	0.562190844	0.217442173	1
0.366773818	0.157897026	0.401136463	0.0131223	0.001857901	0.070306385	0.039548389	0.186876164	0.230828002	0.166479721	0.195502575	0.240297838	0.014381523	0.295256492	1	0.75	0.75	0	0.333333333	0.25	0.333333333	0.25	0.666666667	0.25	0.25	0.666666667	0.666666667	0.666666667	0.229706057	0.194553789	0.033845741	0.824834552	0.690004669	0.891346279	0.86937624	0.276124964	0.092334248	0.424512802	0.099935204	0.123186455	0.948120211	0.145410945	1
0.269712596	0.100076495	0.140577983	0.017007905	0.217902497	0.106890146	0.08933428	0.118461909	0.14099973	0.351444927	0.296000692	0.254701695	0.064901022	0.100176716	0.333333333	0.25	0.75	0	0.666666667	0.25	0.666666667	0.25	0.666666667	0.25	0.75	0.666666667	0	0.666666667	0.063085871	0.296318556	0.340707823	0.413978485	0.076018461	0.569656805	0.907092318	0.248950708	0.103032075	0.061773259	0.226841011	0.067399157	0.471659019	0.154975688	1
0.401406011	0.36280608	0.35842098	0.017165023	0.219628356	0.136903101	0.138983845	0.328092986	0.248396575	0.251511022	0.217346707	0.212493297	0.21815348	0.251977006	0.666666667	0.5	0.5	0.333333333	0.333333333	0.5	0.666666667	0.5	0.333333333	0.5	0.5	0.333333333	0.666666667	1	0.210229917	0.503071796	0.132115362	0.668614733	0.177605715	0.879746139	0.948106951	0.307792312	0.088737392	0.186882947	0.723697316	0.132299456	0.532562694	0.035618223	0
0.248614519	0.106474695	0.285846205	0.032595674	0.561306751	0.124789999	0.24105803	0.227153401	0.128255503	0.249982223	0.300324342	0.281539532	0.300756157	0.146036466	0.333333333	0.25	0.25	0	0.333333333	0.25	0.666666667	0.25	0.666666667	0.5	0.25	0.333333333	0.333333333	0.333333333	0.049316178	0.266553991	0.083855329	0.386051848	0.067596624	0.349906201	0.97361786	0.108671224	0.134294675	0.155460562	0.089408094	0.074514715	0.286678766	0.086229072	1
0.256984714	0.10714515	0.244210334	0.018935604	0.288661169	0.216997597	0.151233749	0.31024803	0.167561126	0.514256451	0.334857922	0.145371754	0.149939503	0.073187924	0.333333333	0.25	0.5	0.333333333	0.333333333	0.5	0.666666667	0.5	0.333333333	0.5	0.5	0	0.333333333	0.666666667	0.253494374	0.469242204	0.076314643	0.550014654	0.163575186	0.457578572	0.912818093	0.161602645	0.101957325	0.182092248	0.081279959	0.295841701	0.56886574	0.131096061	1
0.219850758	0.374879509	0.279590611	0.016200998	0.175323218	0.09172113	0.115549657	0.165110109	0.131997185	0.329346528	0.107405177	0.165994769	0.421766145	0.576761821	0.666666667	0.75	0.5	0	0.666666667	0.25	1	0.25	0.333333333	0.5	0.25	0.333333333	0.333333333	0.666666667	0.092225756	0.139478521	0.104962455	0.406616053	0.038448413	0.484157401	0.973546503	0.200797951	0.084067182	0.306704283	0.772017454	0.036817059	0.219934939	0.058473596	1
0.25126955	0.106476265	0.145096248	0.009733618	0.000567374	0.133241408	0.0752543	0.146121741	0.076607486	0.06768773	0.08535368	0.182158592	0.040280877	0.279705124	0.333333333	0.25	0.5	0	0.333333333	0.25	0.333333333	0.25	0.333333333	0	0.25	0.333333333	0	0.333333333	0.061914316	0.52750796	0.002199415	0.896806805	0.197558517	0.95279828	0.940347502	0.177952842	0.058765255	0.207717968	0.307301615	0.055259454	0.807365463	0.094603371	1
0.258948207	0.340050633	0.175940806	0.014693088	0.482654748	0.17376035	0.176605745	0.296679063	0.166580119	0.355433729	0.15426341	0.170757541	0.153022717	0.145047367	0.666666667	0.5	0.75	0.333333333	0	0.25	0.666666667	0.25	0.333333333	0.75	0.75	0	0.666666667	0.333333333	0.1702238	0.233636374	0.904930157	0.610722626	0.154326003	0.800430587	0.807463191	0.172950294	0.139730779	0.201090325	0.519327861	0.314421517	0.545523832	0.136590555	1
0.337776987	0.133138119	0.280845462	0.016955438	0.033206596	0.108721512	0.118945273	0.294642502	0.148226579	0.348749664	0.131403938	0.242305925	0.063617863	0.047434622	0.666666667	0.5	0.5	0.333333333	0.333333333	0.5	0.666666667	0.5	0.333333333	0.5	0.75	0.333333333	0.666666667	0.666666667	0.097238443	0.698039472	0.052092029	0.844903464	0.393674954	0.956721526	0.947193575	0.210817992	0.124164999	0.128099613	0.815267651	0.226651442	0.837343385	0.171580164	1
0.101351535	0.106546025	0.304481718	0.03982181	0.358187374	0.171862119	0.149404807	0.150695506	0.090356724	0.24763827	0.498672607	0.187916878	0.311281237	0.311678143	0.333333333	0.25	0.5	0.333333333	0.333333333	0.5	0.666666667	0.5	0.333333333	0.5	0.5	0.333333333	0.333333333	1	0.182181612	0.261103562	0.241284574	0.332631887	0.082677859	0.306828762	0.940103502	0.251328766	0.102662638	0.1229118	0.078821708	0.163564997	0.314532597	0.14576908	0
0.130723284	0.149292891	0.437948927	0.01203097	0.435125348	0.141725722	0.132937342	0.276556136	0.161038392	0.293436847	0.235028741	0.199125706	0.206881368	0.212947033	0.333333333	0.25	0.5	0	0.666666667	0.25	0.666666667	0.25	0.333333333	0.5	0.5	0.333333333	0.333333333	1	0.147929586	0.346388369	0.018098316	0.608692154	0.058386827	0.688527286	0.815557142	0.17225349	0.128477065	0.099692246	0.205095287	0.12750125	0.292225005	0.087641474	1
0.14426253	0.127642387	0.509115711	0.039140659	0.685966009	0.125273094	0.114687985	0.329475329	0.111797007	0.227332501	0.108707247	0.216268548	0.528900659	0.46924856	0.333333333	0.25	0.5	0.333333333	0.333333333	0.5	0.666666667	0.5	0.333333333	0.5	0.25	0.333333333	0.333333333	0.666666667	0.251352471	0.274654525	0.087890256	0.375741782	0.064342855	0.349351745	0.782569007	0.218044578	0.111092183	0.043031494	0.27789974	0.227120992	0.317842062	0.050469077	1
0.176339618	0.050094766	0.327601012	0.049636581	0.424895991	0.157430294	0.276105139	0.430370112	0.182223786	0.360682944	0.295128849	0.23526505	0.279961229	0.221776833	0.333333333	0.25	0.5	0.333333333	0.333333333	0.5	1	0.5	0.333333333	0.5	0.5	0.333333333	0.333333333	1	0.258631019	0.40174042	0.40907691	0.61460555	0.082452003	0.448288685	0.739097513	0.171233315	0.132529498	0.236894918	0.18646807	0.174972183	0.391311352	0.194293229	0
0.153724631	0.317796002	0.170794355	0.029417754	0.393127892	0.141048388	0.200128948	0.271879347	0.146063434	0.326409686	0.310316325	0.173669028	0.200849283	0.085627051	0.333333333	0.25	0.25	0.666666667	0.333333333	0.25	1	0.25	0.666666667	0.75	0.5	0.333333333	0.666666667	0.333333333	0.161136263	0.25580407	0.445192407	0.55697129	0.176559747	0.504042464	0.537195646	0.069803459	0.159333503	0.224644581	0.395303929	0.52289522	0.560567924	0.083897776	0
0.322528353	0.12577096	1	0.009193754	0.024497091	0.056420182	0.041433135	0.217724658	0.211174365	0.241216162	0.158928691	0.296466051	0.000926961	0.469100695	0.333333333	0.25	0.75	0	0	0.25	0.333333333	0.25	0.666666667	0.5	0.25	0.333333333	0.333333333	0.333333333	0.107099741	0.078481042	0.396009691	1	0.867527266	0.896698097	0.846191474	0.187908998	0.069040441	0.157562054	0.095585812	0.080459305	0.981629829	0.132000402	1
0.19095839	0.019481063	0.495920867	0.105887953	0.719937419	0.126118231	0.44503402	0.145748278	0.096549898	0.302835077	0.342105344	0.172031949	0.278136436	0.053333094	0.333333333	0.25	0.5	1	0.333333333	0.25	0.666666667	0.25	0.333333333	0.5	0.5	0.333333333	0.333333333	0.666666667	0.2026817	0.389236595	0.049033624	0.212925297	0.087795374	0.626650333	0.321720728	0.290943271	0.132334442	0.186808929	0.301560207	0.237747915	0.3315545	0.214463906	1
0.144871183	0.158648118	0.304884162	0.026109414	0.845459824	0.294843888	0.057144137	0.477572254	0.135626846	0.239401608	0.123183393	0.23281775	0.518015759	0.204925419	0.666666667	0.5	0.5	0.333333333	0.333333333	0.5	0.666666667	0.5	0.333333333	0.5	0.5	0.333333333	0.333333333	0.666666667	0	0.249331377	0.257424579	0.365590449	0.16071777	0.261288994	0.990696189	0.454823653	0.704852289	0.129123502	0.506957843	0.661118089	0.263140735	0.456636918	1
0.296828375	0.090272221	0.09484901	0.014524001	0.235910157	0.181227162	0.326696913	0.517485505	0.183570903	0.375833911	0.38500745	0.149638137	0.116859835	0.145666802	0.333333333	0.25	0.5	0.333333333	0.333333333	0.5	0.666666667	0.5	0.333333333	0.5	0.5	0	0.333333333	0.666666667	0.4904064	0.371142548	0.813647246	0.23507765	0.050919179	0.36206895	0.704199459	0.211486716	0.108345542	0.390474226	0.113375934	0.272157138	0.319754533	0.133514011	0
0.283385109	0.121740743	0.128318901	0.012972429	0.028430126	0.115817902	0.1592693	0.244152643	0.124754485	0.062271286	0.080796088	0.121877721	0.098556369	0.081610403	0.666666667	0.5	0.25	0.333333333	0.333333333	0.5	0.666666667	0.5	0.333333333	0	0.5	0.333333333	1	0.333333333	0.044328675	0.281465464	0.08943547	0.885327524	0.670565033	0.872960599	0.466897258	0.1385011	0.22491619	0.33658465	0.244282237	0.22915751	0.357830276	0.113665593	1
0.1536106	0.028431402	0.389544218	0.032809777	0.352298335	0.126888494	0.143160775	0.190915793	0.130893261	0.298572624	0.188081635	0.149527226	0.321917873	0.217537312	0.333333333	0.25	0.5	0.333333333	0.333333333	0.25	0.666666667	0.25	0.333333333	0.5	0.5	0.333333333	0.333333333	0.666666667	0.279964568	0.438076368	0.082683327	0.464679162	0.087681144	0.631979678	0.857104373	0.24026051	0.211857576	0.26872028	0.349990176	0.345237222	0.436358663	0.137669542	1
0.159199155	0.015572267	0.305341149	0.039090828	0.45152104	0.196884	0.178843267	0.399438858	0.123577383	0.250098342	0.236692831	0.187151297	0.272649473	0.191408659	0.333333333	0.25	0.5	0.333333333	0.333333333	0.5	1	0.5	0.333333333	0.5	0.5	0.333333333	0.333333333	0.666666667	0.202403842	0.366161008	0.194704549	0.415713725	0.152605492	0.512301191	0.841534007	0.319207546	0.196323679	0.286795787	0.259513418	0.347216446	0.597697115	0.249224716	1
0.178502863	0.156537813	0.227054245	0.026594818	0.427965009	0.103720984	0.133113427	0.254877052	0.09427476	0.219569627	0.110030778	0.112430683	0.338489679	0.084446434	0.333333333	0.25	0.75	0.333333333	0.666666667	0.5	1	0.5	0.333333333	0.25	0.25	0	0	0.333333333	0.282140907	0.249942641	0.508467841	0.351301361	0.047232414	0.077641908	0.884569457	0.201969402	0.102589473	0.177995414	0.401591885	0.452917485	0.310002722	0.145401965	1
0.097742304	0.007435782	0.240366394	0.022002589	0.167608449	0.051181277	0.10356135	0.028255166	0	0.16663099	0.470866271	0.001683621	0.211279303	0.265196345	0.333333333	0.25	0.25	0	0.333333333	0.25	0.666666667	0.25	0.333333333	0.5	1	0	0.333333333	1	0.197458633	0.47010543	0.265658557	0.650594457	0.213462201	0.682288348	0.982897176	0.170016583	0.128166021	0.140667351	0.261774667	0.158519035	0.69073313	0.150534415	1
0.291315281	0.075840109	0.78213444	0.011719359	0.005193023	0.072767274	0.041321069	0.1443048	0.121677971	0.092609971	0.066998155	0.075953295	0.011575514	0.167086822	0.333333333	0.25	1	0	0	0.25	0.333333333	0.25	0.333333333	0.25	0.25	0	0.666666667	0.666666667	0.17638511	0.372295621	0.105147904	0.991659088	0.914280581	0.838156612	0.970294656	0.650988013	0.487091109	0.446159472	0.713466988	0.997956462	1	0.245117742	1
0.308361835	0.097406917	0.158010527	0.006936015	0.183230417	0.175404039	0.030082294	0.197811937	0.145749725	0.364044309	0.280028083	0.106691721	0.127119672	0.020812727	0.333333333	0.25	0.5	0	0.666666667	0.5	0.333333333	0.5	0.666666667	0	0.5	0	0	0	0.386268798	0.536197998	0.279832597	0.669956702	0.168764968	0.555594846	0.880468314	0.616082492	0.427927338	0.483578132	0.567636087	0.846383919	0.745811976	0.467477584	1
0.145783312	0.108086618	0.444224325	0.150645252	0.535081717	0.114082358	0.028213707	0.149856649	0.13256232	0.244488626	0.231358667	0.183392569	0.324727311	0.045023896	0.333333333	0.25	0.5	1	1	0.25	0.333333333	0.25	0.666666667	0.25	0.75	0.333333333	0.666666667	0.333333333	0.242090122	0.818571042	0.236090478	0.357487122	0.20121824	0.782917464	0.991252145	0.615299701	0.548878546	0.167220193	0.709584279	0.627068178	0.450951249	0.339952226	0
0.142288409	0.164097539	0.107644211	0.042694877	0.010356976	0.08458531	0.044782297	0.178213771	0.114198551	0.093469057	0.232396854	0.216092385	0.023642915	0.073539604	0.333333333	0.75	0.75	1	0	0.25	0.333333333	0.25	0.666666667	0.75	0.75	0.666666667	1	0.333333333	0.474435098	0.172908561	0.234112263	0.710018411	0.75750046	0.884576402	0.831111619	0.563872252	0.166640154	0.471657192	0.06962676	0.308170325	0.93044796	0.581853025	1
0.248446012	0.075875458	0.36558144	0.034180703	0.000106907	0.094882136	0.043016264	0.416436243	0.187982174	0.200513219	0.139557393	0.106988242	0.00046589	0.087384526	0.666666667	0.5	0.75	0.333333333	0	0.5	0.333333333	0.5	0.333333333	0.25	0.75	0	1	0.333333333	0.131638494	0.039627135	0.035115838	0.960306717	0.954227106	0.977094996	0.967892924	0.195579875	0.109765098	0.858930007	0.642026547	0.425296037	0.842333588	0.333882444	1
0.210931909	0.462172768	0.0206826	0.045874134	0.351114588	0.190506672	0.144768311	0.310172279	0.044200911	0.229999835	0.212110634	0.155743303	0.267704008	0.069567685	0.333333333	0.25	0.75	0.666666667	0	0.25	1	0.25	0.666666667	0.25	0.75	0	0	1	0.262604885	0.132182641	0.436519594	0.343648497	0.057081483	0.324357094	0.97737299	0.186074455	0.094770655	0.262678004	0.070117977	0.31018341	0.458187267	0.184903645	0
0.156385704	0.255960375	0.319281723	0.021439613	0.62154886	1	0.233850018	0.549198284	0.115313103	0.578584608	0.306797125	0.297196448	0.320339486	0.152076346	0.333333333	0.25	0.5	0.333333333	0.333333333	0.5	0.666666667	0.5	0.333333333	0.5	0.5	0.333333333	0.333333333	0.666666667	0.215758661	0.352350064	0.048207193	0.276127022	0.074733435	0.389610435	0.908196089	0.369453398	0.151111325	0.121052582	0.23257908	0.220078612	0.270349645	0.123624347	0
0.079639799	0.155903602	0.278099152	0.033664979	0.473745504	0.547717383	0.209960655	0.465702563	0.093937421	0.247427957	0.153995365	0.284182889	0.223787205	0.388364725	0.333333333	0.25	0.5	0.333333333	0.333333333	0.5	0.666666667	0.5	0.333333333	0.5	0.5	0.333333333	0.333333333	0.666666667	0.421309207	0.112658156	0.03805075	0.193087075	0.012082608	0.05078894	0.418218773	0.171577487	0.11398128	0.524640846	0.62777117	0.104656329	0.16384078	0.109302901	1
0.111515433	0.017037492	0.506783626	0.049771544	0.423937424	0.083512899	0.186281454	0.147118078	0.082304656	0.064132479	0.279839916	0.168854146	0.300361242	0.147512813	0.333333333	0.25	0.5	0.333333333	0.333333333	0.25	0.666666667	0.25	0.333333333	0	0.5	0.333333333	0.333333333	0.666666667	0.426910257	0.449621063	0.03519886	0.469980742	0.142036017	0.508621616	0.917724088	0.287934736	0.141481172	0.460962828	0.113379136	0.157086935	0.571687967	0.208298256	1
0.330421559	0.214394028	0.217861492	0.00850035	0.208434981	0.124214198	0.090856036	0.168961754	0.114065192	0.342331686	0.217209167	0.120197452	0.351961903	0.107938105	0.666666667	0.5	0.5	0	0	0.25	0.333333333	0.25	0.333333333	0.5	0.5	0.333333333	0.333333333	0.333333333	0.351240337	0.695171029	0.271975281	0.776940353	0.314006797	0.852384572	0.976327765	0.492696597	0.559323422	0.256836604	0.709407546	0.817318664	0.614014999	0.308972141	1
0.230616355	0.239449549	0.209303498	0.01219195	0.562797526	0.147925477	0.227726111	0.231367963	0.470228478	0.441586401	0.276204525	0.256975257	0.173405013	0.061800916	0.333333333	0.25	0.5	0	0.666666667	0.25	0.666666667	0.25	1	0.25	0.25	0.333333333	0	0	0.195908109	0.652306022	0.68996325	0.727053594	0.151700577	0.721672046	0.988791993	0.937715309	0.539435175	0.252391101	0.706337778	0.782489016	0.651722465	0.802621642	0
0.178476574	0.103536577	0.176333032	0.01843999	0.47743526	0.174539196	0.043640713	0.297193432	0.078124458	0.348594292	0.36062749	0.164786553	0.231811862	0.134830677	0.333333333	0.25	0.25	0.333333333	0.333333333	0.5	0.666666667	0.5	0.333333333	0.5	0.5	0.333333333	0.333333333	0.666666667	0.121851952	0.400770337	0.057132139	0.333632119	0.09643876	0.60094009	0.973309718	0.270942064	0.124945665	0.097528529	0.250595215	0.171187273	0.344164328	0.114062536	0
0.311362438	0.390854955	0.49051457	0.017527817	0.461832117	0.137976104	0.095476282	0.065248159	0.054656653	0.090212376	0.193101401	0.202872265	0.245137226	0.146221989	1	0.75	0.5	0	0.666666667	0.25	0.666666667	0.25	0.333333333	0.25	0.75	0.666666667	0	0.666666667	0.218558571	0.217907765	0.02627244	0.434850854	0.076148082	0.497800138	0.938424465	0.396286064	0.132872659	0.296986552	0.602431035	0.440687138	0.377083799	0.141409552	1
0.19732312	0.49143391	0.159743746	0.126310487	0.868117507	0.134536364	0.056223974	0.200965185	0.175259418	0.193789764	0.165201078	1	0.47717738	0.0078925	0.666666667	0.5	0.5	1	0.333333333	0.25	0.666666667	0.25	0.333333333	0.5	0.5	1	0.333333333	0.333333333	0.014645455	0.337678626	0.928475986	0.317895883	0.141838266	0.791924853	0.994138521	0.748156856	0.555823889	0.07292816	0.729474558	0.18030977	0.321171996	0.47347851	1
0.114565875	0.013872087	0.019550261	0.042590453	0.504884721	0.249019509	0.213877498	0.070930495	0.04795418	0.284774048	0.150211328	0.230505873	0.393937082	0.124096458	0.333333333	0.25	0.5	0.333333333	0.333333333	0.25	0.666666667	0.25	0.333333333	0.5	0.5	0.333333333	0.333333333	0.666666667	0.340601364	0.196668105	0.800686153	0.180364634	0.042426453	0.069023055	0.889740553	0.571657663	0.11180398	0.350725626	0.030827687	0.113997577	0.144394863	0.159362286	1
0.145751253	0.164623208	0.348264146	0.036392055	0.619977648	0.134584025	0.275988867	0.281702758	0.093459505	0.475702837	0.242213005	0.336204918	0.454373116	0.092682622	0.333333333	0.25	0.5	0.333333333	0.666666667	0.25	0.666666667	0.25	0.333333333	0.5	0.5	0.333333333	0.333333333	0.666666667	0.389927528	0.420188454	0.109482059	0.332509336	0.056920089	0.652330842	0.78908216	0.335307508	0.150335186	0.256947329	0.145626829	0.232826275	0.423282763	0.123976886	0
0.1486977	0.173189346	0.379535949	0.032919205	0.54321477	0.243309059	0.190847864	0.285109578	0.052997425	0.209857494	0.086815691	0.241912729	0.29602691	0.083147925	0.333333333	0.25	0.5	0.333333333	0.666666667	0.5	0.666666667	0.5	0.333333333	0.5	0.25	0.333333333	0.333333333	1	0.390285514	0.42033666	0.01391799	0.365852539	0.055999248	0.344992392	0.8828435	0.178360636	0.106786201	0.291435671	0.257651602	0.116315708	0.329495546	0.115148119	1
0.208473129	0.297564343	0.513226028	0.028134036	0.309130286	0.092462733	0.187975686	0.30336514	0.149462423	0.310893171	0.286242426	0.232035544	0.228844041	0.20494494	0.666666667	0.5	0.5	0.333333333	0.333333333	0.25	0.333333333	0.25	0.333333333	0.5	1	0.333333333	0.333333333	0.666666667	0.154292264	0.133312851	0.244831748	0.407570519	0.073593369	0.593053675	0.582850651	0.285184792	0.115559329	0.236938649	0.147126713	0.099620097	0.549293923	0.143812624	0
0.271838973	0.076499496	0.211276618	0.020262333	0.283324575	0.165081983	0.128790046	0.538269749	0.224011245	0.237081767	0.128616812	0.291398923	0.156090126	0.142045333	0.666666667	0.25	0.5	0.666666667	0.666666667	0.75	0.666666667	0.75	0.333333333	0.75	0.5	0.333333333	0.666666667	0.333333333	0.230179773	0.737720214	0.300946316	0.889398941	0.209346177	0.870595308	0.957916968	0.184472987	0.128488778	0.195723623	0.758119925	0.257885649	0.746386677	0.123079385	1
0.358815211	0.07678921	0.099867332	0.005164242	0.00248326	0.142228114	0.158794618	0.226348508	0.289935859	0.230582083	0.100567863	0.343251904	0.069455181	0.050197489	0.333333333	0.25	0.25	0	0	0.25	0.333333333	0.25	0.333333333	0	0.75	0.333333333	0.666666667	0.333333333	0.224316972	0.487703934	0.073107853	0.753554917	0.482646264	0.804879673	0.935049487	0.361015224	0.111454355	0.459259508	0.840373419	0.156456888	0.339931922	0.20633696	1
0.318289631	0.053763098	0.376738446	0.016995329	0.005924906	0.075931654	0.054650203	0.166679432	0.104079907	0.263810916	0.110137548	0.225323378	0.052825064	0.694950432	0.333333333	0.25	0.75	0	0	0.25	0.333333333	0.25	0.333333333	0.5	0.5	0.333333333	1	1	0.173982376	0.594962936	0.030530255	0.818351608	0.485937015	0.889755404	0.927628937	0.142754163	0.091189582	0.493568703	0.273297382	0.070002835	0.601326232	0.177978474	1
0.213094439	0.331030854	0.191761377	0.026859503	0.48486027	0.119271841	0.813788061	0.125024164	0.105509847	0.212395593	0.272653988	0.193555864	0.254592822	0.082691726	0.666666667	0.75	0.5	0.333333333	0.333333333	0.25	0.666666667	0.25	0.666666667	0.5	0.5	0	0.333333333	0.333333333	0.167364045	0.07864027	0.065607089	0.265365921	0.025078164	0.303392568	0	0.269297429	0.109918477	0.166089945	0.054772492	0.290490239	0.212761034	0.148604726	1
0.227464088	0.126700244	0.318881418	0.015122418	0.58362011	0.150229351	0.28344577	0.247590895	0.270808356	0.403346129	0.845464469	0.142186707	0.162671905	0.213705726	0.333333333	0.25	0.5	0	0.333333333	0.25	0.666666667	0.25	1	0.5	0.5	0	0	0.666666667	0.158377715	0.259004011	0.047753089	0.530915371	0.05127837	0.597588252	0.711468382	0.338714423	0.038654696	0.129438159	0.16383299	0.468543419	0.547543297	0.158978779	0
0.130774085	0.118071208	0.408146204	0.058743841	0.435410173	0.115534274	0.188317977	0.207245209	0.068285745	0.147308549	0.196676146	0.184990063	0.436150403	0.247557802	0.333333333	0.25	0.5	0.333333333	0	0.25	0.666666667	0.25	0.333333333	0.25	0.5	0	0.333333333	0.333333333	0.348175886	0.390105899	0.243114715	0.462367967	0.200727576	0.705155107	0.784841616	0.237526547	0.089259968	0.285904068	0.092630914	0.081092128	0.353042348	0.139630256	1
0.267440054	0.134808145	0.175075886	0.01113812	0.08003842	0.112113906	0.121403482	0.24082174	0.21599911	0.282658133	0.17576881	0.157460339	0.038222743	0.071240776	0.666666667	0.5	0.5	0.333333333	0.333333333	0.5	0.666666667	0.5	1	0.5	0.5	0.333333333	0.333333333	0.666666667	0.097384913	0.532711866	0.277556654	0.862991057	0.21350914	0.923586269	0.899355174	0.142521841	0.074138642	0.214760188	0.415246822	0.226368003	0.86720288	0.155136922	0
0.400537235	0.238912511	0.160234358	0.017200777	0.003218202	0.128176666	0.070081349	0.444135064	0.222328707	0.020300777	0.067984512	0.261104778	0.028082112	0.14564098	0.666666667	0.5	0.5	0	0	0.25	0.333333333	0.25	0.666666667	0.25	0.25	0.333333333	0.666666667	1	0.140242346	0.506222903	0.004105537	0.834252225	0.619243146	0.967114547	0.946569928	0.147622678	0.051892253	0.609742629	0.34939293	0.11414795	0.930265653	0.13006805	1
0.2139752	0.068480716	0.215857955	0.027319641	0.293705687	0.263632485	0.600625504	0.444604007	0.149760255	0.285013753	0.333659623	0.271761984	0.17837531	0.081354944	0.333333333	0.25	0.5	0.333333333	0.333333333	0.5	0.666666667	0.5	0.333333333	0.5	0.5	0.333333333	0.333333333	0.666666667	0.289789041	0.367798029	0.618482961	0.511936666	0.113365492	0.640127838	0.712835231	0.148135023	0.124272693	0.252433593	0.204241913	0.184828814	0.40517205	0.278338617	1
0.092793474	0.120255027	0.44618603	0.038044741	0.750331883	0.475600803	0.061351941	0.442015361	0.097180647	0.313243033	0.033052166	0.18113786	0.560448511	0.075314755	0.333333333	0.25	0.5	0.333333333	0.333333333	0.5	0.666666667	0.5	0.333333333	0.5	0.5	0.333333333	0.333333333	0.333333333	0.231415283	0.185388115	0.03293294	0.158535691	0.020014419	0.082349788	0.96152291	0.143014849	0.162789191	0.298581855	0.34212928	0.144228586	0.364731762	0.170487856	1
0.111740192	0.099085731	0.051188644	0.693788435	0.392535295	0.188498697	0.067445046	0.351410452	0.101076812	0.297875749	0.202415435	0.189186407	0.002655901	0.048204843	0.333333333	0.25	0.25	1	0.666666667	0.5	1	0.5	0	0.75	0.75	0.666666667	0.666666667	0.333333333	0.166749587	0.151578111	0.457753281	0	0.013844917	0.914147037	0.9831325	0.076059298	0.140216429	0.35205606	0.158087666	0.168076893	0.984710174	0.135477017	1
0.263905496	0.243976302	0.058049917	0.016950445	0.289706964	0.124692417	0.418826165	0.248048415	0.193560158	0.204246944	0.360349957	0.169903324	0.214276467	0.079049199	0.333333333	0.25	0.75	0.333333333	0.333333333	0.25	1	0.25	0.333333333	0	0.5	0.333333333	0	0.333333333	0.211017425	0.276317672	0.454915161	0.536537424	0.057789207	0.355769153	0.553074937	0.166641935	0.092575909	0.399583362	0.114246765	0.240993032	0.507302554	0.13715649	1
0.336438941	0.065200425	0.190617426	0.012542832	0.012343117	0.095259287	0.113133942	0.274881144	0.304097106	0.332949609	0.131515803	0.203571713	0.005377203	0.031856971	0.666666667	0.5	0.5	0.666666667	0.333333333	0.5	0.333333333	0.5	0.666666667	0.5	0.5	0.666666667	0.666666667	0.333333333	0.275573272	0.651527632	0.119493896	0.877107502	0.218705638	0.94858878	0.966855432	0.227752329	0.133186184	0.080976187	0.523174108	0.297387305	0.929033498	0.134171965	1
0.258402118	0.162734657	0.336954506	0.018249154	0.438930138	0.08689139	0.164241064	0.212281341	0.121793534	0.233920088	0.295527248	0.233533053	0.119203222	0.161875264	0.333333333	0.25	0.5	0	0.333333333	0.25	0.666666667	0.25	0.333333333	0.25	0.25	0.333333333	0.333333333	0.333333333	0.208837756	0.512319232	0.043295873	0.54540564	0.120040376	0.572521929	0.872412232	0.373469971	0.098267297	0.164437849	0.080749589	0.066653857	0.629165529	0.265597473	1
0.660354415	0.451312861	0.096623962	0.032437125	0.34011362	0.247166881	0.249789153	0.34815259	0.145787101	0.234920294	0.216955719	0.221700316	0.099114737	0.196164019	1	0.75	0.5	0.666666667	0.333333333	0.75	0.666666667	0.75	0.333333333	0.5	0.75	0.333333333	0.333333333	1	0.046097913	0.117899582	0.796328274	0.265585051	0.128020792	0.361232719	0.630615613	0.22675271	0.111428792	0.13928907	0.306305086	0.01843158	0.473422813	0.292822855	1
0.247478618	0.195467999	0.219654349	0.031936899	0.372284347	0.250349928	0.386885827	0.395463163	0.3869442	0.280846752	0.407623631	0.216043227	0.183379546	0.098257849	0.333333333	0.25	0.75	0.666666667	0	0.5	0.666666667	0.5	0.666666667	0.5	0.5	0.333333333	0.666666667	0.333333333	0.427194619	0.462446481	0.098616794	0.376332153	0.116248643	0.618460271	0.735621404	0.309397644	0.078046762	0.222163645	0.360830552	0.386893419	0.693243349	0.098235077	0
0.382354485	0.083913442	0.277531124	0.003647706	0.007504298	0.105744326	0.049735787	0.175357624	0.181285482	0.018225729	0.090960346	0.288180046	0.083514829	0.349802173	0.666666667	0.25	0.75	0.333333333	0.333333333	0.5	0.333333333	0.5	0.666666667	0	0.5	0.666666667	1	0	0.162288435	0.442765449	0.067157092	0.93107869	0.387128712	0.956180755	0.930395845	0.17908924	0.104690744	0.358259254	0.28668502	0.182269062	0.716199046	0.133450379	0
0.153176742	0.154092371	0.161597211	0.04496059	0.64138736	0.187773907	0.088392063	0.112778606	0.135155137	0.242082907	0.256840768	0.175473697	0.321752746	0.082608417	0.333333333	0.25	0.25	0	0.666666667	0.25	1	0.25	0.666666667	0.25	0.5	0.333333333	0	0.333333333	0.291075389	0.204946895	0.58769268	0.453523182	0.090354072	0.54795305	0.925756981	0.347659188	0.100223725	0.261496283	0.0876721	0.161107049	0.498563484	0.168189796	0
0.10275757	0.106081712	0.190009509	0.028135334	0.335201114	0.123223354	0.136935719	0.275057947	0.135533154	0.302470296	0.118695068	0.118212265	0.216100162	0.006398323	0.333333333	0.25	0.75	0.333333333	0.666666667	0.25	0.333333333	0.25	0.333333333	0.5	0.5	0	0.333333333	0.333333333	0.259862487	0.536643261	0.225813688	0.418234147	0.062448267	0.651197591	0.820189426	0.129732194	0.27830216	0	0.560473088	0.383545617	0.531270309	0.255343055	1
0.125265184	0.131354343	0.353865134	0.059420718	0.647529058	0.182946837	0.132414417	0.0671026	0.139435127	0.628235996	0.252151054	0.240476518	0.267360505	0.26027652	0.333333333	0.25	0.5	0.666666667	0.333333333	0.25	0.666666667	0.25	0.333333333	0.5	0.5	0.333333333	0.333333333	0.666666667	0.243144634	0.302321481	0.100879303	0.251882906	0.056862317	0.585373042	0.946525742	0.326327914	0.190138248	0.06552675	0.190193888	0.159926832	0.470555045	0.122511542	1
0.11623985	0.161271952	0.215925475	0.043947725	0.780165289	0.335200606	0.249487389	0.498149662	0.109594169	0.333348638	0.180430423	0.303089936	0.570318193	0.285010444	0.333333333	0.25	0.5	0.333333333	0.333333333	0.5	0.666666667	0.5	0.333333333	0.5	0.5	0.333333333	0.333333333	0.666666667	0.354293669	0.171327315	0.517583798	0.125899874	0.053994312	0.134761923	0.936313525	0.22494462	0.125007121	0.17090383	0.137978415	0.203719787	0.136579706	0.079583059	1
0.279259382	0.421073743	0.68082639	0.132215885	0.614368036	0.117063733	0.055664451	0.317642133	0.408287461	0.147028935	0.105545865	0.194533838	0.419626739	0.241657025	0.666666667	0.5	0.5	1	0.333333333	0.25	0.666666667	0.25	1	0.25	0.5	0.333333333	0.666666667	0.666666667	0.138830499	0.113605779	0.045897932	0.532840871	0.045515498	0.376864843	0.936257004	0.319386658	0.019579553	0.280065871	0.452773727	0.175805054	0.372734285	0.182512358	1
0.426617113	0.088915292	0.374963156	0.722515405	0.357850009	0.01008911	0.080168978	0.070197779	0.087370225	0.364978195	0.091998843	0.083551251	0.215445656	0.140205318	0.333333333	0.25	0.5	1	0	0	0.333333333	0.25	1	0.5	0.25	0	0.333333333	0.666666667	0.297517151	0.388748225	0.033690812	0.268379681	0.107061891	0.78690251	0.9271197	0.303205568	0.080860011	0.291059339	0.265351016	0.389015785	0.288485862	0.082159358	0
0.224130417	0.008788214	0.34350833	0.024789995	0.387126658	0.217129716	0.356647078	0.356685756	0.179437458	0.281637657	0.466890524	0.243706342	0.258012559	0.199955333	0.333333333	0.25	0.5	0.333333333	0.333333333	0.5	0.666666667	0.5	0.333333333	0.5	0.5	0.333333333	0.333333333	0.666666667	0.133046795	0.453318512	0.149052321	0.492740688	0.118819671	0.491981744	0.820973834	0.203582094	0.129849941	0.081881253	0.199846013	0.222580627	0.472480607	0.099222141	1
0.266002132	0.154607016	0.185429481	0.005425807	0.296242125	0.087557916	0.043932834	0.153905042	0.082223432	0.319776349	0.382533584	0.063688965	0.188597928	0	0.333333333	0.25	0.25	0.666666667	0.333333333	0.25	0.666666667	0.25	0.666666667	0.5	0.5	0	0.333333333	0.333333333	0.228285999	0.419420358	0.143962826	0.367751872	0.146766147	0.587987862	0.66556851	0.307682393	0.122445119	0.163020773	0.136492582	0.342911332	0.404065821	0.147313122	0
0.475842555	0.305378076	0.232805897	0.067289186	0.504650531	0.095021744	0.036529971	0.128083458	0.101815212	0.381012867	0.190878381	0.131664323	0.256283842	0.013743477	0.666666667	0.5	0.5	1	0.333333333	0.25	0.666666667	0.25	0.333333333	0.5	0.5	0.333333333	0.333333333	0.333333333	0.097845194	0.0576819	0.027884755	0.042207757	0.050115389	0.295652612	0.917186567	0.421118292	0.089549959	0.098777036	0.050478823	0.159079699	0.170935851	0.23189463	0
0.204658153	0.060330534	0.317272049	0.016706965	0.322065303	0.12840887	0.295461865	0.326981845	0.179934742	0.345355159	0.239688769	0.221742757	0.151539869	0.122634867	0.333333333	0.25	0.5	0	0.333333333	0.25	0.666666667	0.25	0.333333333	0.5	0.5	0.333333333	0.333333333	0.333333333	0.166661817	0.525953322	0.058759622	0.756916556	0.195457188	0.736583747	0.725520072	0.118706474	0.206993154	0.12924105	0.333172306	0.342844179	0.652620525	0.136599151	1
0.424184991	0.27237563	0.58699119	0.016915197	0.405718126	0.123233623	0.291136948	0.197424062	0.218461446	0.035841651	0.043095354	0.220245762	0.263967339	0.101747592	0.333333333	0.25	0.75	0.666666667	0	0.25	1	0.25	0.666666667	0	0.75	0.333333333	0.666666667	0.333333333	0.139133805	0.266728672	0.045044227	0.340974782	0.173846907	0.719893225	0.791614792	0.351431137	0.10977373	0.749677125	0.823514927	0.437272958	0.660765328	0.173431387	1
0.334538531	0.230441934	0.324412846	0.04084622	0.49803675	0.118103035	0.068740562	0.144094873	0.108660553	0.132939447	0.054232675	0.208320026	0.38958077	0.027123746	0.333333333	0.25	0.25	0.666666667	0.333333333	0.25	0.666666667	0.25	0.666666667	0.25	0.25	0.333333333	0.333333333	0.333333333	0.267429951	0.069746278	0.088021404	0.224851093	0.013718311	0.311980162	0.796103455	0.200963398	0.146953549	0.26876711	0.147392974	0.256658886	0.465284021	0.220064865	1
0.168530604	0.055278915	0.305338404	0.017339951	0.342324721	0.133047447	0.419607731	0.215472229	0.171266817	0.393943549	0.4263934	0.253259957	0.235973015	0.299778064	0.333333333	0.25	0.5	0	0.333333333	0.25	0.666666667	0.25	0.333333333	0.5	0.25	0.333333333	0.333333333	0.666666667	0.110296369	0.217975521	0.159804896	0.690660126	0.094994119	0.683312174	0.698269922	0.167911817	0.132290938	0.107882197	0.216346893	0.160311406	0.372723356	0.105942733	0
0.144348325	0.071915167	0.195991195	0.006259754	0.002007689	0.142600241	0.153799402	0.487985314	0.148285213	0.176424639	0.098051471	0.120209483	0.0026576	0.238346965	0.333333333	0.25	0.75	0.666666667	0	0.75	0.333333333	0.75	0.666666667	0.25	0.75	0	0.666666667	0.333333333	0.343142267	0.462319408	0.023560928	0.888623225	0.588282557	0.950332381	0.968138081	0.139493461	0.158382581	0.406632106	0.270941027	0.409721382	0.947185221	0.1238078	1
0.241409522	0.127166699	0.41682861	0.015823577	0.002659198	0.132052266	0.06543369	0.45933871	0.268631758	0.187893007	0.091153036	0.250210003	0.00771505	0.117258228	0.333333333	0.25	0.75	0.666666667	0	0.5	0.333333333	0.75	0.666666667	0.5	0.75	0.666666667	0.666666667	0.333333333	0.115903378	0.363699063	0	0.955982641	0.737227266	0.966289215	0.945973424	0.182389998	0.106667237	0.197252009	0.907432857	0.129891553	0.977974072	0.157545891	1
0	0.13673894	0.226139794	0.1108837	0.376529397	0.103365948	0.090076879	0.1113486	0.075650401	0.101392021	0.31734316	0.096968803	0.641720012	0.033550658	0.333333333	0.25	0.25	0.666666667	0.666666667	0.25	1	0.25	0.666666667	0.75	0.75	0	0.666666667	0.333333333	0.526880189	0.187354716	0.079179138	0.010912647	0.02854484	0.301068187	0.957957435	0.381011917	0.218087823	0.480328449	0.086508947	0.748847957	0.09114414	0.224242254	1
0.114504667	0.344706149	0.024705903	0.050709912	0.568128449	0.145349152	0.016266074	0.108807516	0.078968245	0.248499571	0.165160787	0.092629406	0.320214271	0.082504358	0.666666667	0.5	0.25	0.666666667	0.333333333	0.25	0.666666667	0.25	0.333333333	0.5	0.5	0.333333333	0.333333333	0.666666667	0.120469655	0.022150332	0.95911884	0.21298498	0.016898371	0.167871414	0.968831757	0.303822464	0.189198967	0.178252756	0.083152914	0.584968402	0.128782025	0.190157649	0
0.410439039	0.28685139	0.241408341	0.038523644	0.668944639	0.074312694	0.095289328	0.035821671	0.097346612	0.285991638	0.21550167	0.232991371	0.331919252	0.114220534	0.666666667	0.5	0.5	1	0.333333333	0.25	0.666666667	0.25	0.333333333	0.5	0.5	0.333333333	0	0.333333333	0.086424292	0.085069285	0.874964737	0.19884015	0.086559425	0.363890371	0.415289189	0.416089535	0.172000491	0.125471649	0.22487277	0.313056874	0.21382194	0.391902677	1
0.084832377	0.014858358	0.477127582	0.051483913	0.371025056	0.178823962	0.134682699	0.236955251	0.027154982	0.224141689	0.051320863	0.093336767	0.243440086	0.541212523	0.333333333	0.25	0.75	0.666666667	0.333333333	0.75	1	0.75	0.333333333	0.75	0.25	0.333333333	0.666666667	1	0.132084006	0.481508641	0.017080764	0.440397607	0.09111753	0.306501701	0.960272094	0.158797844	0.109824331	0.116031291	0.274402745	0.231114659	0.360747351	0.12621143	1
0.217397576	0.078400679	0.178692156	0.010376476	0.143072158	0.112105119	0.100535354	0.225378057	0.158287281	0.237253962	0.242067877	0.117674734	0.088482105	0.046684229	0.666666667	0.5	0.5	0.333333333	0	0.5	0.666666667	0.5	0.333333333	0.5	0.5	0.333333333	0.666666667	0.333333333	0.093717649	0.671810856	0.141217855	0.807797281	0.306087582	0.914767777	0.914963955	0.131352084	0.162964497	0.161141385	0.597338009	0.270441226	0.758521217	0.189820675	1
0.129278654	0.710537859	0.303920053	0.043972613	0.713427735	0.410400166	0.037920569	0.469895678	0.101914738	0.216711811	0.109776935	0.161581258	0.238444246	0.047082789	0.333333333	1	0.75	0.666666667	1	1	0.666666667	1	0.666666667	0.5	0.25	0	0.333333333	0	0.235321561	0.09735329	0.57391085	0.551667422	0.047225026	0.326255377	0.949078055	0.005304429	0.120541794	0.207869876	0.743819446	0.343737837	0.587833745	0.291389188	1
0.198432362	0.569980468	0.080216151	0.02006429	0.638653105	0.318469374	0.186162904	0.42737512	0.149757617	0.097283558	0.193501575	0.151426202	0.426054613	0.100878384	0.666666667	0.5	0.75	0.333333333	0.333333333	0.5	1	0.5	0.666666667	0.5	0.75	0.333333333	0.333333333	0.666666667	0.251442721	0.350162024	0.559455152	0.680877967	0.137761008	0.382855919	0.945480982	0.241508249	0.194002126	0.596997779	0.284303684	0.535139398	0.475256754	0.371578212	1
0.191090671	0.138174663	0.135957418	0.029913855	0.383208599	0.084856462	0.04244695	0.133552	0.012512249	0.153597935	0.043535543	0.163068647	0.167993836	0.021085709	0.333333333	0.25	0.75	0.666666667	0.666666667	0.25	0.666666667	0.25	0	0.25	0.25	0.666666667	0.333333333	0.333333333	0.120031217	0.451510515	0.893646236	0.44553237	0.119787361	0.722208373	0.913994462	0.244313173	0.233795645	0.231756134	0.626383857	0.384315982	0.600662333	0.376001256	1
0.17179266	0.003974832	0.29177591	0.024561659	0.450446917	0.138964464	0.211019096	0.20608026	0.14691492	0.367216712	0.44434428	0.220456022	0.271250846	0.181988935	0.333333333	0.25	0.5	0.333333333	0.333333333	0.25	0.666666667	0.25	0.333333333	0.5	0.5	0.333333333	0.333333333	0.666666667	0.153581171	0.426066109	0.174938003	0.427766819	0.139816518	0.669683656	0.663470262	0.19532905	0.142732291	0.180088322	0.172099903	0.166292719	0.45446176	0.234101801	0
0.164295556	0.188690219	0.49497704	0.035186652	0.938800386	0.357054456	0.409666341	0.504088851	0.102832929	0.39653406	0.285495408	0.263041443	0.470234458	0.130761462	0.333333333	0.25	0.5	0.333333333	0.333333333	0.5	0.666666667	0.5	0.333333333	0.5	0.5	0.333333333	0.333333333	0.666666667	0.359410051	0.194830739	0.033968376	0.322605632	0.037466922	0.161992969	0.859909951	0.179739868	0.202271222	0.247538115	0.205103585	0.20177132	0.503535431	0.151123663	1
0.322886428	0.154188495	0.170483598	0.011923389	0.001423858	0.054620535	0.069299963	0.106671111	0.083240616	0.122535512	0.060069706	0.052112124	0.036129669	0.408026501	0.666666667	0.5	0.25	0	0	0.25	0.666666667	0.25	0.333333333	0.25	0.25	0.333333333	0.666666667	0.333333333	0.135244703	0.58595222	0.055305015	0.798416068	0.447296694	0.96571532	0.947550335	0.27593345	0.104813433	0.395858919	0.570769659	0.086624049	0.650848008	0.114142222	0
0.238844183	0.063557232	0.275930862	0.012837362	0.023609348	0.102517029	0.064189128	0.234229261	0.200427344	0.132174117	0.220967753	0.171187852	0.006229466	0.108455172	0.333333333	0.25	0.5	0.333333333	0.666666667	0.5	1	0.5	1	0.5	0.75	0.333333333	0.666666667	0.333333333	0.224898516	0.62199575	0.01241391	0.823593282	0.517296191	0.945389129	0.943273524	0.170758443	0.060096154	0.470318466	0.532918372	0.155020345	0.764296733	0.220741419	1
0.198279589	0.110512133	0.148678442	0.018568023	0.538979796	0.127432411	0.057466625	0.227820772	0.149326214	0.299880072	0.126406217	0.215586581	0.246564171	0.012577001	0.333333333	0.25	0.25	0	0.666666667	0.25	0	0.25	0.666666667	0.75	0.75	0.666666667	0	0.333333333	0.244249488	0.349521473	0.052123604	0.444994241	0.040707943	0.549884177	0.662737609	0.252721031	0.120783619	0.045977374	0.250486228	0.226883368	0.443938167	0.281191433	0
0.252028092	0.115444655	0.180649934	0.029699768	0.086361275	0.075043657	0.053709275	0.075436294	0.045423461	0.158935791	0.276981183	0.3398913	0.018495593	0.018194036	0.666666667	0.5	0.5	0.666666667	0.333333333	0.25	0.333333333	0.25	0	0.75	0.5	1	0.666666667	0	0.094053168	0.420864143	0.407919715	0.516717527	0.143790992	0.860844314	0.953681531	0.253472428	0.192193201	0.43926806	0.195752676	0.10109069	0.930446856	0.263521558	1
0.09906326	0.123727759	0.349738729	0.029913918	0.35826041	0.148733575	0.149610738	0.148702398	0.035706331	0.115448164	0.077278137	0.029612099	0.45864699	0.134013575	0.333333333	0.25	0.5	0.333333333	0	0.5	0.666666667	0.5	0	0.25	0.25	0	0.333333333	0.333333333	0.287068418	0.266294311	0.056079312	0.341008355	0.084187446	0.215956641	0.160077236	0.186703063	0.159794286	0.336950322	0.56344176	0.436043449	0.328626607	0.129721036	1
0.423531579	0	0.201147456	0.003690405	0.00694501	0.41480971	0.033150637	0.784432329	0.153186415	0.132206272	0.171354657	0.131632065	0.00331272	0.134879709	0.666666667	0.5	0.75	0	0	1	0.666666667	1	0.666666667	0.25	0.75	0	0	0	0.184116908	0.380515597	0.151284223	0.937406877	0.898759731	0.906260273	0.893540065	0.089227419	0.110907823	0.25410602	0.742216725	0.175036404	0.97827254	0.131239718	1
0.129114512	0.117630391	0.306372736	0.042534039	0.466861706	0.088153794	0.115167974	0.075699966	0.033094227	0.121480844	0.073892414	0.029042858	0.366607024	0.251606113	0.333333333	0.25	0.5	0.666666667	0	0.25	1	0.25	0.333333333	0.75	0.75	0	0.666666667	0.666666667	0.148438154	0.225406433	0.015271869	0.180643589	0.069291424	0.389674819	0.940061309	0.324606706	0.118771892	0.265872878	0.094001495	0.302714945	0.481405206	0.14081721	1
0.147085427	0.036678612	0.093973083	0.051159048	0.446103718	0.098678005	0.188800905	0.139169296	0.0763441	0.213188701	0.207896719	0.146199741	0.339544641	0.320729126	0.333333333	0.25	0.25	0.333333333	0.333333333	0.25	0.666666667	0.25	0.333333333	0.25	0.5	0.333333333	0	0.666666667	0.242646989	0.463180604	0.806699694	0.317920693	0.12421339	0.561045628	0.842431244	0.176434026	0.091873141	0.18662571	0.083734559	0.098686515	0.370046115	0.178923007	1
0.14575981	0.325037978	0.641604215	0.029676698	0.63366458	0.114252498	0.269684947	0.040394609	0.141303849	0.343118516	0.488258924	0.257406412	0.402653484	0.129128488	0.333333333	0.25	0.5	0.333333333	0.333333333	0.25	0.333333333	0.25	0.333333333	0.5	0.5	0	0.333333333	1	0.195774386	0.216561059	0.001237602	0.151666302	0.011106921	0.311408377	0.192963565	0.270467539	0.05186404	0.074210797	0.060902407	0.078306723	0.304644183	0.083909432	0
0.165646745	0.052282271	0.517321412	0.467449259	0.591132459	0.128199226	0.19940246	0.200260403	0.13440062	0.429647513	0.181899614	0.238560177	0.334347447	0.110173299	0.333333333	0.25	0.5	1	0.333333333	0.25	0.666666667	0.25	0.333333333	0.5	0	0.333333333	0.333333333	0.666666667	0.250717551	0.268399136	0.093477023	0.136083665	0.073931095	0.614164636	0.8788812	0.280188526	0.102864187	0.329180574	0.24336277	0.152749007	0.389366441	0.127627775	1
0.30288556	0.311244984	0.30032788	0.01154538	0.386620449	0.109001469	0.072089618	0.218195178	0.109936436	0.187077948	0.047793628	0.213346034	0.275387299	0.022639831	1	0.75	0.75	0	0.666666667	0.25	0.333333333	0.25	0	0.25	0.25	0.333333333	0.666666667	0.333333333	0.121193287	0.119980876	0.027581723	0.592114844	0.063506103	0.583210733	0.700527687	0.50904041	0.128962564	0.325531534	0.77381306	0.198841834	0.449093102	0.151429089	1
0.160661294	0.168207727	0.154897622	0.034825549	0.447001921	0.154865519	0.228515295	0.280410884	0.191502666	0.311923987	0.15788717	0.236300309	0.186268327	0.159560757	0.333333333	0.25	0.25	0.666666667	0	0.25	1	0.25	0.666666667	0.5	0.25	0	0.333333333	1	0.147910653	0.295898774	0.22976971	0.209707376	0.038990121	0.257292573	0.91549686	0.356255103	0.107498677	0.138294215	0.207012977	0.201911999	0.624466538	0.10129032	1
0.28859628	0.227814948	0.154122714	0.015674349	0.003434692	0.116687286	0.115180027	0.253698899	0.271600301	0.248390387	0.260029363	0.173941606	0.030654871	0.112989502	1	0.75	0.5	0.333333333	0.333333333	0.5	0.333333333	0.5	0.666666667	0.5	0.75	0.333333333	0.666666667	0.666666667	0.054297361	0.235626561	0.128434451	0.700807769	0.729445322	0.915191719	0.867181635	0.14292935	0.092564567	0.344815401	0.30725297	0.253354406	0.965328045	0.105303032	1
0.209603506	0.182990054	0.362764682	0.008095343	0.947450125	0.243961199	0.088551588	0.396346313	0.112406071	0.246003364	0.102189598	0.1957542	0.198313174	0.249689552	0.666666667	0.5	0.5	0.333333333	0.333333333	0.5	0.666666667	0.5	0.666666667	0.25	0.5	0	0	0.666666667	0.083520079	0.047035512	0.003210729	0.481164282	0.018394379	0.058485676	0.976000402	0.178089417	0.095771152	0.170540664	0.189153335	0.182647599	0.198083327	0.082534396	1
0.316943916	0.214917453	0.134637735	0.568108811	0.344031464	0.140464708	0.0753416	0.258860914	0.303825834	0.434740577	0.208361372	0.251315814	0.071392085	0.042257955	0.666666667	0.5	0.25	1	0.333333333	0.25	0.333333333	0.25	1	0.5	0.5	0.333333333	1	0.333333333	0.191073454	0.228588009	0.017373561	0.181916856	0.058482087	0.838089998	0.934590645	0.353279262	0.055330077	0.379475668	0.083872517	0.055456723	0.866227277	0.170964869	1
0.306907144	0.055656027	0.383426859	0.189136788	0.333624811	0.093012082	0.103202107	0.109226493	0.07745359	0.24951738	0.225777497	0.205359787	0.250322398	0.098964436	0.333333333	0.25	0.5	1	0.333333333	0.25	0.666666667	0.25	0.333333333	0.5	0.5	0.333333333	0.333333333	0.333333333	0.350753273	0.488189522	0.112482997	0.098364236	0.097597111	0.727859371	0.949461551	0.387146146	0.218780258	0.261221311	0.352613862	0.26840642	0.46790717	0.114960571	1
0.536217882	0.252421652	0.195374804	0.01676755	0.291670751	0.097456866	0.052891389	0.09642983	0.105834159	0.178080621	0.095357195	0.183018511	0.002141029	0.194932064	1	0.75	0.5	0	0.666666667	0.25	0.666666667	0.25	0.666666667	0.75	0.5	0.666666667	0.666666667	0.333333333	0.038491411	0.39880101	0.058223174	0.478659877	0.149758966	0.958115551	0.777608778	0.315828263	0.136044789	0.190485366	0.385828652	0.135005195	0.66697831	0.110829284	1
0.076397373	0.188877387	0.524101512	0.050312065	0.42448548	0.067843715	0.044556825	0.091756221	0.053875337	0.136677657	0.152329532	0.131974334	0.630675063	0.14434201	0.333333333	0.25	0.5	0.666666667	0.333333333	0.25	0.666666667	0.25	0.333333333	0.25	0.75	0.333333333	0.333333333	0.666666667	0.246250261	0.239647143	0.026546587	0.219210399	0.075477132	0.468139853	0.929045265	0.53012397	0.12979216	0.378966916	0.292214007	0.13515295	0.266520133	0.073825868	1
0.372465061	0.138445357	0.302233325	0.01042103	0.000744973	0.062100935	0.034088364	0.084752779	0.108740712	0.177845607	0.112536789	0.075594845	0.02497033	0.047190691	0.666666667	0.5	0.75	0.333333333	0.333333333	0.25	0.333333333	0.25	0.666666667	0.5	0.75	0	0.666666667	0.333333333	0.140000904	0.621505826	0.026004688	0.808160949	0.446237911	0.974143381	0.980232699	0.241457418	0.09225621	0.31383882	0.588112927	0.151820392	0.836398034	0.110118156	1
0.209950656	0.118402907	0.587315643	0.016221832	0.58231387	0.522834924	0.091994321	0.378225779	0.114987086	0.290470723	0.241669084	0.171146017	0.611210978	0.464953858	0.666666667	0.5	0.5	0.333333333	0.333333333	0.5	0.666666667	0.5	0.333333333	0.5	0.5	0.333333333	0.333333333	0.666666667	0.024077993	0.255665478	0.001351359	0.342435021	0.098369118	0.324357571	0.991667712	0.146220247	0.078238291	0.215023302	0.029564517	0.126547912	0.281481932	0.121929925	1
0.132798835	0.098596227	0.357307376	0.02579938	0.348515784	0.064528457	0.171712935	0.131816598	0.069993724	0.314587505	0.433257362	0.192017201	0.282361474	0.258683664	0.333333333	0.25	0.5	0.333333333	0.333333333	0.5	0.666666667	0.5	0.333333333	0.5	0.5	0.333333333	0.333333333	0.666666667	0.225888768	0.598049731	0.101466842	0.497543925	0.200605334	0.777674087	0.954847416	0.263297885	0.123939236	0.300551192	0.41613176	0.225433885	0.527757504	0.128885319	1
0.134043219	0.097392248	0.196493293	0.018647646	0.61382236	0.218195193	0.372551795	0.318239198	0.179318112	0.229943445	0.216249136	0.25578204	0.146180383	0.197618539	0.333333333	0.25	0.5	0	0.333333333	0.5	1	0.5	0.333333333	0.5	0.5	0.333333333	0.333333333	1	0.165512528	0.150466749	0.047022125	0.522840495	0.085677346	0.220284497	0.864574421	0.167391746	0.190068278	0.080350819	0.256815345	0.1938945	0.590477482	0.153472536	1
0.212395256	0.007525441	0.164825731	0.027533395	0.346973305	0.108339726	0.281123431	0.160164688	0.158190659	0.248048925	0.314908895	0.172093188	0.176253798	0.069094885	0.333333333	0.25	0.25	0.333333333	0.333333333	0.25	1	0.25	0.333333333	0.5	0.5	0.333333333	0.333333333	0.666666667	0.075426591	0.601027597	0.161539915	0.562719908	0.183059258	0.8787211	0.632740459	0.259719361	0.198061668	0.072191622	0.474347427	0.446600976	0.643557064	0.171375352	1
0.333578314	0.381380069	0.51616468	0.032299612	0.474668104	0.108278236	0.084144598	0.239661804	0.133284549	0.136613662	0.275300892	0.201034038	0.358474875	0.150178691	1	0.75	0.5	0.666666667	0.666666667	0.25	0.333333333	0.25	0.333333333	0.25	0.75	0.333333333	0.666666667	0.666666667	0.109577429	0.047222411	0.045029808	0.253247531	0.021898206	0.230806937	0.980209309	0.18788895	0.143620382	0.418264818	0.097689516	0.236200423	0.353984553	0.147625492	0
0.254497057	0.191184628	0.511721141	0.942666952	0.447395981	0.128680022	0.041907809	0.052750556	0.12246949	0.310436589	0.131474197	0.193627315	0.110004519	0.028445311	0.333333333	0.25	0.75	1	0.333333333	0.25	0.333333333	0.25	0.666666667	0.25	0.75	0	0.333333333	0.333333333	0.179430082	0.186429257	0.016992327	0.193406205	0.047161426	0.692679123	0.878577774	0.32723266	0.075570864	0.240061287	0.006239665	0.092241409	0.284412556	0.228815772	1
0.147559728	0.16485773	0.264624924	0.062940424	0.277003159	0.070174637	0.066062312	0.098610934	0.104643417	0.222878623	0.071376659	0.14919978	0.320516744	0.234545813	0.333333333	0.5	0.5	0.666666667	0.666666667	0.25	0.333333333	0.25	0.666666667	0.75	0.25	0.666666667	0.333333333	0	0.122496404	0.277714742	0.360482549	0.38890405	0.06159511	0.642565675	0.951696753	0.20181894	0.033206128	0.19292899	0.805995091	0.105113145	0.26966386	0.223611045	0
0.342317434	0.045141154	0.147972841	0.009006566	0.002038785	0.117917527	0.016634348	0.224716715	0.200314125	0.107409615	0.095701061	0.221743259	0.007499399	0.247582549	0.333333333	0.25	0.25	0	0	0.25	0.333333333	0.25	1	0.25	0.75	0.333333333	1	1	0.179445463	0.371153709	0.045400698	0.958377132	0.424166057	0.940237778	0.953419425	0.155100963	0.045326297	0.223510769	0.129918607	0.120591602	0.734532084	0.062114563	1
0.205817926	0.007098754	0.397222371	0.023513822	0.364430837	0.043976441	0.099563626	0.248632683	0.080145188	0.271177961	0.157193559	0.101192611	0.247908126	0.454922076	0.333333333	0.25	0.5	0.333333333	0.333333333	0.25	0.666666667	0.25	0	0.5	0.25	0	0.333333333	1	0.193064404	0.234897151	0.031157671	0.329762169	0.129759686	0.457061672	0.928242934	0.418399214	0.161651744	0.163355893	0.237436987	0.323695503	0.315248117	0.061049604	1
0.196165197	0.076123953	0.362198625	0.026211989	0.37741891	0.253925105	0.622018704	0.485113661	0.209041562	0.265773224	0.231887997	0.253012773	0.304469593	0.143338309	0.333333333	0.25	0.5	0.333333333	0	0.5	0.666666667	0.5	0.333333333	0.5	0.5	0.333333333	0.333333333	0.666666667	0.210547229	0.460496783	0.074738282	0.522929885	0.136857055	0.41431273	0.396312124	0.118380804	0.094884007	0.146970192	0.089366338	0.129590921	0.424084114	0.062736732	1
0.177449921	0.154215121	0.449704997	0.01736888	0.364874063	0.147412814	0.329415706	0.2781459	0.178677267	0.359117737	0.232295903	0.263085501	0.17943314	0.06896654	0.333333333	0.25	0.75	0.333333333	0.333333333	0.25	1	0.25	0.666666667	0.5	0.5	0.333333333	0.333333333	0.333333333	0.237990649	0.291781356	0.04726329	0.33506587	0.077484613	0.703595703	0.940738229	0.225449258	0.102580309	0.088197378	0.482224946	0.167198356	0.599119034	0.163099516	1
0.183680175	0.088441149	0.460387098	0.0211123	0.707362782	0.268478408	0.275132226	0.382405652	0.100173512	0.284846099	0.317419297	0.223208142	0.309463528	0.102324759	0.333333333	0.25	0.5	0.333333333	0.333333333	0.5	0.666666667	0.5	0.333333333	0.5	0.25	0	0.333333333	0.666666667	0.309334547	0.147697589	0.012321756	0.094843496	0.011517353	0.098586103	0.635615997	0.252924744	0.102250012	0.266934455	0.119975095	0.261477918	0.088247003	0.225749954	1
0.081954314	0.132670148	0.175637002	0.024354464	0.218466574	0.054810547	0.048032434	0.046284138	0.019032666	0.252868514	0.008828551	0.031433865	0.470147518	0.139072657	0.333333333	0.25	0.5	0.333333333	0	0.25	0.333333333	0.25	0.333333333	0.5	0.5	0	0.333333333	0.333333333	0.101455162	0.483072572	0.166706131	0.734189266	0.155713001	0.732889004	0.981710983	1	1	0.131355792	1	0.690661481	0.310555873	0.466457204	1
0.199513492	0.148744484	0.107186619	0.012892741	0.018998804	0.15207601	0.033936498	0.134277415	0.345228615	0.096722893	0.14301759	0.207438388	0.001500234	0.134075365	0.333333333	0.25	0.25	0	0	0.25	0	0.25	1	0.25	0.5	0	0.333333333	0.333333333	0.221265708	0.319267378	0.065082359	0.870186453	0.697548734	0.976382454	0.937247332	0.261853588	0.054276241	0.245521203	0.42982139	0.135959035	0.668619886	0.108047092	1
0.229150369	0.112077295	0.196313958	0.033453497	0.242770428	0.087096251	0.227594553	0.124289985	0.105881045	0.224265015	0.134684476	0.141868696	0.165958964	0.139894216	1	0.75	0.5	0.666666667	0.333333333	0.25	1	0.25	0.666666667	0.5	0.5	0.333333333	0.333333333	0.333333333	0.126898476	0.358210264	0.019748581	0.404648356	0.16065737	0.802721772	0.444237879	0.296006818	0.115279063	0.189945575	0.473963379	0.172557825	0.666142536	0.131087383	1
0.084117238	0.097532759	0.348595045	0.020421662	0.494824487	0.520291152	0.13431939	0.310063327	0.082176546	0.229710223	0.058909456	0.156645959	0.493136324	0.087252032	0.333333333	0.25	0.5	0.333333333	0.333333333	0.5	1	0.5	0.333333333	0.5	0.25	0	0.333333333	0	0.306667957	0.189489186	0.010299151	0.302423899	0.019279157	0.119780487	0.352297955	0.24036014	0.108790207	0.337697861	0.101106059	0.18050067	0.169269716	0.143402664	1
0.37526633	0.290303057	0.300829781	0.006122575	0.719194106	0.178606013	0.228401351	0.211351595	0.138325796	0.385091363	0.203262734	0.253257892	0.191654635	0.089381169	1	0.75	0.5	0.333333333	0.333333333	0.25	0.666666667	0.25	0.333333333	0.5	0.5	0.333333333	0.333333333	0.666666667	0.036499694	0.083037213	0.056876454	0.162368677	0.009274746	0.442842493	0.932979791	0.228420117	0.156459384	0.14617104	0.202829348	0.151356332	0.367427077	0.087319599	0
0.158040862	0.014556007	0.216020583	0.037605282	0.717266617	0.497829282	0.149976375	0.579144775	0.144948642	0.438395411	0.202035551	0.220457218	0.308456104	0.231794013	0.333333333	0.25	0.5	0.333333333	0.333333333	0.5	0.666666667	0.5	0.333333333	0.5	0.5	0.333333333	0.333333333	0.333333333	0.219091097	0.290099505	0.381371266	0.367207782	0.114334489	0.423716543	0.981053112	0.13121313	0.100289366	0.246321741	0.061236829	0.108414422	0.276439431	0.13806111	1
0.230564567	0.374938472	0.273944187	0.050226258	0.604299228	0.080052898	0.162346037	0.238571054	0.16276643	0.363039384	0.236801606	0.49685178	0.286658115	0.033204512	0.666666667	0.5	0.25	0.666666667	0.666666667	0.25	0.666666667	0.25	0.333333333	0.5	0.5	1	0.666666667	0.666666667	0.060819684	0.160015255	0.134854919	0.389270103	0.036670214	0.527631249	0.947186816	0.315454059	0.25665306	0.13498973	0.282316616	0.12586339	0.466887374	0.175790079	1
0.155939121	0.231089544	0.242056148	0.025087734	0.392440195	0.215981264	0.529066086	0.492048527	0.168248804	0.300142946	0.282970488	0.21515923	0.193594052	0.145192465	0.333333333	0.25	0.5	0.666666667	0	0.75	1	0.75	0.666666667	0.25	0.25	0	0	1	0.130619114	0.241707407	0.35280568	0.459996686	0.108471009	0.246892719	0.312456835	0.16384118	0.151440871	0.131503015	0.193348995	0.361296182	0.33525222	0.142794373	1
0.280087294	0.03359461	0.396923987	0.001415787	0.010734382	0.098487455	0.019605821	0.232761856	0.051737366	0.109787966	0.176241788	0.091164961	0.001424977	0.783983917	0.333333333	0.25	0.75	0	0	0.75	0.333333333	0.75	0.666666667	0.25	0.75	0	0	1	0.164268157	0.166997016	0.004850831	0.955196572	0.86711057	0.982462762	0.950374818	0.212959519	0.083608842	0.209588033	0.387527553	0.176054832	0.9851896	0.078074719	1
0.276358779	0.082078687	0.31521435	0.038217983	0.015335175	0.098805841	0.121928791	0.240580991	0.167025934	0.20041138	0.21455895	0.277376194	0.016135812	0.136728947	0.666666667	0.5	0.5	0.333333333	0.333333333	0.5	0.666666667	0.5	0.333333333	0.5	0.5	0.333333333	0.333333333	0.666666667	0.002636215	0.519138227	0.039089722	0.795502761	0.295720381	0.96681991	0.913526681	0.119121689	0.052164119	0.22049605	0.709998133	0.055707878	0.895696611	0.077654161	1
0.189076179	0.006916093	0.135733084	0.022502959	0.268492161	0.059325589	0.081364733	0.140952043	0.113026936	0.159699356	0.052505999	0.218513564	0.152006452	0.02305576	0.333333333	0.25	0.5	0.333333333	0	0.25	0.333333333	0.25	0.333333333	0.75	0.5	0.333333333	0.666666667	0.333333333	0.114667376	0.533724651	0.537434362	0.621260889	0.129656827	0.889886235	0.753720032	0.095753745	0.055832401	0.088224734	0.899840958	0.094703561	0.480079772	0.181830732	1
0.543969831	0.126145906	0.127017656	0.01471874	0.004453165	0.163790531	0.037507359	0.196574672	0.19874041	0.146379464	0.237875619	0.253452422	0.005162357	0.040021992	0.666666667	0.5	0.25	0	0	0.5	0.333333333	0.25	0.333333333	0.25	0.5	0.333333333	0.333333333	0.333333333	0.140423529	0.116982498	0.047532588	0.927104623	0.637218699	0.85523962	0.962883099	0.205891936	0.094846637	0.222395574	0.454802532	0.076450083	0.934063776	0.134245416	0
0.271382502	0.355450267	0.343814456	0.017918955	0.402201499	0.460670831	0.158113466	0.271113175	0.115688084	0.247998319	0.210325856	0.146341543	0.308181449	0.123641795	1	0.75	0.25	0.666666667	0.333333333	0.25	1	0.25	0.666666667	0.25	0.75	0	0	1	0.097660323	0.131509677	0.015418492	0.358319124	0.06047835	0.348487335	0.934422942	0.185272694	0.090113128	0.188415713	0.033019313	0.149378523	0.303217234	0.079082198	1
0.359033386	0.232743984	0.190436965	0.016863522	0.004449792	0.07073609	0.021955499	0.13844888	0.33448884	0.334477819	0.41253885	0.174172177	0.001677368	0.046012995	0.666666667	0.5	0.5	0	0.333333333	0.25	0.333333333	0.25	1	0.5	0.75	0.333333333	0	0.333333333	0.154949537	0.143855008	0.077051157	0.909300991	0.742307584	0.847819573	0.951250268	0.309015469	0.068798274	0.12507255	0.101959762	0.170186853	0.919368123	0.134388397	1
0.070066527	0.090698261	0.213226739	0.025221764	0.470118342	0.206249136	0.109980749	0.329526885	0.118401872	0.193327738	0.293340908	0.191460835	0.235867934	0.099603392	0.333333333	0.25	0.5	0.333333333	0.333333333	0.5	0.666666667	0.5	0.333333333	0.5	0.5	0.333333333	0.333333333	0.333333333	0.30650919	0.313911225	0.056681951	0.305993557	0.062546977	0.170813998	0.268972599	0.172141376	0.07499565	0.170628197	0.053978383	0.073071084	0.53402487	0.171590482	1
0.1035642	0.034649269	0.307427112	0.018612961	0.165503175	0.071860999	0.083841257	0.038293403	0.016034978	0.178949335	0.214509099	0.02335866	0.153959944	0.121596121	0.333333333	0.25	0.5	0	0.333333333	0.25	0.666666667	0.25	0.333333333	0.5	0.5	0.333333333	0.333333333	0.666666667	0.130648879	0.594759667	0.252952964	0.680790139	0.245692569	0.892312151	0.943490043	0.288068281	0.149080143	0.206133617	0.491945349	0.082941743	0.73380091	0.111068413	1
0.183450139	0.005252848	0.39264841	0.078414165	0.651717454	0.096944871	0.552512156	0.181691036	0.181663313	0.311117776	0.203854907	0.25216369	0.228988105	0.116904857	0.333333333	0.25	0.5	1	0.333333333	0.25	0.666666667	0.25	0.333333333	0.5	0.5	0.333333333	0.333333333	0.666666667	0.146179164	0.468750879	0.032269673	0.429743973	0.146352981	0.721311068	0.554618833	0.131192635	0.122928419	0.065863186	0.293417573	0.181277708	0.434608824	0.130602076	1
0.081917076	0.068257956	0.493330061	0.057350657	0.571638737	0.103429088	0.146556081	0.11004618	0.044579461	0.269024872	0.468583399	0.230972375	0.589901665	0.212257354	0.333333333	0.25	0.5	0.666666667	0.666666667	0.25	0.666666667	0.25	0.333333333	0.5	0.5	0.333333333	0.333333333	0.333333333	0.183567882	0.323745269	0.068125735	0.349722249	0.091487152	0.550752879	0.942899374	0.250090196	0.066713564	0.285644498	0.067161391	0.044942005	0.307151786	0.088611693	0
0.540795863	0.102005109	0.182477964	0.011228555	0.003175728	0.065220694	0.043371171	0.173107243	0.183076124	0.198944443	0.139986121	0.428344133	0.011952624	0.06318381	1	0.25	0.75	0	0	0.25	0.333333333	0.25	0.666666667	0.25	0.75	0.666666667	0.333333333	0.666666667	0.061682152	0.483125481	0.008830846	0.890095136	0.510052428	0.924575899	0.92138465	0.281348652	0.078100312	1	0.093552557	0	0.956000246	0.083403232	0
0.138758018	0.015525209	0.388082063	0.043724412	0.286858564	0.120219752	0.102104112	0.132495341	0.082184698	0.172550437	0.192396258	0.119195443	0.17375767	0.05906172	0.333333333	0.25	0.5	0.333333333	0.333333333	0.25	0.666666667	0.25	0.333333333	0.5	0.5	0.333333333	0.333333333	0.333333333	0.201273537	0.380200923	0.316929044	0.317423717	0.121237741	0.711228976	0.928817118	0.50071063	0.107491298	0.301849446	0.222350201	0.247307657	0.47487101	0.220026906	1
0.226580887	0.303958117	0.13137183	0.207788195	0.394799058	0.097855298	0.12178033	0.199545456	0.185256611	0.316320434	0.220333697	0.166465187	0.160392959	0.242277076	0.666666667	0.5	0.25	1	0.333333333	0.25	0.666666667	0.25	1	0.5	0.5	0.333333333	0.333333333	0.333333333	0.171898902	0.304764739	0.108950291	0.056407913	0.128682547	0.713368199	0.48339395	0.151582238	0.107054725	0.177037022	0.247363299	0.150274622	0.416168866	0.140701321	0
0.185098837	0.242110646	0.286903564	0.000684387	0.470905666	0.127474992	0.058324312	0.420782234	0.143001945	0.260305135	0.030647179	0.24441344	0.432193423	0.037387316	0.666666667	0.5	0.5	0.333333333	0.333333333	0.5	1	0.5	0.333333333	0.5	0.5	0.333333333	0.333333333	0.333333333	0.047021651	0.140972137	0.451441459	0.12524116	0.03005472	0.242022191	0.935172876	0.129939649	0.082282947	0.158154684	0.793586861	0.092162677	0.125256216	0.111076823	1
0.130039933	0.409920862	0.217273182	0.030452145	0.322224958	0.281362829	0.084930197	0.251565102	0.063707896	0.20407758	0.162711353	0.114645459	0.414638649	0.058804877	0.333333333	0.75	0.5	0.333333333	0.333333333	0.5	0.666666667	0.5	0.333333333	0.5	0.75	0	0.333333333	0.333333333	0.403765967	0.12792702	0.223672914	0.512275843	0.064831964	0.712579381	0.927774179	0.2474214	0.120479637	0.176855384	0.634790303	0.227592603	0.236550672	0.214936149	1
0.223558583	0.065173815	0.301625084	0.031557802	0.005238812	0.075467431	0.049787288	0.069899151	0.091948873	0.16101088	0.180028816	0.058995382	0.077978818	0.231963397	0.333333333	0.25	0.75	0.333333333	0	0.25	0.333333333	0.25	1	0.5	0.75	0.333333333	0.666666667	0.333333333	0.048025667	0.338172109	0.008559316	0.894693609	0.476816074	0.95442488	0.950003084	0.207755595	0.092623551	0.240985166	0.187448829	0.091656793	0.775428019	0.105950062	0
0.068377016	0.360974966	0.53954199	0.059726675	0.475069763	0.111334003	0.059243405	0.170812722	0.128032769	0.186306655	0.029020875	0.137222449	0.39481465	0.437590177	0.333333333	0.25	0.5	0.666666667	0.333333333	0.25	0.666666667	0.25	0	0.25	0.5	0	0	1	0.245742944	0.067090928	0.071675715	0.667987502	0.020856856	0.434918465	0.949427404	0.186867921	0.156538743	0.244573749	0.926248399	0.290820918	0.380339662	0	1
0.169988205	0.030646546	0.278534392	0.023479057	0.193593041	0.181628653	0.219177655	0.31681896	0.156561294	0.189797762	0.235468344	0.179981215	0.161287169	0.0667232	0.333333333	0.25	0.5	0.333333333	0	0.5	1	0.5	0.333333333	0	0.5	0.333333333	0	1	0.110947358	0.428953982	0.309311167	0.620375944	0.190972742	0.64569103	0.96283523	0.023149795	0.065997771	0.161311215	0.320918305	0.142706219	0.541341679	0.071410221	1
0.414642225	0.119833673	0.69383109	0.018447745	1	0.217065854	0.271904072	0.219142503	0.239944007	0.642245651	0.147712491	0.174492145	0.333366839	0.174814089	0.333333333	0.25	0.75	0.666666667	0.666666667	0.25	1	0.25	0.333333333	0.75	0.5	0	0.666666667	1	0.116562294	0.148030822	0.041059656	0.467922903	0.055428762	0.447322646	0.932720415	0.289112632	0.127723224	0.224371093	0.753707568	0.280361139	0.326503118	0.063226041	1
0.172218231	0.162325308	0.536511131	0.014553971	0.795415603	0.49066154	0.032284989	0.346992552	0.077254459	0.217948084	0.455176835	0.174554713	0.740709407	0.249697852	0.666666667	0.5	0.5	0.333333333	0.333333333	0.5	0.666666667	0.5	0.333333333	0.5	0.5	0.333333333	0.333333333	0.666666667	0.254604951	0.154886962	0.047376114	0.767633798	0.017459467	0.274307756	0.967935499	0.358545181	0.190806845	0.578520451	0.123665408	0.337228156	0.168177087	0.174413064	1
0.160265439	0.1427806	0.330559834	0.025739507	0.338957556	0.223043063	0.449380887	0.431929919	0.145383562	0.233912538	0.350139984	0.239806724	0.228190961	0.042940256	0.333333333	0.25	0.5	0.333333333	0.333333333	0.5	0.666666667	0.5	0.333333333	0.5	0.5	0.333333333	0.333333333	0.333333333	0.267045882	0.466709205	0.154233083	0.492035878	0.141106617	0.543484676	0.590676639	0.108688812	0.144743492	0.184315892	0.179399583	0.138725917	0.415090726	0.154215143	1
0.170354048	0.13138127	0.005539563	0.013390049	0.622022545	0.331001281	0.204357648	0.362412436	0.114655129	0.245536073	0.208522358	0.282635147	0.940896744	0.247256385	0.333333333	0.25	0.5	0.333333333	0.333333333	0.5	0.666666667	0.5	0.333333333	0.5	0.5	0.333333333	0.333333333	0.333333333	0.330587064	0.105779801	0.760516764	0.422620303	0.006492643	0	0.947684629	0.107318425	0.115724454	0.152657414	0.290960614	0.073530579	0.059115394	0.142118319	1
0.124301711	0.151621486	0.255288166	0.019292954	0.460377837	0.104523836	0.042310428	0.161337091	0.074696646	0.143009332	0.08489113	0.27003068	0.16877624	0.097191436	0.333333333	0.25	0.5	0	0.666666667	0.25	0.333333333	0.25	0.333333333	0.5	0.5	0.666666667	0	0.333333333	0.303898334	0.418192554	0.105771014	0.615137902	0.12518867	0.706397634	0.853774907	0.564781391	0.207864777	0.56976178	0.443842044	0.396632956	0.605983174	0.343791745	1
0.187381958	0.066669025	0.307964398	0.044117888	0.517741733	0.237264595	0.271690179	0.453953361	0.148061973	0.353017998	0.635526611	0.280497803	0.387595013	0.231231756	0.333333333	0.25	0.5	0.333333333	0.333333333	0.5	0.666666667	0.5	0.333333333	0.5	0.5	0.333333333	0.333333333	0.666666667	0.315163535	0.387867554	0.063326988	0.394339062	0.145334339	0.43568364	0.974726481	0.106026766	0.156090339	0.136846135	0.162426145	0.212131723	0.347792844	0.115367018	1
0.128229091	0.141295833	0.402551155	0.030222283	0.431985714	0.161546774	0.19197488	0.279033897	0.11178779	0.12486081	0.198089319	0.101853614	0.37047687	0.183958833	0.666666667	0.5	0.5	0.333333333	0.333333333	0.5	1	0.5	0.333333333	0.5	0.5	0.333333333	0.333333333	1	0.207529198	0.348067118	0.10149008	0.477012023	0.150100598	0.492971573	0.887293711	0.337192232	0.215108309	0.587813057	0.17494933	0.15714105	0.394187268	0.135461626	1
0.317677698	0.168281283	0.156514845	0.024858447	0	0.245663319	0.033530294	0.197784575	0.229483176	0.206332632	0.142736073	0.30905233	0.005478397	0.155510602	0.666666667	0.5	0.5	0.666666667	0	0.5	0	0.5	0.666666667	0.5	0.75	0.666666667	0.666666667	0.333333333	0.085065289	0.102638957	0.56250922	0.885967705	0.815881919	0.853033793	0.714971349	0.172908795	0.038050437	0.365305784	0.608237096	0.014679476	0.946056427	0.111991087	1
0.187512488	0.16719454	0.19916537	0.013173852	0.064259768	0.191849585	0.296391842	0.421170033	0.232448762	0.456580396	0.32187363	0.223851263	0.065057851	0.323062846	0.666666667	0.5	0.5	0.333333333	0.333333333	0.5	0.666666667	0.5	0.333333333	0.5	0.5	0.333333333	0.333333333	0.666666667	0.156222932	0.20392283	0.301036375	0.815688709	0.335486329	0.695200166	0.764655184	0.1283259	0.092334645	0.269088563	0.178442422	0.124002665	0.572587849	0.069844298	0
0.252840862	0.091442582	0.191596047	0.029027927	0.307068229	0.167969631	0.203295557	0.289800308	0.195013301	0.455523991	0.647069372	0.267226033	0.095753456	0.36744425	0	0	0.5	0.333333333	0.666666667	0.5	0.666666667	0.5	0.333333333	0.5	0.5	0.333333333	0.333333333	0.666666667	0.135127834	0.368207142	0.359974133	0.593329023	0.163222425	0.748480036	0.761432473	0.170886214	0.075116853	0.339192673	0.150334994	0.128625695	0.593123039	0.066595504	1
0.13817918	0.273226087	0.287056916	0.027133998	0.617077997	0.052839055	0.347308719	0.346516269	0.134576335	0.320409982	0.232051291	0.164453606	0.276614321	0.135236307	0.333333333	0.25	0.5	0.333333333	0.333333333	0.25	0.666666667	0.25	0.333333333	0.5	0.5	0	0.333333333	0.333333333	0.244407861	0.369742293	0.010380895	0.217587912	0.094712473	0.435931388	0.518977986	0.221354405	0.082366896	0.304796997	0.098530007	0.05831949	0.360966767	0.114021692	1
0.179739207	0.218172431	0.211518673	0.041312595	0.328260667	0.084607981	0.087735416	0.173348934	0.202416425	0.124255448	0.176779442	0.163445544	0.264753276	0.365659415	0.333333333	0.25	0.25	0.666666667	0.666666667	0.25	1	0.25	0.666666667	0.75	0.75	0	0.666666667	1	0.196232113	0.092976633	0.157069027	0.369978436	0.340370025	0.55531618	0.96438467	0.278700941	0.052456085	0.185321629	0.222951124	0.375776552	0.446479679	0.208321778	1
0.341864909	0.114898407	0.143225301	0.02204735	0.005847122	0.07635159	0.091769641	0.207875042	0.112466783	0.21168065	0.259951694	0.189187323	0.009167475	0.0933142	0.666666667	0.5	0.25	0	0.666666667	0.25	1	0.25	0.333333333	0.25	0.5	0	0	1	0.256578805	0.349724691	0.150840103	0.81740574	0.366467417	0.720542155	0.909542401	0.324385262	0.207811776	0.475037033	0.179590357	0.512109335	0.872623631	0.157286672	1
0.171106177	0.073521723	0.077924222	0.011984167	0.001381906	0.081737055	0.021143565	0.094304454	0.10460479	0.026817982	0.065738598	0.018575555	0.028675318	0.195396718	0.666666667	0.5	0.5	0.333333333	0.333333333	0.5	0.666666667	0.5	0.666666667	0	0.5	0.333333333	0.666666667	1	0.0631453	0.514963564	0.011492963	0.92563352	0.406025419	0.955280442	0.965533782	0.118116072	0.081678553	0.15806704	0.256112539	0.080746832	0.977558997	0.093740443	1
0.291185911	0.370822469	0.23641306	0.017374793	0.522879657	0.126473174	0.079502206	0.259548231	0.173341998	0.16960331	0.227346475	0.214390877	0.395665271	0.081169882	0.666666667	0.5	0.5	0	0.333333333	0.25	0.333333333	0.25	0.333333333	0.25	0.5	0.333333333	0.333333333	0.333333333	0.00722269	0.23514394	0.086876286	0.631402128	0.097882569	0.59498798	0.940200438	0.211919255	0.069378421	0.291083276	0.151745219	0.072711401	0.306804013	0.174332855	1
0.146944071	0.012583099	0.759266645	0.042659784	0.482004185	0.165655172	0.129229884	0.064530389	0.036303993	0.18520781	0.188578361	0.092443164	0.487788219	0.293589088	0.333333333	0.25	0.5	0.333333333	0.333333333	0.25	0.666666667	0.25	0.333333333	0.5	0.5	0.333333333	0.333333333	0.666666667	0.191738043	0.218178106	0.069264467	0.334590879	0.095742507	0.470932308	0.844187573	0.373825977	0.124017506	0.145443909	0.192631307	0.176754498	0.231524341	0.19254013	1
0.123182851	0.202148866	0.134020627	0.570490291	0.375542143	0	0.373986593	0.130215741	0.088552629	0.267872439	0.124975154	0.166292218	0.279382633	0.117937762	0.333333333	0.25	0.5	1	0.666666667	0	0.666666667	0.25	1	0.5	0.75	0.333333333	0.666666667	0	0.118257331	0.178393291	0.892659049	0.176706946	0.038807927	0.861197532	0.289261912	0.194318838	0.111332675	0.257761722	0.826963944	0.087469581	0.388288845	0.291246846	1
0.248893902	0.299387178	0.239456925	0.036003142	0.392645744	0.084604552	0.056837522	0.135697372	0.100564717	0.165360114	0.161728369	0.076329503	0.298621418	0.19169609	0.666666667	0.5	0.25	0.666666667	0.666666667	0.25	0.666666667	0.25	0.333333333	0.5	0.75	0	0.666666667	0.333333333	0.026809551	0.057045873	0.037230666	0.319503301	0.016712314	0.212757565	0.585569317	0.342830362	0.107479944	0.282825817	0.645929927	0.123120403	0.543749085	0.101816378	1
0.273564218	0.635872995	0.004001556	0.021297059	0.681783139	0.255355369	0.032483212	0.465084306	0.22260941	0.346356487	0.119261337	0.199283811	0.559965777	0.217970302	0.666666667	0.5	0.5	0.333333333	0.333333333	0.5	0.666666667	0.5	0.333333333	0.5	0.5	0.333333333	0.333333333	0.666666667	0.1062433	0.017309096	0.879393706	0.507373263	0	0.055958014	0.950897573	0.091074405	0.04645601	0.139661161	0.059849231	0.022060923	0	0.045510192	0
0.275761519	0.028122126	0.415435524	0.015763813	0.438807012	0.179430147	0.34196245	0.291144871	0.191105574	0.505456758	0.546560939	0.265547792	0.16940013	0.145233198	0.333333333	0.25	0.5	0.333333333	0.333333333	0.25	0.666666667	0.25	0.333333333	0.5	0.5	0.333333333	0.333333333	0.666666667	0.185083313	0.366332374	0.212487684	0.5067766	0.122421597	0.800297701	0.693290941	0.248571807	0.137515055	0.163137152	0.177818589	0.110217256	0.424089132	0.083347626	0
0.37283485	0.114571211	0.389204944	0.016861886	0.011280523	0.140052409	0.107605913	0.202034946	0.20366311	0.146341237	0.231641459	0.346058482	0.008371617	0.134208321	0.666666667	0.5	1	0	0	0.75	1	0.25	0.666666667	0.25	0.25	1	0	0.333333333	0.196238301	0.250314751	0.067247687	0.93676112	0.472664212	0.951463565	0.881572612	0.235921134	0.110936884	0.1347962	0.465757661	0.105096967	0.945199298	0.160210451	1
0.339436609	0.455901125	0.310797512	0.01850414	0.41507077	0.153680343	0.182361255	0.336332701	0.141507031	0.210258971	0.182014983	0.193128676	0.324646476	0.172813296	0.666666667	0.5	0.5	0	0.666666667	0.25	1	0.25	0.333333333	0.25	0.75	0	0	1	0.180217953	0.209727885	0.04759561	0.381888944	0.05105111	0.340956234	0.952042963	0.220756764	0.19891349	0.249350119	0.305364583	0.414601195	0.263312601	0.183234014	0
0.19809557	0.110303921	0.337377121	0.026651301	0.612859405	0.220473727	0.278093794	0.080090797	0.194403038	0.389505509	0.961696605	0.268211523	0.289242685	0.336609732	0.333333333	0.25	0.25	0.666666667	0.666666667	0.75	0.333333333	0.75	0.666666667	0.75	0.75	0	0.666666667	0.333333333	0.239286051	0.111420069	0.060716552	0.268297533	0.024548163	0.013992915	0.971258607	0.187791434	0.100564654	0.117619291	0.051766298	0.243700593	0.301829684	0.138326867	0
0.240876603	0.292930194	0.423490068	0.029735832	0.465177282	0.269091675	0.261784858	0.347128382	0.223543185	0.281284118	0.349866844	0.201154555	0.244054496	0.093841873	0.333333333	0.25	0.5	0.666666667	0.333333333	0.25	0.666666667	0.25	0.333333333	0.25	0.5	0.333333333	0.333333333	0.333333333	0.410387579	0.334846434	0.181855237	0.397298542	0.180062889	0.517505717	0.878967313	0.318409466	0.188308928	0.203233203	0.256378664	0.50840461	0.392000947	0.211415852	0
0.287252711	0.374703087	0.184972283	0.028272068	0.604396975	0.454032676	0.536376758	0.576354242	0.268595315	0.416862341	0.358816399	0.284479339	0.297307674	0.094144059	0.666666667	0.5	0	0.333333333	0.666666667	0.5	0.666666667	0.5	0.666666667	0.5	0.5	0.333333333	0.333333333	0.666666667	0.207318105	0.15218872	0.358748016	0.301148614	0.067881252	0.249542106	0.934189841	0.17474106	0.177919993	0.142069966	0.078322263	0.278881685	0.254575855	0.18082936	0
0.217291189	0.158740381	0.160921422	0.497714866	0.409637909	0.076191313	0.154341491	0.183573208	0.088685481	0.237728352	0.198448189	0.185074439	0.18955073	0.260096223	0.333333333	0.25	0.25	1	0	0.25	0.333333333	0.25	0	0.25	0.25	0.333333333	0	0.666666667	0.293861887	0.389840436	0.126281728	0.044882952	0.101288922	0.539034461	0.696673635	0.482330756	0.165433914	0.752100815	0.185732353	0.240990305	0.369632606	0.126334088	1
0.237862461	0.453884329	0.30894416	0.147973787	0.2788704	0.105316956	0.082762492	0.216180242	0.0252853	0.242401036	0.037568599	0.134071846	0.206945788	0.018630562	0.666666667	0.5	0.75	1	0.333333333	0.25	1	0.25	0	0.5	0.75	0.333333333	0.666666667	0.333333333	0.471547223	0.157549255	0.209251198	0.190155061	0.09362036	0.435216411	0.596755041	0.40593977	0.40394912	0.695780879	0.746933612	0.696010496	0.407324145	0.409287508	1
0.210270753	0.061761942	0.159793221	0.012789985	0.008708855	0.089336152	0.061565058	0.150717665	0.132198314	0.15683347	0.400925185	0.201517912	0.008034088	0.234415009	0.333333333	0.25	0.75	0	0	0.25	0.333333333	0.25	0.666666667	0.25	1	0.666666667	0	0.333333333	0.348688757	0.363501743	0.70869817	0.926237856	0.477439447	0.757790578	0.887015047	0.455045544	0.321867203	0.391046907	0.353294669	0.627011233	0.900459424	0.187001734	1
0.282317099	0.210875255	0.228019735	0.020104483	0.001893113	0.076656518	0.03443588	0.204285059	0.131308921	0.024725345	0.127140809	0.177132781	0.016979757	0.104845538	1	0.75	1	0	0	0.25	0.333333333	0.25	0.666666667	0	0.25	0.333333333	1	1	0.090610773	0.344117236	0.052767765	0.796073504	0.542739012	0.873902975	0.798383023	0.322959488	0.151019153	0.574746692	0.261936952	0.645743908	0.91166675	0.151199278	1
0.264991163	0.029313704	0.523744235	0.055985225	0.445437331	0.111669018	0.085405965	0.091113006	0.050295518	0.123635451	0.437917804	0.14498368	0.337692943	0.140108022	0.333333333	0.25	0.75	0.666666667	0	0.25	0.333333333	0.25	0.333333333	0.25	0.75	0.333333333	0	0.666666667	0.307441333	0.167347986	0.069168449	0.265333466	0.125942695	0.450895661	0.676960537	0.634636352	0.378726712	0.393039457	0.330415394	0.604320091	0.369261679	0.220989878	1
0.142189987	0.018947335	0.226310599	0.047363886	0.37336853	0.11808357	0.050125773	0.137288828	0.073593682	0.12929952	0.189271847	0.161710796	0.235332917	0.082827756	0.333333333	0.25	0.5	0.666666667	0.666666667	0.25	0.333333333	0.25	0.333333333	0	0.5	0.333333333	0.666666667	0.333333333	0.395319478	0.505774176	0.432069894	0.59732399	0.133014388	0.652638207	0.893878159	0.593612197	0.312533071	0.57172318	0.532258872	0.668202811	0.548951556	0.370379159	0
0.244784278	0.080158658	0.598239954	0.046516448	0.595310743	0.115291985	0.126505097	0.525641391	0.177279215	0.252946843	0.090772436	0.334866049	0.300425578	0.042472067	0.333333333	0.25	0.75	1	0	0.25	0.666666667	0.75	0.666666667	0.25	0.75	0.666666667	1	0.333333333	0.24199683	0.156242731	0.005611659	0.3733829	0.053499827	0.330787305	0.970203101	0.058816839	0.109864911	0.206440713	0.267997247	0.109383986	0.492531235	0.107815652	1
0.331415981	0.236363241	0.954630963	0.024719428	0.464526672	0.103332376	0.038426999	0.043536765	0.023526892	0.112025129	0.042811582	0.092402274	0.407646709	0.127854264	0.666666667	0.5	0.75	0.666666667	0.666666667	0.25	0.666666667	0.25	0.333333333	0.25	0.25	0.333333333	0.333333333	0.333333333	0.541102276	0.071728952	0.030015392	0.131560397	0.011268042	0.248127905	0.943217112	0.295791433	0.211386861	0.411495647	0.563355093	0.493378168	0.107931077	0.145378699	1
0.258413093	0.104008904	0.16433623	0.01545327	0.000707392	0.074522561	0.032524293	0.063590989	0.101674447	0.067796614	0.286735253	0.05486895	0.000407636	0.461268447	0.666666667	0.5	0.75	0.666666667	0	0.75	0.333333333	0.75	1	0.25	0	0.666666667	0.666666667	0.333333333	0.170504487	0.039441388	0.020530629	0.921683179	0.899553277	0.946446242	0.461438961	0.263876534	0.07986378	0.268194331	0.283990282	0.368330982	0.949498251	0.553167441	0
0.142178693	0.40510098	0.159650454	1	0.502551069	0.152201919	0.066716386	0.250153248	0.063948719	0.20051151	0.128534008	0.1540899	0.031106448	0.101841968	0.666666667	0.5	0.5	1	0.333333333	0.5	0.666666667	0.5	0.333333333	0.5	0.5	0.333333333	0.333333333	0.333333333	0.222378924	0.171701852	0.015966925	0.132788005	0.055596731	1	0.866550627	0.097900009	0.071360188	0.144702205	0.012764704	0.085483844	0.94216695	0.071467421	0
0.19162438	0.19713966	0.41914403	0.042679505	0.533474259	0.084718263	0.100592221	0.100962533	0.096940543	0.221163091	0.139524518	0.122020807	0.356242718	0.062529329	0.333333333	0.25	0.25	0.666666667	0.333333333	0.25	0.666666667	0.25	0.666666667	0.5	0.75	0.333333333	0.333333333	0.333333333	0.149777412	0.433726533	0.065245264	0.278516045	0.151417109	0.622680152	0.772202125	0.126269567	0.062831649	0.299683515	0.589461158	0.069414341	0.641713042	0.111580871	1
0.448566456	0.138792751	0.30527781	0.021744517	0.00318501	0.116189807	0.044999481	0.205477497	0.185569308	0.117880075	0.041442409	0.216263331	0.01163626	0.031979167	0.666666667	0.5	0.75	0.333333333	0	0.25	0.333333333	0.25	0.666666667	0.25	0.5	0.333333333	0.666666667	0.333333333	0.067006305	0.405087906	0.035903565	0.842150063	0.492919669	0.981994945	0.968983697	0.151288491	0.155702746	0.112191876	0.648292262	0.374895535	0.923661991	0.309651616	1
0.354031461	0.173249398	0.0742703	0.009495792	0.072787856	0.11130349	0.048246523	0.154036178	0.143659973	0.439277119	0.185043993	0.147716788	0.031908856	0.088419737	0.666666667	0.5	0.25	0	0	0.25	1	0.25	0.666666667	0.5	0	0.333333333	0.333333333	0.333333333	0.073032119	0.204129822	0.050320838	0.901612025	0.125308528	0.549506444	0.933769057	0.248732843	0.048006516	0.162714979	0.201379516	0.078726033	0.862535924	0.08731134	1
0.162864416	0.511462809	0.470775825	0.021996206	0.801497031	0.13575552	0.060525978	0.172483147	0.142615989	0.306218271	0.442894748	0.121801588	0.457063081	0.086026379	0.666666667	0.5	0.5	0.333333333	0.333333333	0.25	0.666666667	0.25	0.333333333	0.5	0.5	0.333333333	0.333333333	0.666666667	0.052777982	0.068015692	0.023402888	0.326660054	0.031433271	0.246070163	0.978149001	0.240749695	0.095816162	0.151470923	0	0.046000576	0.117339961	0.117683168	0
0.228506402	0.186933752	0.358352419	0.635559362	0.46376634	0.124494322	0.14608701	0.444869116	0.122455557	0.227721928	0.199788979	0.11776808	0.202546627	0.153240824	0.333333333	0.25	0.75	1	0.666666667	0.25	1	0.75	0.333333333	0.25	0.25	0	0	0.333333333	0.103604482	0.320433323	0.035901607	0.171697888	0.094326932	0.67314491	0.73156981	0.310852412	0.080540499	0.142184548	0.248315062	0.126306685	0.422383478	0.093308683	1
0.028677621	0.178989374	0.444440876	0.014019423	0.702067808	0.187824515	0.315250827	0.069727805	0.108602505	0.216434235	0.449044802	0.195255762	0.742515794	0.052251003	0.333333333	0.25	0.5	0.666666667	0.333333333	0.25	1	0.25	0.333333333	0.5	0.5	0.333333333	0.333333333	0.333333333	0.212912114	0.153415043	0.031538582	0.122949628	0.021968723	0.186461041	0.872783299	0.396555778	0.108467885	0.112023974	0.098522768	0.115885893	0.083081995	0.146507627	1
0.34977296	0.119296373	0.238339408	0.008535028	0.005251083	0.166124622	0.059480308	0.373877956	0.290840011	0.118007326	0.107340552	0.179394588	0.063974531	0.214924923	0.666666667	0.5	0.75	0.333333333	0.666666667	0.5	0.333333333	0.5	0.666666667	0.5	0.5	0.333333333	1	0.666666667	0.089281813	0.434628652	0.013394006	0.880184852	0.568718556	0.90013512	0.978162045	0.095299653	0.095043672	0.36555271	0.221504469	0.119297933	0.325191598	0.107759046	1
0.298389477	0.248466256	0.126323049	0.018149154	0.22299588	0.097123	0.018799669	0.181295949	0.065239574	0.116605287	0.131042056	0.120728027	0.007138139	0.027716744	1	0.75	0.5	0	0.666666667	0.25	0.333333333	0.25	0.333333333	0.25	0.75	0.666666667	0.666666667	0.333333333	0.11340687	0.260184527	0.458474904	0.51491495	0.084381985	0.928009982	0.955555582	0.223199866	0.114001806	0.171022624	0.200737117	0.090827321	0.869169886	0.133701676	1
0.282474607	0.234912162	0.237042457	0.0093715	0.352507169	0.108908706	0.149595036	0.20234146	0.198776454	0.41689756	0.340563731	0.365754746	0.124259251	0.054718754	0.333333333	0.25	0.5	0	0	0.25	1	0.25	0.666666667	0.5	0.5	0.333333333	0.333333333	0	0.127402171	0.244718322	0.097855337	0.461870133	0.073403121	0.632353421	0.698526653	0.179759814	0.13391517	0.226787118	0.050244523	0.149124784	0.463287084	0.122693576	1
0.092906174	0.100214271	0.34701453	0.020785012	0.516087157	0.448037374	0.029450316	0.496118799	0.109594701	0.206860076	0.120039698	0.130280953	0.347711043	0.218456167	0.333333333	0.25	0.5	0.333333333	0.333333333	0.5	0.666666667	0.5	0.333333333	0.25	0.5	0	0.333333333	0.333333333	0.236577816	0.16523599	0.02310021	0.154589845	0.008501405	0.053159845	0.984575607	0.144548081	0.060170665	0.149828776	0.059605798	0.144683217	0.108315651	0.133117709	1
0.352937286	0.219587743	0.157682176	0.082185348	0.178386652	0.051979013	0.051790143	0.189504854	0.120286925	0.216518253	0.194962797	0.249429649	0.017505925	0.076217779	1	0.25	0.25	0.666666667	0	0.25	0.333333333	0.25	0	0.25	0.75	0.333333333	0	0.333333333	0.184102181	0.433928952	0.028477129	0.292955854	0.188302855	0.875194151	0.931635568	0.284730334	0.136911678	0.248256557	0.218639164	0.158235067	0.955888326	0.053357991	1
0.270808423	0.309468816	0.074679557	0.027971959	0.333565787	0.297828192	0.093786158	0.470573506	0.193284357	0.165056442	0.183010841	0.227205279	0.014005234	0.09039609	1	0.75	0.5	0.666666667	0.666666667	0.75	0.333333333	0.75	0.333333333	0.25	0.25	0.333333333	0.666666667	1	0.135768262	0.233652253	0.781622185	0.380065057	0.099441852	0.950761726	0.970027098	0.163920844	0.126758004	0.365058503	0.319550282	0.150494966	0.9554513	0.066538735	1
0.228591827	0.230025706	0.281754298	0.012074686	0.665960128	0.273557072	0.234250481	0.290626865	0.141526398	0.458274633	0.316666677	0.260420542	0.370010602	0.15374498	0.333333333	0.25	0.25	0.333333333	0.333333333	0.25	1	0.25	0.333333333	0.75	0.5	0.333333333	0	0.666666667	0.177163533	0.298880748	0.060325891	0.274313186	0.050100412	0.449029461	0.899395391	0.288493561	0.09546995	0.17245013	0.058646508	0.155523527	0.377753931	0.090411987	1
0.262696994	0.227947853	0.278789607	0.041885822	0.401048563	0.143298911	0.138078773	0.22728137	0.16787345	0.189167836	0.249191863	0.205839214	0.210675931	0.108696798	0.666666667	0.5	0.5	0.666666667	0.333333333	0.25	0.333333333	0.25	0.333333333	0.25	0.5	0.333333333	0.666666667	0.333333333	0.133700943	0.338066691	0.198348027	0.578587496	0.178527086	0.792730423	0.833921235	0.223029783	0.152223415	0.16959539	0.231412271	0.23851797	0.528668143	0.125510493	1
0.152818618	0.330201038	0.301443258	0.023946116	0.274024005	0.139032405	0.286190498	0.283685893	0.187009371	0.075500471	0.201534052	0.190492864	0.342531526	0.195307414	0.333333333	0.25	0.75	0.666666667	0	0.25	0.666666667	0.25	0.333333333	0	0.5	0.333333333	0.333333333	0.333333333	0.336648698	0.255204088	0.078464622	0.364127455	0.061232467	0.475228164	0.735399097	0.355921788	0.175633995	0.564042238	0.418594399	0.116734188	0.249308985	0.093200182	1
0.184220148	0.151065142	0.255680082	0.027817003	0.279560633	0.106313288	0.293310263	0.421465977	0.220196278	0.325877319	0.176993494	0.216172154	0.197777666	0.148313314	0.333333333	0.25	0.75	0.333333333	0.666666667	0.25	0.666666667	0.25	0.666666667	0.75	0.25	0.333333333	0.666666667	0.333333333	0.106384525	0.332115113	0.087326079	0.447552917	0.045754532	0.505638642	0.484736961	0.060608276	0.046575142	0.253646507	0.205468896	0.037340277	0.447424792	0.073658352	0
0.390907786	0.257324358	0.332305734	0.004685925	0.632398544	0.177881427	0.251891165	0.208372098	0.116717123	0.288675234	0.250283945	0.37563714	0.223330728	0.103267745	0.333333333	0.25	0.75	0	0.666666667	0.25	1	0.25	0	0.25	0.25	0.666666667	0	0.333333333	0.250293053	0.389738508	0.02397754	0.423842657	0.080769385	0.503871034	0.8017627	0.156950857	0.176640563	0.11464609	0.273538158	0.074006234	0.390445661	0.030949966	1
0.095663769	0.062866783	0.493037743	0.303940444	0.328628878	0.068494873	0.058907851	0.669840674	0.022415403	0.182916705	0.182754355	0.027162198	0.270534669	0.597468491	0.333333333	0.25	0.5	1	0.333333333	0.25	0.666666667	1	0.333333333	0.5	0.5	0.333333333	0.333333333	0.666666667	0.194685401	0.389826289	0.127492246	0.148107775	0.200140166	0.797616866	0.814303978	0.05615766	0.112921027	0.098775427	0.137611279	0.092284993	0.436351247	0.093546579	0
0.1307839	0.034306234	0.633585056	0.031018372	0.208120615	0.193916621	0.21187688	0.35485177	0.137993732	0.144490753	0.353627875	0.192474198	0.212161031	0.122593981	0.333333333	0.25	0.5	0.333333333	0.333333333	0.5	0.666666667	0.5	0.333333333	0	0.5	0.333333333	0.333333333	0.333333333	0.055599133	0.382902914	0.153015295	0.592670736	0.227706427	0.708910675	0.902054156	0.14405491	0.128472572	0.273382472	0.391876864	0.07491709	0.549770825	0.126790441	0
0.15511153	0.03876432	0.256071927	0.041935546	0.222734193	0.112620191	0.163800164	0.230335232	0.230668057	0.471265618	0.384902521	0.154485586	0.055957124	0.158791304	0.666666667	0.5	0.5	0.333333333	0.333333333	0.5	0.666666667	0.5	0.333333333	0.5	0.5	0.333333333	0.333333333	0.666666667	0.265001915	0.41245642	0.372569117	0.707933849	0.197244067	0.658764137	0.959433235	0.100435564	0.180543781	0.251109035	0.199699149	0.111332511	0.641229911	0.104118894	1
0.155719098	0.035222449	0.478815801	0.026672155	0.373126086	0.20618062	0.385823107	0.333164112	0.189812269	0.271369523	0.308278374	0.244120944	0.330823211	0.175040651	0.333333333	0.25	0.5	0.333333333	0.333333333	0.5	0.666666667	0.5	0.333333333	0.5	0.5	0.333333333	0.333333333	0.666666667	0.157030533	0.429901052	0.156432617	0.542959636	0.340674172	0.55434894	0.657389183	0.202246822	0.143527501	0.25217018	0.215670056	0.08692683	0.446816363	0.111645679	1
0.402870467	0.345505439	0.081499843	0.168702565	0.00355913	0.159856741	0.076140093	0.19275502	0.139646007	0.228076781	0.115960876	0.117689327	0.071789914	0.058816405	1	0.75	0.25	1	0	0.5	0.333333333	0.5	0.666666667	0.5	0.75	0.333333333	1	0.333333333	0.076501985	0.034438954	0.971707594	0.733344158	0.852138788	0.950782684	0.92492	0.308443489	0.090806854	0.051626901	0.404986953	0.110504505	0.918272941	0.143001255	1
0.308324005	0.49319481	0.168610456	0.028830603	0.480808706	0.192872166	0.076652263	0.394554279	0.115986022	0.365888843	0.188979469	0.23285739	0.180526481	0.110046953	0.666666667	0.5	0.5	0.666666667	0.333333333	0.5	0.333333333	0.5	0.333333333	0.75	0.5	0.333333333	0.333333333	0.333333333	0.178096684	0.1858062	0.721106023	0.215430496	0.079475368	0.390157145	0.95545912	0.227814852	0.174601593	0.058245799	0.518084813	0.165130309	0.455031468	0.147286854	0
0.14479619	0.189434671	0.249499594	0.046246978	0.249353264	0.141209889	0.152154728	0.104687684	0.071760923	0.263321837	0.304692399	0.098415657	0.194992114	0.495267159	0.666666667	0.5	0.5	0.333333333	0.333333333	0.5	0.666666667	0.5	0.333333333	0.5	0.5	0.333333333	0.333333333	0.666666667	0.109065434	0.156063289	0.709774599	0.585369425	0.190708837	0.494744735	0.653641141	0.220408647	0.098577498	0.401816697	0.08385061	0.318794523	0.405727466	0.117789377	0
0.424453597	0.045689242	0.284444012	0.002976876	0.001064423	0.14850645	0.125558151	0.312661285	0.250544403	0.288622728	0.206524087	0.234936329	0.007567423	0.031514206	0.666666667	0.5	0.5	0.333333333	0.333333333	0.5	0.666666667	0.5	0.333333333	0.5	0.5	0.333333333	0.333333333	0.666666667	0.226909746	0.773593618	0.02446763	0.82588553	0.281611715	0.969460827	0.959353505	0.196305815	0.129313863	0.210356919	0.542649798	0.177726643	0.960137966	0.119145732	1
0.297874461	0.103456819	0.184685989	0.008581966	0.000902539	0.050966554	0.016887829	0.058856322	0.059911311	0.010017885	0.053091598	0.080734235	0.052332643	0.214692519	0.333333333	0.25	0.75	0	0	0.25	0	0.25	0.666666667	0	0.5	0.333333333	0.666666667	0.333333333	0.144261314	0.302516293	0.049714738	0.87123835	0.670248034	0.825944747	0.919048947	0.201238623	0.13816346	0.581303554	0.143904471	0.326666995	0.772132888	0.250206521	1
0.24579833	0.044896454	0.357379005	0.011225421	0.2452695	0.138113154	0.314679627	0.245922238	0.177434658	0.422692081	0.513044725	0.239118115	0.206576248	0.086337788	0.333333333	0.25	0.5	0	0.333333333	0.25	0.666666667	0.25	0.333333333	0.5	0.5	0.333333333	0.333333333	0.666666667	0.157794203	0.303006118	0.321656154	0.680320848	0.174467429	0.842143818	0.627702093	0.185330216	0.185680714	0.277549621	0.182498407	0.230897368	0.419770031	0.213767226	0
0.144628546	0.012820575	0.345351548	0.02365036	0.337556233	0.158258822	0.123124693	0.178363848	0.075545468	0.198500074	0.402148705	0.138594913	0.266511063	0.23330602	0.333333333	0.25	0.5	0.333333333	0.333333333	0.5	1	0.5	0.333333333	0.5	0.5	0.333333333	0.333333333	0.666666667	0.205812589	0.461043706	0.123270778	0.509008633	0.145075523	0.756857494	0.955358635	0.269447851	0.208402614	0.215402913	0.367487767	0.304274587	0.504052235	0.242935116	1
0.438342114	0.398936667	0.256295797	0.010888444	0.578624776	0.142348572	0.184796779	0.301726249	0.400709874	0.421227223	0.267879978	0.302102812	0.323415647	0.150661482	0.666666667	0.5	0.25	0	1	0.25	0.666666667	0.25	0.666666667	0.25	0.25	0.333333333	0.666666667	0.666666667	0.096339967	0.146326903	0.095734624	0.280899227	0.163360845	0.345261935	0.918550796	0.353581732	0.131754658	0.066379555	0.250189688	0.438301853	0.185995472	0.163012361	0
0.3038859	0.386664155	0.181822768	0.030427833	0.596904275	0.309712519	0.230519923	0.455032001	0.151841296	0.438075955	0.45363755	0.380404277	0.183853498	0.069735071	0.666666667	0.5	0.25	0.333333333	0.666666667	0.5	0.666666667	0.5	0.333333333	0.5	0.5	0.333333333	0.333333333	0.666666667	0.054835177	0.174582406	0.115932319	0.255015962	0.071797275	0.389566737	0.962191111	0.145960211	0.125775628	0.254712261	0.134423582	0.109040763	0.283845867	0.100396554	0
0.104725847	0.00472949	0.478609188	0.040231261	0.541550239	0.286848416	0.210403074	0.462594778	0.178785984	0.297626456	1	0.268210561	0.291320578	0.305579547	0.333333333	0.25	0.5	0.333333333	0.333333333	0.5	0.666666667	0.5	0.333333333	0.5	0.5	0.333333333	0.333333333	0.666666667	0.302427944	0.321482766	0.056824648	0.248043248	0.077557293	0.26379764	0.962422962	0.147639005	0.147590819	0.089004468	0.123342783	0.14975018	0.214593387	0.171090785	0
0.090277481	0.251137592	0.26219417	0.038569855	0.752649944	0.15181587	0.099347708	0.165859745	0.191146306	0.148061049	0.211030026	0.215247966	0.408500102	0.041446233	0.333333333	0.25	0.5	0.333333333	0.333333333	0.25	0.666666667	0.25	0.666666667	0.25	0.5	0.333333333	0.333333333	0.333333333	0.129543564	0.1877639	0.487990504	0.344434605	0.057354177	0.537972103	0.890017025	0.311501494	0.059604994	0.190171439	0.086389456	0.168128012	0.251705474	0.18453867	1
0.251928388	0.276113978	0.409780768	0.034830137	0.373865642	0.044791213	0.105092292	0.196173619	0.112183389	0.252722949	0.496934286	0.184342984	0.262007473	0.23076326	0.666666667	0.75	0.5	0.666666667	0.333333333	0.25	0.666666667	0.25	0.333333333	0.5	0.5	0.333333333	0.333333333	1	0.07856234	0.128855077	0.066875829	0.100886564	0.036389569	0.322306903	0.807331578	0.22744811	0.049863308	0.069581078	0.001286527	0.056453051	0.212871798	0.079961772	0
0.079516101	0.157494886	0.23593368	0.040544453	0.623282173	0.21615361	0.220354948	0.464498435	0.128965558	0.252042322	0.254749599	0.271811121	0.275517165	0.333106617	0.333333333	0.25	0.5	0.333333333	0.333333333	0.5	0.666666667	0.5	0.333333333	0.5	0.5	0.333333333	0.333333333	0.666666667	0.131104771	0.243292311	0.067961901	0.348637301	0.067491871	0.256309122	0.826320023	0.240843063	0.183794801	0.088928144	0.124332067	0.186800072	0.609155123	0.150969432	1
0.197112615	0.253527075	0.386403176	0.005496725	0.870035628	0.136069624	0.05429497	0.286465551	0.06937491	0.287102177	0.108218668	0.101485328	0.388383127	0.157737803	0.666666667	0.5	0.5	0.333333333	0.333333333	0.5	0.666666667	0.5	0.333333333	0.5	0.5	0.333333333	0.333333333	0.666666667	0.084807033	0.285361504	0.036136754	0.595074316	0.129341385	0.620014007	0.937622023	0.021254741	0.080295661	0.31669505	0.245873584	0.07225862	0.36734812	0.135381358	1
0.173360125	0.007882835	0.270964281	0.052242414	0.256161628	0.233963536	0.165668228	0.183875932	0.04549355	0.155258115	0.222971863	0.168211406	0.359113316	0.161127483	0.333333333	0.25	0.25	0.666666667	0	0.75	0.666666667	0.75	0	0.5	0.5	0.333333333	0.333333333	0.666666667	0.544797008	0.31309577	0.565454646	0.207699824	0.115638379	0.236983734	0.885774603	0.253846733	0.594433318	0.494200413	0.271904826	0.604320091	0.205307604	0.271232634	1
0.058615706	0.362465475	0.008633424	0.01719391	0.63180737	0.305727917	0.075255051	0.788242288	0.225044626	0.245229473	0	0.191774382	0.801262098	0.112927405	0.333333333	0.25	0.75	0.666666667	0	0.75	0.666666667	0.75	0.666666667	0.75	0.25	0	0.666666667	0.333333333	0.169069354	0.24542902	1	0.683796665	0.120048316	0.235538704	1	0.680915467	0.592554452	0.043613875	0.860135165	0.636249719	0.24336645	0.463364258	1
0.177964296	0.091148692	0.366782172	0.024234219	0.328941636	0.186938521	0.419593171	0.463550334	0.175475333	0.329734985	0.283683422	0.279665005	0.181281226	0.082627323	0.333333333	0.25	0.5	0.333333333	0.333333333	0.5	0.666666667	0.5	0.333333333	0.5	0.5	0.333333333	0.333333333	0.666666667	0.295850947	0.418850369	0.103472851	0.445257314	0.103507489	0.514465562	0.71518924	0.206425874	0.172514697	0.146041259	0.25827913	0.391331486	0.385053326	0.140746376	1
0.261924099	0.025950369	0.196406912	0.023427884	0.623125164	0.177895108	0.158122971	0.206249533	0.123042217	0.892663093	0.287914143	0.264516191	0.421094539	0.046536825	0.333333333	0.25	0.25	0.333333333	0.333333333	0.25	0.666666667	0.25	0.333333333	0.5	0.25	0.333333333	0.333333333	0.333333333	0.25415917	0.29143061	0.246363987	0.236664513	0.065617822	0.367711934	0.824103818	0.271162837	0.116199788	0.328130541	0.174437735	0.110283583	0.258883567	0.141071496	1
0.331829715	0.203663719	0.159029827	0.020221682	0.443289085	0.182740271	0.187576349	0.235641434	0.08686407	0.391814641	0.396194457	0.226917243	0.39142601	0.200102583	0.666666667	0.5	0.5	0.333333333	0.666666667	0.5	1	0.5	0.333333333	0.5	0.75	0.333333333	0.333333333	0.666666667	0.236061708	0.211917658	0.054654747	0.352498316	0.038848391	0.40772724	0.777578022	0.224639201	0.110540153	0.242600813	0.080069304	0.146838134	0.353886185	0.113621865	0
0.2032134	0.161449639	0.273482274	0.023762543	0.520388102	0.593678496	0.300554727	0.324513994	0.134358023	0.334257905	0.539010724	0.225350156	0.271724814	0.245541793	0.333333333	0.25	0.5	0.333333333	0.333333333	0.5	0.333333333	0.5	0.333333333	0.5	0.5	0.333333333	0.333333333	0.333333333	0.56003451	0.388109023	0.097026174	0.355132546	0.058781451	0.451052742	0.471050484	0.479493239	0.141073235	0.125429115	0.076842033	0.150063119	0.362452254	0.239478068	0
0.268414945	0.080851099	0.526541063	0.006767338	0.295163677	0.07296459	0.064009311	0.06700525	0.103013306	0.227213879	0.391596871	0.196957821	0.106386439	0.207320775	0.333333333	0.25	0.5	0	0.333333333	0.25	0.333333333	0.25	0.666666667	0.25	0.5	0.333333333	0.333333333	0.333333333	0.087810084	0.36555512	0.030075647	0.726861286	0.075170716	0.54560326	0.913477442	0.285774767	0.122751122	0.447957767	0.097155183	0.056383438	0.923559125	0.126157069	0
0.407675673	0.02383235	0.235221492	0.005291402	0.042004573	0.132549801	0.055196906	0.33625003	0.262612381	0.192996998	0.170705275	0.144585711	0.025612865	0.120836352	0.333333333	0.25	0.5	0	0	0.5	0.333333333	0.5	0.333333333	0.5	0.75	0.333333333	0.666666667	0.666666667	0.17088464	0.086591929	0.026147321	0.974647918	0.044601049	0.811055545	0.92318735	0.300627762	0.130961668	0.370387127	0.128485034	0.277589686	0.962241147	0.199014219	1
0.106944332	0.301269041	0.211123295	0.044570212	0.455777601	0.292835061	0.355197262	0.523395806	0.126877297	0.26316414	0.124201994	0.205495269	0.454807135	0.283552541	0.333333333	0.25	0.5	0.333333333	0.333333333	0.5	0.666666667	0.5	0.333333333	0.5	0.5	0.333333333	0.333333333	0.666666667	0.583890954	0.157583446	0.036753813	0.211896963	0.044985861	0.230289394	0.726245751	0.136833957	0.107576292	0.184671092	0.122558038	0.216034638	0.148587281	0.110582489	1
0.308354092	0.196386884	0.24324158	0.02672747	0.303846812	0.08130822	0.0353415	0.176665946	0.073225441	0.277225905	0.146235489	0.102109016	0.133005647	0.026119891	0.666666667	0.5	0.5	0.666666667	0	0.25	0.666666667	0.25	0.333333333	0.25	0.75	0.333333333	0	1	0.145422832	0.439428578	0.104403898	0.448499016	0.109898468	0.772414404	0.955597093	0.351947996	0.111188017	0.336332558	0.378004033	0.318203326	0.580376992	0.165470887	1
0.056675493	0.187696267	0.093254068	0.039489634	0.447215224	0.410731029	0.208899512	0.239818648	0.070325042	0.348255182	0.430499454	0.150228454	0.285006727	0.121025871	0.333333333	0.25	0.25	0.333333333	0.333333333	0.5	0.666666667	0.5	0.333333333	0.5	0.5	0.333333333	0.333333333	0.666666667	0.451832031	0.260934908	0.775235182	0.397212344	0.062586173	0.368246828	0.863554687	0.252874624	0.189595931	0.164755779	0.232326889	0.434171177	0.23311287	0.116197989	1
0.17403514	0.333909801	0.199808096	0.037746383	0.236860446	0.100574994	0.238123833	0.187535203	0.609347658	0.380623863	0.35356659	0.137164303	0.155873669	0.084149321	0.666666667	0.5	0.5	0.333333333	0.333333333	0.25	1	0.25	1	0.5	0.5	0.333333333	0.333333333	0.333333333	0.130836817	0.436199941	0.17807892	0.606159833	0.175224249	0.644020391	0.629742703	0.26065973	0.066108516	0.117599413	0.194136913	0.152474781	0.563486733	0.122841211	1
0.174668775	0.406565865	0.139112211	0.018020939	0.371823804	0.157645166	0.089103101	0.338153088	0.158164845	0.29239576	0.219849444	0.142466504	0.228873506	0.087768792	0.666666667	0.5	0.25	0	0.666666667	0.5	0.666666667	0.5	0.333333333	0.5	0.5	0.333333333	0.333333333	0	0.151007801	0.400475775	0.128616197	0.710011828	0.096770176	0.632830003	0.841114564	0.182975256	0.130536031	0.223538466	0.194649643	0.245447571	0.655215833	0.100518224	0
0.172820127	0.065578648	0.37929357	0.025468326	0.441203826	0.189161979	0.360756052	0.195076292	0.126303345	0.376428168	0.378662121	0.158344064	0.350140158	0.142412537	0.333333333	0.25	0.5	0.666666667	0.333333333	0.25	1	0.25	0.333333333	0.5	0.25	0.333333333	0.333333333	1	0.253297812	0.290821165	0.153949907	0.456031066	0.145122475	0.574349102	0.760884907	0.253158449	0.23336273	0.316790687	0.233983374	0.205496609	0.419254338	0.161886236	1
0.223964129	0.292855259	0.171677348	0.016899379	0.317028766	0.266515369	0.109670624	0.376825424	0.132754632	0.350871638	0.284113282	0.136671508	0.251194791	0.074010098	0.666666667	0.5	0.25	0.333333333	0.333333333	0.5	0.666666667	0.5	0.666666667	0.5	0.5	0.333333333	0.333333333	0.666666667	0.060344118	0.157940251	0.172826258	0.337778767	0.047000092	0.449549873	0.912130779	0.278953738	0.086005463	0.095347246	0.137190289	0.259285789	0.485078062	0.167091288	0
0.292800206	0.26753817	0.312897621	0.013106543	0.409393643	0.104691214	0.124345256	0.1835259	0.101176684	0.344870785	0.209351694	0.083696243	0.574749823	0.093217673	0.333333333	0.25	0.5	0	0.333333333	0.25	0.666666667	0.25	0.333333333	0.5	0.5	0	0.333333333	0.333333333	0.138065447	0.170153171	0.352840798	0.446444806	0.059091599	0.232593172	0.831308605	0.220526373	0.158002625	0.191279707	0.208284903	0.716845973	0.13725623	0.239981325	0
0.134954288	0.248856581	0.08094278	0.011599375	0.317551112	0.109697377	0.065638699	0.228850361	0.183382187	0.354597525	0.286715167	0.152069846	0.230462344	0.178805221	0.333333333	0.25	0.25	0	0.333333333	0	0.666666667	0.25	0.666666667	0.5	0.5	0.333333333	0.333333333	0.666666667	0.191746964	0.49860036	0.397615999	0.613228806	0.133194658	0.66913992	0.957620231	0.381531887	0.128530746	0.23446432	0.320174523	0.189813142	0.601932232	0.14476017	0
0.139649161	0.064219164	0.262693693	0.031183937	0.559344044	0.233475863	0.095093735	0.253466304	0.096580321	0.314099794	0.409209125	0.124473466	0.387747865	0.370349296	0.333333333	0.25	0.5	0.333333333	0.666666667	0.5	1	0.5	0.666666667	0.75	0.75	0.333333333	0.666666667	1	0.335531879	0.323284386	0.06592078	0.361131295	0.075713255	0.463125788	0.95322996	0.219687302	0.159983574	0.103986781	0.064554988	0.368512706	0.52953934	0.068627261	1
0.123196587	0.083108988	0.327319391	0.0324978	0.183920946	0.086907296	0.056266942	0.080300584	0.029993417	0.184395227	0.227612396	0.056142835	0.143147351	0.464107706	0.666666667	0.5	0.5	0.333333333	0.333333333	0.5	0.666666667	0.5	0.333333333	0.5	0.5	0.333333333	0.333333333	0.666666667	0.078633899	0.381677119	0.436555663	0.676434546	0.224664295	0.767071224	0.911357461	0.189827312	0.120193731	0.439025284	0.421199457	0.284835159	0.55704113	0.134987836	1
0.112091534	0.032160911	0.946376295	0.082426998	0.309758042	0.071817547	0.045567521	0.09143691	0.080549871	0.176935465	0.121841952	0.096702667	0.421563322	0.138041904	0.333333333	0.25	0.5	1	0	0.25	0.666666667	0.25	1	0.5	0.5	0.333333333	0.333333333	0.333333333	0.182081355	0.212012284	0.005708248	0.141898188	0.080071139	0.420249617	0.969713231	0.470536987	0.068307422	0.241501339	0.330773301	0.26971019	0.196423645	0.268766988	1
0.107026231	0.221081645	0.282455704	0.091504739	0.673902573	0.166479101	0.049778616	0.322616277	0.099490923	0.191711201	0.245005056	0.068393718	0.271334912	1	0.333333333	0.25	0	0.666666667	0.666666667	0.25	0.666666667	0.25	0.666666667	0.5	0.75	0	0.333333333	1	0.371633255	0.054999664	0.094812144	0.123155988	0.018169254	0.202123245	0.956217526	0.127657094	0.130159488	0.273195507	0.089867005	0.358071034	0.353723536	0.060929796	1
0.177956947	0.067016423	0.219249075	0.010935061	0.002299334	0.065064569	0.081314808	0.001864541	0.049615886	1	0.0455487	0.086091041	0.029111915	0.276031241	0.333333333	0.25	1	0	0	0.25	0.333333333	0.25	0.666666667	1	0.5	0	1	1	0.436640774	0.102028595	0.006658083	0.977246156	0.923093619	0.887550268	0.800431474	0.37140707	0.266702589	0.478382569	0.120492708	0.594177856	0.956334394	0.1581615	1
0.128132396	0.059524086	0.101197881	0.035578395	0.423443509	0.202120922	0.237576256	0.308760475	0.100840225	0.263026466	0.301953283	0.232191395	0.138564309	0.187874034	0.333333333	0.25	0.5	0.333333333	0.333333333	0.5	1	0.5	0.333333333	0.5	0.5	0.333333333	0.333333333	0.666666667	0.178131431	0.21793304	0.843933544	0.364852101	0.165935444	0.388482687	0.627947215	0.139994846	0.139820187	0.104567233	0.155953359	0.216447937	0.521425263	0.163883338	1
0.117906007	0.101149226	0.195410668	0.059106848	0.283830064	0.090811889	0.033161081	0.00555859	0.018380872	0.126551121	0.096300513	0.046086138	0.231209839	0.251669287	0.333333333	0.25	0.75	1	0.666666667	0.5	0.333333333	0	0.333333333	0.5	0.5	0.666666667	0.333333333	0.333333333	0.197976384	0.587900087	0.63747525	0.340027767	0.194089491	0.743625507	0.928530866	0.292932526	0.181470447	0.351167642	0.425149169	0.489950327	0.591780351	0.107840431	1
0.099614922	0.018268729	0.276221407	0.049332446	0.286505643	0.098458091	0.109610058	0.035694911	0.01911104	0.197033602	0.105961707	0.031091466	0.150988608	0.149148245	0.333333333	0.25	0.5	0.333333333	0.333333333	0.5	0.666666667	0.5	0.333333333	0.5	0.5	0.333333333	0.333333333	0.666666667	0.315638235	0.421954478	0.187230592	0.43052268	0.154829783	0.656124685	0.903617575	0.496430118	0.240090939	0.216443992	0.692814964	0.790698639	0.59678335	0.161371684	1
0.424646987	0.093510902	0.118446361	0.011550209	0.005232897	0.104007874	0.022804359	0.178590401	0.089281625	0.153959338	0.151327421	0.077018571	0.009180037	0.137941534	1	0.75	0.25	0.333333333	0	0.75	0.333333333	0.75	0.666666667	0.5	0.75	0.333333333	0.333333333	0.333333333	0.129323572	0.238137626	0.050337393	0.876947073	0.44000283	0.934011668	0.922347057	0.41478039	0.156908712	0.637022269	0.170270164	0.280071341	0.884513982	0.121134132	1
0.152031445	0.111178709	0.413490259	0.049122822	0.289118182	0.119322839	0.20969037	0.286633806	0.135000093	0.286295474	0.175455116	0.176047352	0.166555851	0.14097062	0.333333333	0.25	0.5	0.333333333	0.333333333	0.5	0.666666667	0.5	0	0.5	0.25	0.333333333	0.666666667	0.333333333	0.071894926	0.530387274	0.395218276	0.503666625	0.193736828	0.726398066	0.869671255	0.20385437	0.200300192	0.426518337	0.561141889	0.101321367	0.669950606	0.068157042	1
0.087560527	0.054844664	0.314972661	0.059491853	0.472347072	0.190344985	0.157486715	0.074150984	0.01506793	0.141528075	0.19700781	0.046610125	0.348059843	0.033670549	0.333333333	0.25	0.5	0.333333333	0.333333333	0.5	0.666666667	0.5	0.333333333	0.5	0.5	0.333333333	0.333333333	0.333333333	0.365592904	0.353686621	0.065536747	0.290701217	0.093060397	0.189330767	0.922098645	0.441359507	0.21485032	0.255059461	0.157657556	0.464916088	0.365553557	0.300407573	1
0.107892269	0.15211161	0.422308592	0.044206109	0.414079087	0.103191119	0.041307971	0.205557598	0.067201296	0.131539158	0.151918563	0.08447301	0.21089015	0.345185764	0.333333333	0.25	0.75	0.666666667	0.666666667	0.25	0.333333333	0.25	0.333333333	0.25	0.75	0.333333333	0.333333333	0.333333333	0.216714291	0.283937188	0.033290899	0.356557082	0.039636086	0.543676135	0.967718769	0.315387042	0.12441441	0.372225561	0.279268472	0.166264889	0.459739089	0.120525177	1
0.316772967	0.055737331	0.333533969	0.006074396	0.115150069	0.099715286	0.319517669	0.346837743	0.171750408	0.287759772	0.101352187	0.280909102	0.105854028	0.054275158	0.666666667	0.5	0.5	0.333333333	0.333333333	0.5	0.666666667	0.5	0.333333333	0.5	0.5	0.333333333	0.333333333	0.666666667	0.203927175	0.826239363	0.02709781	0.7370979	0.304784408	0.969316099	0.917888774	0.180156486	0.150872618	0.239537677	0.751276518	0.123423552	0.838016684	0.130500229	1
0.260213725	0.171587203	0.29934063	0.008673613	0.003751183	0.075089131	0.04769924	0.05077499	0.037594634	0	0.100060742	0.076696915	0.041787936	0.146397521	0.666666667	0.5	0.75	0	0	0.25	0.333333333	0.25	0.333333333	0	0.75	0.333333333	0.666666667	0.333333333	0.084407987	0.325362334	0.207062325	0.799649813	0.643074627	0.854241253	0.906389754	0.311201749	0.137605759	0.520900862	0.39175752	0.246555828	0.970008079	0.239770243	1
0.154861297	0.084121035	0.113531704	0.012163278	0.000879418	0.085411001	0.012230722	0.053156978	0.025453929	0.361988833	0.039810273	0.013927414	0.091250047	0.394938889	0.333333333	0.25	0.5	0.666666667	0	0.75	1	0.75	0.333333333	0.5	0.75	0.333333333	0.333333333	0.333333333	0.190199873	0.110388601	0.020299711	0.683763935	0.935051658	0.156378012	0.925669282	0.209518241	0.159761769	0.30559243	0.11672268	0.122435063	0.071402665	0.115915853	1
0.087564497	0.041205092	0.047708132	0.004341784	0.000235188	0.040413073	0.039793818	0.096319352	0.085758709	0.101491344	0.108569372	0.069453534	0.022746688	0.199953796	0.333333333	0.25	0	0	0	0.25	0.333333333	0.25	0.666666667	0.25	0.5	0	0.666666667	0.333333333	0.384365009	0.597583482	0.200325604	0.921454053	0.189616504	0.895654589	0.957568299	0.326027924	0.138263614	0.220163276	0.191936808	0.362812972	0.891041219	0.203935075	0
0.264777502	0.106782839	0.30672952	0.025947436	0.005503813	0.085540914	0.053506512	0.159672173	0.0873487	0.070715538	0.086675863	0.05986889	0.016136902	0.05150476	0.666666667	0.5	0.75	0.333333333	0	0.5	0.333333333	0.5	0.666666667	0.25	0.5	0	0.666666667	0.333333333	0.130059978	0.360022197	0.072664149	0.899293947	0.71347975	0.975443053	0.953733995	0.287915074	0.15346118	0.519328487	0.715485865	0.389832283	0.930914523	0.241593873	1
0.292103588	0.113868946	0.257518725	0.016070903	0.003671813	0.059628626	0.032706797	0.135372706	0.666799697	0.098421656	0.159494368	0.118105157	0.004375358	0.023818911	1	0.75	0.5	0	0.333333333	0.25	0.333333333	0.25	1	0.5	0.25	0.333333333	0.333333333	0	0.085057314	0.410053653	0.073960163	0.911124147	0.523164736	0.929482309	0.942586254	0.298994167	0.037062429	0.231271361	0.645276027	0.354869973	0.893805147	0.323351263	1
0.321165351	0.341332613	0.203859845	0.029602874	0.003201037	0.101328128	0.029827932	0.160529704	0.051816646	0.10370888	0.025082723	0.096985632	0.002276833	0.15037067	1	0.75	0.25	0.666666667	0	0.75	0.333333333	0.75	0	0.5	0.75	0.333333333	0.666666667	0.333333333	0.031371922	0.277556784	0.11238014	0.91024127	0.641250431	0.933173721	0.947606482	0.276357164	0.22944156	0.444883714	0.711289806	0.473875761	0.942629879	0.249782602	1
0.097601762	0.187010386	0.146137688	0.040374223	0.112413633	0.070372416	0.066130087	0.06584324	0.009046288	0.113894774	0.045025017	0.002293284	0.201080745	0.195931308	0.666666667	0.5	0.75	0.333333333	0.333333333	0.25	0.666666667	0.25	0.333333333	0.5	0.75	0.333333333	0.333333333	0.666666667	0.125233836	0.167293976	0.196425974	0.751835127	0.176140022	0.453262976	0.904407737	0.187197555	0.157306228	0.195984968	0.552672293	0.296123567	0.51065198	0.152170218	0
0.077803852	0.173235819	0.06352372	0.158463688	0.229903797	0.025879494	0.01655412	0	0.006041115	0.111459335	0.10430673	0.007108124	0.022789356	0.77493109	0.666666667	0.5	0.5	1	0.333333333	0.25	0.666666667	0.25	0.333333333	0.5	0.5	0.333333333	0.333333333	0.666666667	0.206713729	0.167682146	0.837062149	0.241421527	0.044189272	0.877738115	0.962254221	0.291326381	0.133841638	0.552724198	0.13383861	0.199400654	0.938668651	0.265328227	0
0.251425184	0.162194576	0.1276238	0.023538669	0.364796575	0.198255406	0.036117839	0.272691453	0.138096508	0.346339924	0.503358737	0.13075543	0.371028699	0.115540716	0.666666667	0.5	0.25	0.666666667	0.333333333	0.5	0.666666667	0.5	0.333333333	0.5	0.5	0.333333333	0.333333333	0.666666667	0.247036206	0.184507175	0.33031143	0.408649006	0.091160805	0.43740018	0.873730925	0.127275327	0.098505435	0.196173806	0.07142401	0.307742244	0.455241703	0.103614625	0
0.369462782	0.260933049	0.076351703	0.527158718	0.226434706	0.102095258	0.053570205	0.130868382	0.092608899	0.226600831	0.075281983	0.146511888	0.079573734	0.05203397	0.666666667	0.5	0.5	1	0	0.25	0.666666667	0.25	0.666666667	0.25	0.5	0.666666667	0.666666667	0.666666667	0.118947778	0.324791979	0.836268851	0.320716136	0.156748996	0.850283792	0.857399395	0.149097006	0.178367249	0.174108848	0.789688325	0.419809253	0.771974521	0.220001965	1
0.201660707	0.100905687	0.123564464	0.016948963	0.007200967	0.114667651	0.05635919	0.388551767	0.169916743	0.073808149	0.127373817	0.187256147	0.062458291	0.139476597	0.666666667	0.5	0.25	0.333333333	0	0.25	0	0.75	0.666666667	0	0.25	0.666666667	1	0.666666667	0.038430453	0.486320243	0.100556427	0.874692162	0.175860028	0.860473764	0.876430628	0.047416752	0.130718218	0.3506436	0.313857533	0.229431595	0.658668609	0.078738698	1
0.179966284	0.208399864	0.294603858	0.041503189	0.331246583	0.299782055	0.067842267	0.627011376	0.194512634	0.365327152	0.293838219	0.17386656	0.231532201	0.270859338	0.333333333	0.25	0.75	0.666666667	0	0.75	0.333333333	0.75	0.666666667	0.75	0.25	0.333333333	0	1	0.226296149	0.247576184	0.116587799	0.352439037	0.120209545	0.312256313	0.949859824	0.132904185	0.08758476	0.104804892	0.187250811	0.155375935	0.509002265	0.16553559	0
0.171338235	0.087150302	0.358168622	0.031817509	0.483550872	0.151633606	0.298376529	0.322926201	0.106932941	0.26689041	0.265447048	0.280199154	0.30260617	0.124691608	0.333333333	0.25	0.75	0	0	0.25	1	0.25	0.333333333	0.5	0.5	0.333333333	0.333333333	0.666666667	0.274932085	0.290115626	0.591432717	0.457225408	0.062261411	0.405970241	0.554884927	0.180711102	0.092387291	0.095839183	0.104896992	0.119235197	0.27184003	0.096537654	0
0.218953869	0.31257994	0.199302971	0.032845308	0.368222839	0.176206391	0.290545113	0.322607131	0.133416202	0.258126756	0.288168078	0.143487792	0.289353324	0.117872898	0.666666667	0.5	0.5	0.333333333	0	0.5	1	0.5	0	0.25	0.5	0.333333333	0	0.666666667	0.061595728	0.240284068	0.216578813	0.449345643	0.177536617	0.494545344	0.446897908	0.356076073	0.106954857	0.228422184	0.247481102	0.116014741	0.381026688	0.145078985	0
0.169946799	0.089411782	0.185306588	0.040360247	0.304863508	0.087549037	0.081190534	0.180947405	0.159679367	0.085594455	0.072811141	0.148866908	0.249457467	0.253892799	0.333333333	0.25	0.25	0.666666667	0.333333333	0.25	0.333333333	0.25	0.666666667	0.5	0.25	0.333333333	0.666666667	0.333333333	0.171497786	0.598488775	0.031057078	0.528470539	0.211263106	0.849692196	0.950905771	0.272796127	0.068175253	0.212391954	0.542894411	0.360510201	0.547610244	0.151616322	1
0.472912063	0.204402875	0.161668517	0.014054134	0.445032236	0.122155615	0.138013407	0.215184719	0.328931236	0.336299854	0.252358156	0.229929157	0.146147531	0.078144946	0.666666667	0.5	0.75	0	0.333333333	0.25	0.333333333	0.25	0.666666667	0.5	0.75	0.666666667	0.333333333	0.333333333	0.148893783	0.400464934	0.699673204	0.604308651	0.165061828	0.738627548	0.856499871	0.101281163	0.114349216	0.067872203	0.237166823	0.195873098	0.565703533	0.141948918	1
0.213368149	0.151249699	0.341838493	0.026501609	0.513037376	0.05722702	0.18881553	0.151291413	0.109492831	0.353326718	0.289362538	0.148886563	0.33462856	0.203044518	0.333333333	0.25	0.5	0.333333333	0.333333333	0.25	0.666666667	0.25	0.333333333	0.5	0.5	0.333333333	0.333333333	0.666666667	0.199603572	0.261495314	0.144761223	0.440012538	0.122933862	0.653250183	0.563576912	0.105427214	0.170004615	0.048377531	0.027753773	0.346886492	0.308386089	0.158241314	1
0.143110747	0.143991121	0.109236408	0.013813285	0.514848206	0.400729565	0.113500845	0.758657836	0.212917641	0.218900256	0.049672868	0.377891055	0.431829259	0.009448313	0.333333333	0.25	0.5	0.666666667	0	0.75	0.666666667	0.75	0.333333333	0.5	0.5	0.333333333	0.333333333	0.333333333	0.38511244	0.051396652	0.979993992	0.361840647	0.041930953	0.102971619	0.912737578	0.113389073	0.172850183	0.285947772	0.727459596	0.251281626	0.069057975	0.116838516	1
0.2233356	0.085298401	0.222821374	0.012967336	0.209519698	0.082504871	0.140090349	0.237376123	0.151487467	0.257686367	0.196176172	0.232504922	0.164323602	0.154779422	0.333333333	0.25	0.5	0	0	0.25	1	0.25	0.333333333	0.5	0.5	0.333333333	0.333333333	0.666666667	0.177275545	0.551551976	0.088594392	0.716510859	0.217508171	0.826079909	0.94799574	0.245001132	0.113011351	0.268813724	0.717909473	0.22024649	0.604429574	0.129614978	1
