# Supplementary material for: Machine Learning Model for Multiomics Biomarkers Identification for Menopause Status in Breast Cancer
Source: MDPI journal article supplement (doi:10.3390/a17010013), 2023-12-28
Supplement: s1 [file s1 › Supplemantry_materials.pdf]

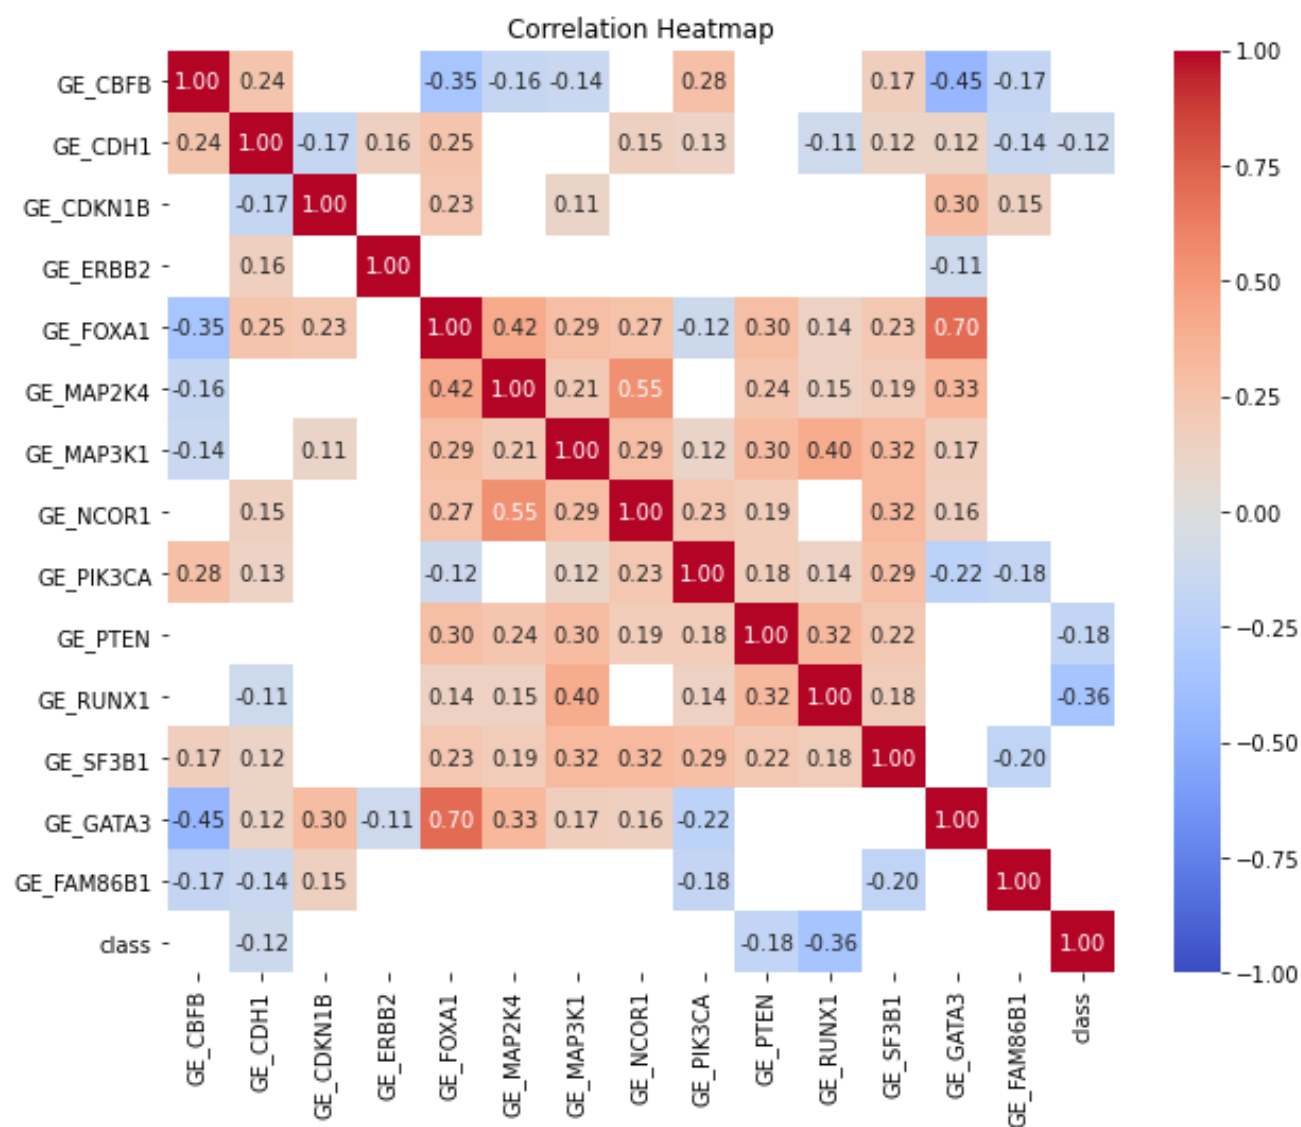

**Figure S1:** Pearson - Correlation matrix for the gene expression omic dataset that shows only the correlation value for the significant  $p$ -value  $< 0.05$ .

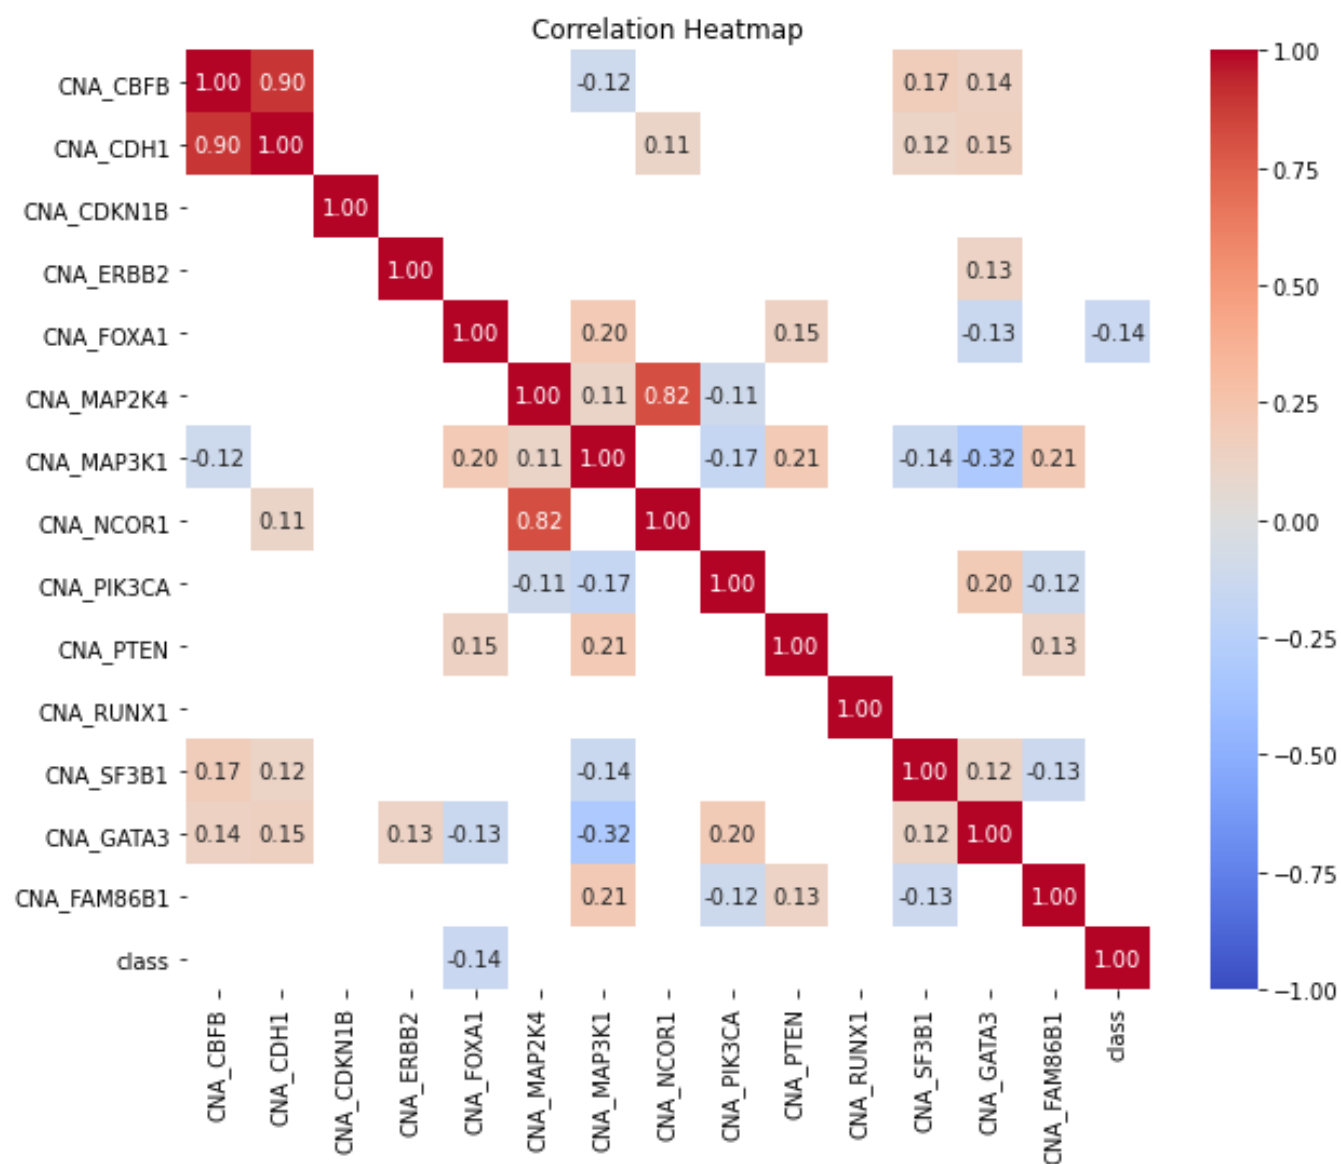

**Figure S2:** Pearson - Correlation matrix for the CNA omic dataset that shows only the correlation value for the significant  $p$ -value  $< 0.05$ .

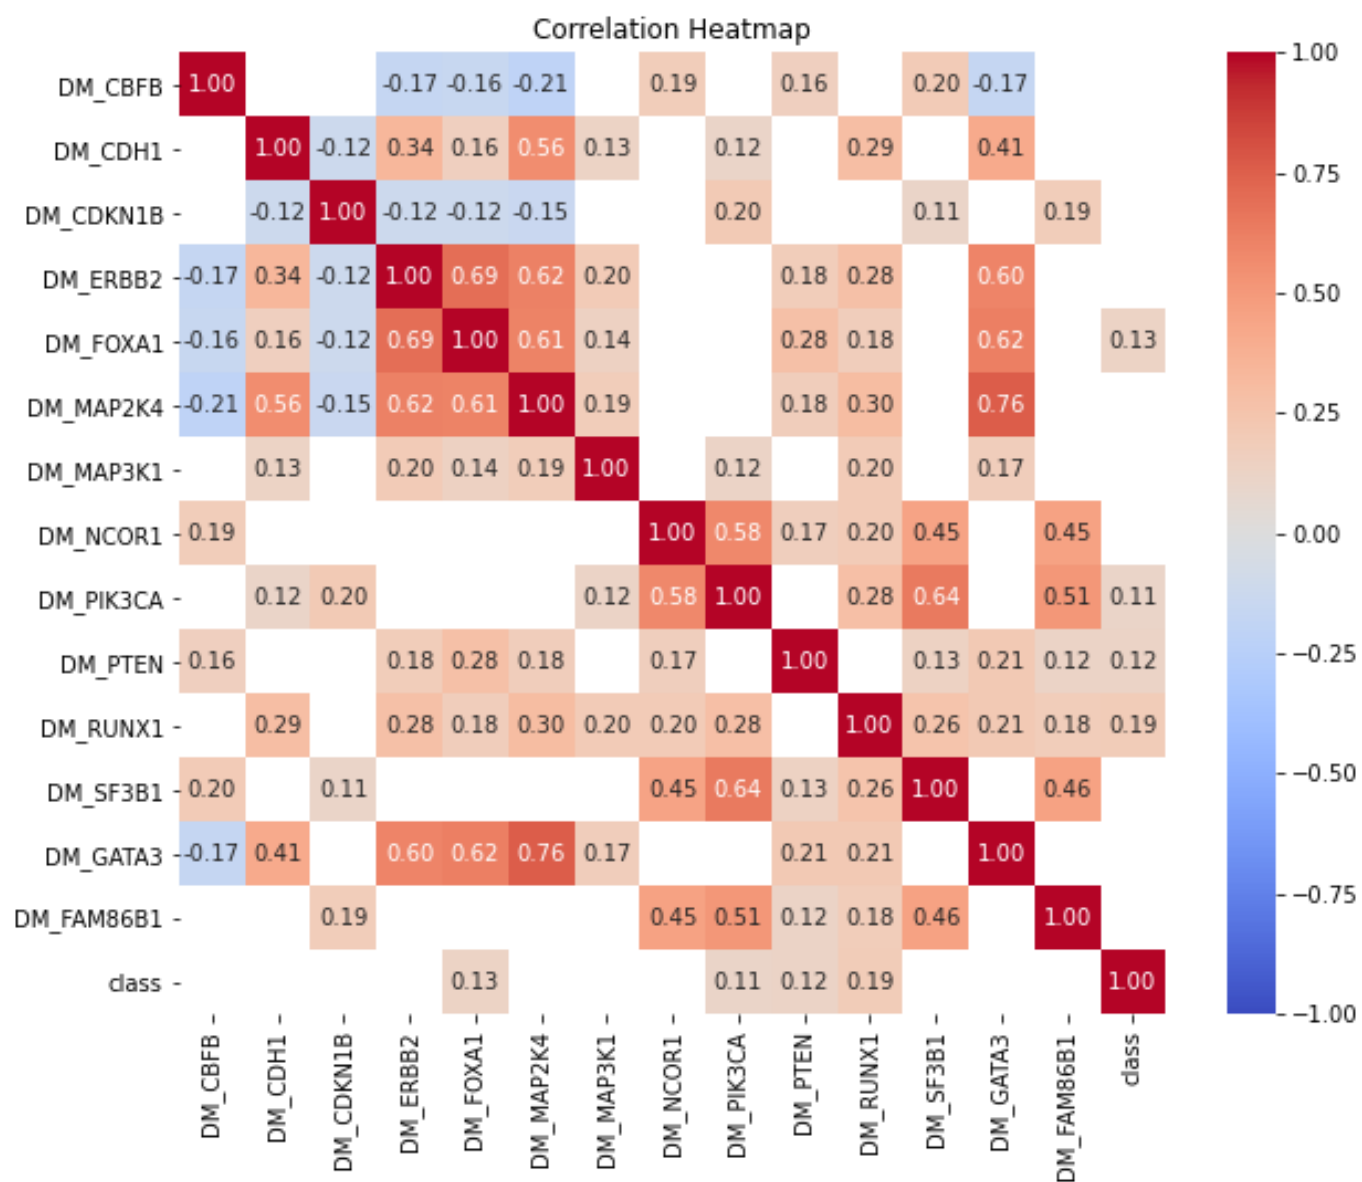

**Figure S3:** Pearson - Correlation matrix for the DNA Methylation omic dataset that shows only the correlation value for the significant  $p$ -value  $< 0.05$ .
